# Supplementary material for: Effect of underwater visual survey methodology on bias and precision of fish counts: a simulation approach
Source: PeerJ. 2018 Jul 30;6:e5378. doi: 10.7717/peerj.5378 (PMC6071614; doi:10.7717/peerj.5378)
Supplement: Data S5 — Raw data for all the model runs, including bias calculated for every replicate. [file peerj-06-5378-s006.xlsx]

## Sheet: stationary
behavior	method	turning.angle	radius (m)	time (min)	real.density	estimated.density	difference	bias	abs.bias
schooling	Stationary point count	2	1	3	0.3	0.955	0.655	2.18333	2.18333
schooling	Stationary point count	2	1	3	0.3	2.228	1.928	6.42667	6.42667
schooling	Stationary point count	2	1	3	0.3	1.592	1.292	4.30667	4.30667
schooling	Stationary point count	2	1	3	0.3	0.318	0.018	0.06	0.06
schooling	Stationary point count	2	1	3	0.3	2.546	2.246	7.48667	7.48667
schooling	Stationary point count	2	1	3	0.3	1.592	1.292	4.30667	4.30667
schooling	Stationary point count	2	1	3	0.3	2.228	1.928	6.42667	6.42667
schooling	Stationary point count	2	1	3	0.3	1.91	1.61	5.36667	5.36667
schooling	Stationary point count	2	1	3	0.3	2.228	1.928	6.42667	6.42667
schooling	Stationary point count	2	1	3	0.3	0.955	0.655	2.18333	2.18333
schooling	Stationary point count	2	1	5	0.3	3.82	3.52	11.7333	11.7333
schooling	Stationary point count	2	1	5	0.3	0.955	0.655	2.18333	2.18333
schooling	Stationary point count	2	1	5	0.3	2.228	1.928	6.42667	6.42667
schooling	Stationary point count	2	1	5	0.3	3.82	3.52	11.7333	11.7333
schooling	Stationary point count	2	1	5	0.3	2.546	2.246	7.48667	7.48667
schooling	Stationary point count	2	1	5	0.3	0.955	0.655	2.18333	2.18333
schooling	Stationary point count	2	1	5	0.3	1.91	1.61	5.36667	5.36667
schooling	Stationary point count	2	1	5	0.3	3.82	3.52	11.7333	11.7333
schooling	Stationary point count	2	1	5	0.3	2.865	2.565	8.55	8.55
schooling	Stationary point count	2	1	5	0.3	0.637	0.337	1.12333	1.12333
schooling	Stationary point count	2	1	7	0.3	1.91	1.61	5.36667	5.36667
schooling	Stationary point count	2	1	7	0.3	6.366	6.066	20.22	20.22
schooling	Stationary point count	2	1	7	0.3	4.456	4.156	13.8533	13.8533
schooling	Stationary point count	2	1	7	0.3	5.411	5.111	17.0367	17.0367
schooling	Stationary point count	2	1	7	0.3	2.546	2.246	7.48667	7.48667
schooling	Stationary point count	2	1	7	0.3	3.501	3.201	10.67	10.67
schooling	Stationary point count	2	1	7	0.3	5.411	5.111	17.0367	17.0367
schooling	Stationary point count	2	1	7	0.3	1.91	1.61	5.36667	5.36667
schooling	Stationary point count	2	1	7	0.3	3.501	3.201	10.67	10.67
schooling	Stationary point count	2	1	7	0.3	2.865	2.565	8.55	8.55
schooling	Stationary point count	2	1	9	0.3	3.501	3.201	10.67	10.67
schooling	Stationary point count	2	1	9	0.3	4.456	4.156	13.8533	13.8533
schooling	Stationary point count	2	1	9	0.3	6.685	6.385	21.2833	21.2833
schooling	Stationary point count	2	1	9	0.3	4.775	4.475	14.9167	14.9167
schooling	Stationary point count	2	1	9	0.3	2.228	1.928	6.42667	6.42667
schooling	Stationary point count	2	1	9	0.3	2.546	2.246	7.48667	7.48667
schooling	Stationary point count	2	1	9	0.3	1.273	0.973	3.24333	3.24333
schooling	Stationary point count	2	1	9	0.3	2.228	1.928	6.42667	6.42667
schooling	Stationary point count	2	1	9	0.3	3.82	3.52	11.7333	11.7333
schooling	Stationary point count	2	1	9	0.3	3.501	3.201	10.67	10.67
schooling	Stationary point count	2	1	11	0.3	2.546	2.246	7.48667	7.48667
schooling	Stationary point count	2	1	11	0.3	5.411	5.111	17.0367	17.0367
schooling	Stationary point count	2	1	11	0.3	7.003	6.703	22.3433	22.3433
schooling	Stationary point count	2	1	11	0.3	6.685	6.385	21.2833	21.2833
schooling	Stationary point count	2	1	11	0.3	9.231	8.931	29.77	29.77
schooling	Stationary point count	2	1	11	0.3	4.456	4.156	13.8533	13.8533
schooling	Stationary point count	2	1	11	0.3	1.592	1.292	4.30667	4.30667
schooling	Stationary point count	2	1	11	0.3	6.048	5.748	19.16	19.16
schooling	Stationary point count	2	1	11	0.3	4.456	4.156	13.8533	13.8533
schooling	Stationary point count	2	1	11	0.3	6.685	6.385	21.2833	21.2833
schooling	Stationary point count	2	2	3	0.3	1.114	0.814	2.71333	2.71333
schooling	Stationary point count	2	2	3	0.3	0.796	0.496	1.65333	1.65333
schooling	Stationary point count	2	2	3	0.3	0.796	0.496	1.65333	1.65333
schooling	Stationary point count	2	2	3	0.3	1.512	1.212	4.04	4.04
schooling	Stationary point count	2	2	3	0.3	1.671	1.371	4.57	4.57
schooling	Stationary point count	2	2	3	0.3	1.353	1.053	3.51	3.51
schooling	Stationary point count	2	2	3	0.3	1.671	1.371	4.57	4.57
schooling	Stationary point count	2	2	3	0.3	0.875	0.575	1.91667	1.91667
schooling	Stationary point count	2	2	3	0.3	2.308	2.008	6.69333	6.69333
schooling	Stationary point count	2	2	3	0.3	1.751	1.451	4.83667	4.83667
schooling	Stationary point count	2	2	5	0.3	5.093	4.793	15.9767	15.9767
schooling	Stationary point count	2	2	5	0.3	2.546	2.246	7.48667	7.48667
schooling	Stationary point count	2	2	5	0.3	1.751	1.451	4.83667	4.83667
schooling	Stationary point count	2	2	5	0.3	3.104	2.804	9.34667	9.34667
schooling	Stationary point count	2	2	5	0.3	3.82	3.52	11.7333	11.7333
schooling	Stationary point count	2	2	5	0.3	2.785	2.485	8.28333	8.28333
schooling	Stationary point count	2	2	5	0.3	3.74	3.44	11.4667	11.4667
schooling	Stationary point count	2	2	5	0.3	1.751	1.451	4.83667	4.83667
schooling	Stationary point count	2	2	5	0.3	3.104	2.804	9.34667	9.34667
schooling	Stationary point count	2	2	5	0.3	1.671	1.371	4.57	4.57
schooling	Stationary point count	2	2	7	0.3	5.73	5.43	18.1	18.1
schooling	Stationary point count	2	2	7	0.3	5.968	5.668	18.8933	18.8933
schooling	Stationary point count	2	2	7	0.3	3.263	2.963	9.87667	9.87667
schooling	Stationary point count	2	2	7	0.3	5.173	4.873	16.2433	16.2433
schooling	Stationary point count	2	2	7	0.3	6.844	6.544	21.8133	21.8133
schooling	Stationary point count	2	2	7	0.3	2.149	1.849	6.16333	6.16333
schooling	Stationary point count	2	2	7	0.3	4.058	3.758	12.5267	12.5267
schooling	Stationary point count	2	2	7	0.3	2.228	1.928	6.42667	6.42667
schooling	Stationary point count	2	2	7	0.3	2.865	2.565	8.55	8.55
schooling	Stationary point count	2	2	7	0.3	3.342	3.042	10.14	10.14
schooling	Stationary point count	2	2	9	0.3	5.252	4.952	16.5067	16.5067
schooling	Stationary point count	2	2	9	0.3	4.138	3.838	12.7933	12.7933
schooling	Stationary point count	2	2	9	0.3	5.73	5.43	18.1	18.1
schooling	Stationary point count	2	2	9	0.3	8.435	8.135	27.1167	27.1167
schooling	Stationary point count	2	2	9	0.3	5.809	5.509	18.3633	18.3633
schooling	Stationary point count	2	2	9	0.3	6.923	6.623	22.0767	22.0767
schooling	Stationary point count	2	2	9	0.3	5.252	4.952	16.5067	16.5067
schooling	Stationary point count	2	2	9	0.3	5.173	4.873	16.2433	16.2433
schooling	Stationary point count	2	2	9	0.3	7.401	7.101	23.67	23.67
schooling	Stationary point count	2	2	9	0.3	7.242	6.942	23.14	23.14
schooling	Stationary point count	2	2	11	0.3	4.854	4.554	15.18	15.18
schooling	Stationary point count	2	2	11	0.3	4.377	4.077	13.59	13.59
schooling	Stationary point count	2	2	11	0.3	5.093	4.793	15.9767	15.9767
schooling	Stationary point count	2	2	11	0.3	7.719	7.419	24.73	24.73
schooling	Stationary point count	2	2	11	0.3	7.48	7.18	23.9333	23.9333
schooling	Stationary point count	2	2	11	0.3	7.958	7.658	25.5267	25.5267
schooling	Stationary point count	2	2	11	0.3	5.173	4.873	16.2433	16.2433
schooling	Stationary point count	2	2	11	0.3	6.446	6.146	20.4867	20.4867
schooling	Stationary point count	2	2	11	0.3	6.764	6.464	21.5467	21.5467
schooling	Stationary point count	2	2	11	0.3	7.799	7.499	24.9967	24.9967
schooling	Stationary point count	2	3	3	0.3	1.167	0.867	2.89	2.89
schooling	Stationary point count	2	3	3	0.3	0.389	0.089	0.296667	0.296667
schooling	Stationary point count	2	3	3	0.3	1.379	1.079	3.59667	3.59667
schooling	Stationary point count	2	3	3	0.3	0.813	0.513	1.71	1.71
schooling	Stationary point count	2	3	3	0.3	1.167	0.867	2.89	2.89
schooling	Stationary point count	2	3	3	0.3	1.026	0.726	2.42	2.42
schooling	Stationary point count	2	3	3	0.3	1.45	1.15	3.83333	3.83333
schooling	Stationary point count	2	3	3	0.3	0.99	0.69	2.3	2.3
schooling	Stationary point count	2	3	3	0.3	1.309	1.009	3.36333	3.36333
schooling	Stationary point count	2	3	3	0.3	1.096	0.796	2.65333	2.65333
schooling	Stationary point count	2	3	5	0.3	3.112	2.812	9.37333	9.37333
schooling	Stationary point count	2	3	5	0.3	1.874	1.574	5.24667	5.24667
schooling	Stationary point count	2	3	5	0.3	1.167	0.867	2.89	2.89
schooling	Stationary point count	2	3	5	0.3	2.193	1.893	6.31	6.31
schooling	Stationary point count	2	3	5	0.3	1.698	1.398	4.66	4.66
schooling	Stationary point count	2	3	5	0.3	2.688	2.388	7.96	7.96
schooling	Stationary point count	2	3	5	0.3	2.193	1.893	6.31	6.31
schooling	Stationary point count	2	3	5	0.3	2.193	1.893	6.31	6.31
schooling	Stationary point count	2	3	5	0.3	1.839	1.539	5.13	5.13
schooling	Stationary point count	2	3	5	0.3	2.087	1.787	5.95667	5.95667
schooling	Stationary point count	2	3	7	0.3	3.006	2.706	9.02	9.02
schooling	Stationary point count	2	3	7	0.3	4.386	4.086	13.62	13.62
schooling	Stationary point count	2	3	7	0.3	3.501	3.201	10.67	10.67
schooling	Stationary point count	2	3	7	0.3	2.511	2.211	7.37	7.37
schooling	Stationary point count	2	3	7	0.3	2.016	1.716	5.72	5.72
schooling	Stationary point count	2	3	7	0.3	4.633	4.333	14.4433	14.4433
schooling	Stationary point count	2	3	7	0.3	1.981	1.681	5.60333	5.60333
schooling	Stationary point count	2	3	7	0.3	2.122	1.822	6.07333	6.07333
schooling	Stationary point count	2	3	7	0.3	3.714	3.414	11.38	11.38
schooling	Stationary point count	2	3	7	0.3	3.749	3.449	11.4967	11.4967
schooling	Stationary point count	2	3	9	0.3	2.617	2.317	7.72333	7.72333
schooling	Stationary point count	2	3	9	0.3	4.669	4.369	14.5633	14.5633
schooling	Stationary point count	2	3	9	0.3	4.492	4.192	13.9733	13.9733
schooling	Stationary point count	2	3	9	0.3	3.537	3.237	10.79	10.79
schooling	Stationary point count	2	3	9	0.3	4.315	4.015	13.3833	13.3833
schooling	Stationary point count	2	3	9	0.3	5.128	4.828	16.0933	16.0933
schooling	Stationary point count	2	3	9	0.3	4.669	4.369	14.5633	14.5633
schooling	Stationary point count	2	3	9	0.3	4.315	4.015	13.3833	13.3833
schooling	Stationary point count	2	3	9	0.3	4.279	3.979	13.2633	13.2633
schooling	Stationary point count	2	3	9	0.3	4.562	4.262	14.2067	14.2067
schooling	Stationary point count	2	3	11	0.3	4.209	3.909	13.03	13.03
schooling	Stationary point count	2	3	11	0.3	4.845	4.545	15.15	15.15
schooling	Stationary point count	2	3	11	0.3	4.35	4.05	13.5	13.5
schooling	Stationary point count	2	3	11	0.3	4.315	4.015	13.3833	13.3833
schooling	Stationary point count	2	3	11	0.3	6.861	6.561	21.87	21.87
schooling	Stationary point count	2	3	11	0.3	5.376	5.076	16.92	16.92
schooling	Stationary point count	2	3	11	0.3	4.881	4.581	15.27	15.27
schooling	Stationary point count	2	3	11	0.3	4.103	3.803	12.6767	12.6767
schooling	Stationary point count	2	3	11	0.3	6.897	6.597	21.99	21.99
schooling	Stationary point count	2	3	11	0.3	5.482	5.182	17.2733	17.2733
schooling	Stationary point count	2	4	3	0.3	0.836	0.536	1.78667	1.78667
schooling	Stationary point count	2	4	3	0.3	1.313	1.013	3.37667	3.37667
schooling	Stationary point count	2	4	3	0.3	1.094	0.794	2.64667	2.64667
schooling	Stationary point count	2	4	3	0.3	0.716	0.416	1.38667	1.38667
schooling	Stationary point count	2	4	3	0.3	1.035	0.735	2.45	2.45
schooling	Stationary point count	2	4	3	0.3	1.035	0.735	2.45	2.45
schooling	Stationary point count	2	4	3	0.3	1.015	0.715	2.38333	2.38333
schooling	Stationary point count	2	4	3	0.3	0.935	0.635	2.11667	2.11667
schooling	Stationary point count	2	4	3	0.3	1.154	0.854	2.84667	2.84667
schooling	Stationary point count	2	4	3	0.3	0.696	0.396	1.32	1.32
schooling	Stationary point count	2	4	5	0.3	1.572	1.272	4.24	4.24
schooling	Stationary point count	2	4	5	0.3	2.288	1.988	6.62667	6.62667
schooling	Stationary point count	2	4	5	0.3	1.651	1.351	4.50333	4.50333
schooling	Stationary point count	2	4	5	0.3	0.975	0.675	2.25	2.25
schooling	Stationary point count	2	4	5	0.3	1.293	0.993	3.31	3.31
schooling	Stationary point count	2	4	5	0.3	2.049	1.749	5.83	5.83
schooling	Stationary point count	2	4	5	0.3	2.049	1.749	5.83	5.83
schooling	Stationary point count	2	4	5	0.3	1.711	1.411	4.70333	4.70333
schooling	Stationary point count	2	4	5	0.3	2.049	1.749	5.83	5.83
schooling	Stationary point count	2	4	5	0.3	1.87	1.57	5.23333	5.23333
schooling	Stationary point count	2	4	7	0.3	2.248	1.948	6.49333	6.49333
schooling	Stationary point count	2	4	7	0.3	2.905	2.605	8.68333	8.68333
schooling	Stationary point count	2	4	7	0.3	2.706	2.406	8.02	8.02
schooling	Stationary point count	2	4	7	0.3	2.288	1.988	6.62667	6.62667
schooling	Stationary point count	2	4	7	0.3	1.89	1.59	5.3	5.3
schooling	Stationary point count	2	4	7	0.3	3.422	3.122	10.4067	10.4067
schooling	Stationary point count	2	4	7	0.3	2.984	2.684	8.94667	8.94667
schooling	Stationary point count	2	4	7	0.3	1.79	1.49	4.96667	4.96667
schooling	Stationary point count	2	4	7	0.3	3.382	3.082	10.2733	10.2733
schooling	Stationary point count	2	4	7	0.3	3.004	2.704	9.01333	9.01333
schooling	Stationary point count	2	4	9	0.3	5.65	5.35	17.8333	17.8333
schooling	Stationary point count	2	4	9	0.3	2.964	2.664	8.88	8.88
schooling	Stationary point count	2	4	9	0.3	4.078	3.778	12.5933	12.5933
schooling	Stationary point count	2	4	9	0.3	3.382	3.082	10.2733	10.2733
schooling	Stationary point count	2	4	9	0.3	2.825	2.525	8.41667	8.41667
schooling	Stationary point count	2	4	9	0.3	2.865	2.565	8.55	8.55
schooling	Stationary point count	2	4	9	0.3	4.337	4.037	13.4567	13.4567
schooling	Stationary point count	2	4	9	0.3	3.72	3.42	11.4	11.4
schooling	Stationary point count	2	4	9	0.3	3.223	2.923	9.74333	9.74333
schooling	Stationary point count	2	4	9	0.3	3.74	3.44	11.4667	11.4667
schooling	Stationary point count	2	4	11	0.3	4.178	3.878	12.9267	12.9267
schooling	Stationary point count	2	4	11	0.3	3.7	3.4	11.3333	11.3333
schooling	Stationary point count	2	4	11	0.3	4.337	4.037	13.4567	13.4567
schooling	Stationary point count	2	4	11	0.3	5.173	4.873	16.2433	16.2433
schooling	Stationary point count	2	4	11	0.3	3.104	2.804	9.34667	9.34667
schooling	Stationary point count	2	4	11	0.3	5.57	5.27	17.5667	17.5667
schooling	Stationary point count	2	4	11	0.3	3.482	3.182	10.6067	10.6067
schooling	Stationary point count	2	4	11	0.3	5.849	5.549	18.4967	18.4967
schooling	Stationary point count	2	4	11	0.3	4.098	3.798	12.66	12.66
schooling	Stationary point count	2	4	11	0.3	3.919	3.619	12.0633	12.0633
schooling	Stationary point count	2	5	3	0.3	0.764	0.464	1.54667	1.54667
schooling	Stationary point count	2	5	3	0.3	0.56	0.26	0.866667	0.866667
schooling	Stationary point count	2	5	3	0.3	0.649	0.349	1.16333	1.16333
schooling	Stationary point count	2	5	3	0.3	0.866	0.566	1.88667	1.88667
schooling	Stationary point count	2	5	3	0.3	0.777	0.477	1.59	1.59
schooling	Stationary point count	2	5	3	0.3	0.738	0.438	1.46	1.46
schooling	Stationary point count	2	5	3	0.3	0.853	0.553	1.84333	1.84333
schooling	Stationary point count	2	5	3	0.3	0.522	0.222	0.74	0.74
schooling	Stationary point count	2	5	3	0.3	0.547	0.247	0.823333	0.823333
schooling	Stationary point count	2	5	3	0.3	0.649	0.349	1.16333	1.16333
schooling	Stationary point count	2	5	5	0.3	1.413	1.113	3.71	3.71
schooling	Stationary point count	2	5	5	0.3	1.299	0.999	3.33	3.33
schooling	Stationary point count	2	5	5	0.3	1.222	0.922	3.07333	3.07333
schooling	Stationary point count	2	5	5	0.3	1.057	0.757	2.52333	2.52333
schooling	Stationary point count	2	5	5	0.3	1.146	0.846	2.82	2.82
schooling	Stationary point count	2	5	5	0.3	1.044	0.744	2.48	2.48
schooling	Stationary point count	2	5	5	0.3	1.184	0.884	2.94667	2.94667
schooling	Stationary point count	2	5	5	0.3	0.968	0.668	2.22667	2.22667
schooling	Stationary point count	2	5	5	0.3	1.235	0.935	3.11667	3.11667
schooling	Stationary point count	2	5	5	0.3	1.375	1.075	3.58333	3.58333
schooling	Stationary point count	2	5	7	0.3	1.617	1.317	4.39	4.39
schooling	Stationary point count	2	5	7	0.3	1.49	1.19	3.96667	3.96667
schooling	Stationary point count	2	5	7	0.3	2.075	1.775	5.91667	5.91667
schooling	Stationary point count	2	5	7	0.3	1.464	1.164	3.88	3.88
schooling	Stationary point count	2	5	7	0.3	2.355	2.055	6.85	6.85
schooling	Stationary point count	2	5	7	0.3	2.445	2.145	7.15	7.15
schooling	Stationary point count	2	5	7	0.3	2.114	1.814	6.04667	6.04667
schooling	Stationary point count	2	5	7	0.3	1.401	1.101	3.67	3.67
schooling	Stationary point count	2	5	7	0.3	1.502	1.202	4.00667	4.00667
schooling	Stationary point count	2	5	7	0.3	1.655	1.355	4.51667	4.51667
schooling	Stationary point count	2	5	9	0.3	2.203	1.903	6.34333	6.34333
schooling	Stationary point count	2	5	9	0.3	2.101	1.801	6.00333	6.00333
schooling	Stationary point count	2	5	9	0.3	1.604	1.304	4.34667	4.34667
schooling	Stationary point count	2	5	9	0.3	2.165	1.865	6.21667	6.21667
schooling	Stationary point count	2	5	9	0.3	0.904	0.604	2.01333	2.01333
schooling	Stationary point count	2	5	9	0.3	2.394	2.094	6.98	6.98
schooling	Stationary point count	2	5	9	0.3	1.884	1.584	5.28	5.28
schooling	Stationary point count	2	5	9	0.3	1.884	1.584	5.28	5.28
schooling	Stationary point count	2	5	9	0.3	1.846	1.546	5.15333	5.15333
schooling	Stationary point count	2	5	9	0.3	2.419	2.119	7.06333	7.06333
schooling	Stationary point count	2	5	11	0.3	2.687	2.387	7.95667	7.95667
schooling	Stationary point count	2	5	11	0.3	2.699	2.399	7.99667	7.99667
schooling	Stationary point count	2	5	11	0.3	2.61	2.31	7.7	7.7
schooling	Stationary point count	2	5	11	0.3	2.725	2.425	8.08333	8.08333
schooling	Stationary point count	2	5	11	0.3	2.254	1.954	6.51333	6.51333
schooling	Stationary point count	2	5	11	0.3	2.152	1.852	6.17333	6.17333
schooling	Stationary point count	2	5	11	0.3	2.763	2.463	8.21	8.21
schooling	Stationary point count	2	5	11	0.3	3.209	2.909	9.69667	9.69667
schooling	Stationary point count	2	5	11	0.3	3.272	2.972	9.90667	9.90667
schooling	Stationary point count	2	5	11	0.3	3.005	2.705	9.01667	9.01667
schooling	Stationary point count	4	1	3	0.3	1.273	0.973	3.24333	3.24333
schooling	Stationary point count	4	1	3	0.3	1.273	0.973	3.24333	3.24333
schooling	Stationary point count	4	1	3	0.3	0.955	0.655	2.18333	2.18333
schooling	Stationary point count	4	1	3	0.3	2.546	2.246	7.48667	7.48667
schooling	Stationary point count	4	1	3	0.3	0.637	0.337	1.12333	1.12333
schooling	Stationary point count	4	1	3	0.3	1.592	1.292	4.30667	4.30667
schooling	Stationary point count	4	1	3	0.3	2.228	1.928	6.42667	6.42667
schooling	Stationary point count	4	1	3	0.3	2.228	1.928	6.42667	6.42667
schooling	Stationary point count	4	1	3	0.3	2.865	2.565	8.55	8.55
schooling	Stationary point count	4	1	3	0.3	0.955	0.655	2.18333	2.18333
schooling	Stationary point count	4	1	5	0.3	2.228	1.928	6.42667	6.42667
schooling	Stationary point count	4	1	5	0.3	2.546	2.246	7.48667	7.48667
schooling	Stationary point count	4	1	5	0.3	1.273	0.973	3.24333	3.24333
schooling	Stationary point count	4	1	5	0.3	1.273	0.973	3.24333	3.24333
schooling	Stationary point count	4	1	5	0.3	3.183	2.883	9.61	9.61
schooling	Stationary point count	4	1	5	0.3	3.183	2.883	9.61	9.61
schooling	Stationary point count	4	1	5	0.3	1.592	1.292	4.30667	4.30667
schooling	Stationary point count	4	1	5	0.3	0.955	0.655	2.18333	2.18333
schooling	Stationary point count	4	1	5	0.3	3.183	2.883	9.61	9.61
schooling	Stationary point count	4	1	5	0.3	1.273	0.973	3.24333	3.24333
schooling	Stationary point count	4	1	7	0.3	1.91	1.61	5.36667	5.36667
schooling	Stationary point count	4	1	7	0.3	4.456	4.156	13.8533	13.8533
schooling	Stationary point count	4	1	7	0.3	4.456	4.156	13.8533	13.8533
schooling	Stationary point count	4	1	7	0.3	5.73	5.43	18.1	18.1
schooling	Stationary point count	4	1	7	0.3	1.91	1.61	5.36667	5.36667
schooling	Stationary point count	4	1	7	0.3	2.865	2.565	8.55	8.55
schooling	Stationary point count	4	1	7	0.3	4.456	4.156	13.8533	13.8533
schooling	Stationary point count	4	1	7	0.3	2.865	2.565	8.55	8.55
schooling	Stationary point count	4	1	7	0.3	1.592	1.292	4.30667	4.30667
schooling	Stationary point count	4	1	7	0.3	3.82	3.52	11.7333	11.7333
schooling	Stationary point count	4	1	9	0.3	3.501	3.201	10.67	10.67
schooling	Stationary point count	4	1	9	0.3	4.456	4.156	13.8533	13.8533
schooling	Stationary point count	4	1	9	0.3	4.456	4.156	13.8533	13.8533
schooling	Stationary point count	4	1	9	0.3	4.456	4.156	13.8533	13.8533
schooling	Stationary point count	4	1	9	0.3	5.093	4.793	15.9767	15.9767
schooling	Stationary point count	4	1	9	0.3	2.546	2.246	7.48667	7.48667
schooling	Stationary point count	4	1	9	0.3	7.639	7.339	24.4633	24.4633
schooling	Stationary point count	4	1	9	0.3	2.865	2.565	8.55	8.55
schooling	Stationary point count	4	1	9	0.3	4.138	3.838	12.7933	12.7933
schooling	Stationary point count	4	1	9	0.3	4.775	4.475	14.9167	14.9167
schooling	Stationary point count	4	1	11	0.3	4.138	3.838	12.7933	12.7933
schooling	Stationary point count	4	1	11	0.3	7.958	7.658	25.5267	25.5267
schooling	Stationary point count	4	1	11	0.3	4.456	4.156	13.8533	13.8533
schooling	Stationary point count	4	1	11	0.3	6.048	5.748	19.16	19.16
schooling	Stationary point count	4	1	11	0.3	5.73	5.43	18.1	18.1
schooling	Stationary point count	4	1	11	0.3	5.093	4.793	15.9767	15.9767
schooling	Stationary point count	4	1	11	0.3	4.775	4.475	14.9167	14.9167
schooling	Stationary point count	4	1	11	0.3	4.775	4.475	14.9167	14.9167
schooling	Stationary point count	4	1	11	0.3	3.501	3.201	10.67	10.67
schooling	Stationary point count	4	1	11	0.3	2.228	1.928	6.42667	6.42667
schooling	Stationary point count	4	2	3	0.3	1.035	0.735	2.45	2.45
schooling	Stationary point count	4	2	3	0.3	3.661	3.361	11.2033	11.2033
schooling	Stationary point count	4	2	3	0.3	2.228	1.928	6.42667	6.42667
schooling	Stationary point count	4	2	3	0.3	1.035	0.735	2.45	2.45
schooling	Stationary point count	4	2	3	0.3	2.546	2.246	7.48667	7.48667
schooling	Stationary point count	4	2	3	0.3	1.512	1.212	4.04	4.04
schooling	Stationary point count	4	2	3	0.3	3.581	3.281	10.9367	10.9367
schooling	Stationary point count	4	2	3	0.3	3.82	3.52	11.7333	11.7333
schooling	Stationary point count	4	2	3	0.3	2.546	2.246	7.48667	7.48667
schooling	Stationary point count	4	2	3	0.3	0.955	0.655	2.18333	2.18333
schooling	Stationary point count	4	2	5	0.3	3.979	3.679	12.2633	12.2633
schooling	Stationary point count	4	2	5	0.3	3.581	3.281	10.9367	10.9367
schooling	Stationary point count	4	2	5	0.3	2.228	1.928	6.42667	6.42667
schooling	Stationary point count	4	2	5	0.3	2.308	2.008	6.69333	6.69333
schooling	Stationary point count	4	2	5	0.3	4.058	3.758	12.5267	12.5267
schooling	Stationary point count	4	2	5	0.3	6.048	5.748	19.16	19.16
schooling	Stationary point count	4	2	5	0.3	3.82	3.52	11.7333	11.7333
schooling	Stationary point count	4	2	5	0.3	2.944	2.644	8.81333	8.81333
schooling	Stationary point count	4	2	5	0.3	3.342	3.042	10.14	10.14
schooling	Stationary point count	4	2	5	0.3	3.581	3.281	10.9367	10.9367
schooling	Stationary point count	4	2	7	0.3	7.48	7.18	23.9333	23.9333
schooling	Stationary point count	4	2	7	0.3	4.695	4.395	14.65	14.65
schooling	Stationary point count	4	2	7	0.3	5.252	4.952	16.5067	16.5067
schooling	Stationary point count	4	2	7	0.3	5.411	5.111	17.0367	17.0367
schooling	Stationary point count	4	2	7	0.3	7.719	7.419	24.73	24.73
schooling	Stationary point count	4	2	7	0.3	3.82	3.52	11.7333	11.7333
schooling	Stationary point count	4	2	7	0.3	3.979	3.679	12.2633	12.2633
schooling	Stationary point count	4	2	7	0.3	4.615	4.315	14.3833	14.3833
schooling	Stationary point count	4	2	7	0.3	1.989	1.689	5.63	5.63
schooling	Stationary point count	4	2	7	0.3	2.387	2.087	6.95667	6.95667
schooling	Stationary point count	4	2	9	0.3	6.605	6.305	21.0167	21.0167
schooling	Stationary point count	4	2	9	0.3	5.013	4.713	15.71	15.71
schooling	Stationary point count	4	2	9	0.3	6.605	6.305	21.0167	21.0167
schooling	Stationary point count	4	2	9	0.3	8.833	8.533	28.4433	28.4433
schooling	Stationary point count	4	2	9	0.3	4.536	4.236	14.12	14.12
schooling	Stationary point count	4	2	9	0.3	8.117	7.817	26.0567	26.0567
schooling	Stationary point count	4	2	9	0.3	7.799	7.499	24.9967	24.9967
schooling	Stationary point count	4	2	9	0.3	4.615	4.315	14.3833	14.3833
schooling	Stationary point count	4	2	9	0.3	6.525	6.225	20.75	20.75
schooling	Stationary point count	4	2	9	0.3	6.923	6.623	22.0767	22.0767
schooling	Stationary point count	4	2	11	0.3	5.013	4.713	15.71	15.71
schooling	Stationary point count	4	2	11	0.3	4.695	4.395	14.65	14.65
schooling	Stationary point count	4	2	11	0.3	6.844	6.544	21.8133	21.8133
schooling	Stationary point count	4	2	11	0.3	4.138	3.838	12.7933	12.7933
schooling	Stationary point count	4	2	11	0.3	2.149	1.849	6.16333	6.16333
schooling	Stationary point count	4	2	11	0.3	6.366	6.066	20.22	20.22
schooling	Stationary point count	4	2	11	0.3	6.048	5.748	19.16	19.16
schooling	Stationary point count	4	2	11	0.3	8.913	8.613	28.71	28.71
schooling	Stationary point count	4	2	11	0.3	7.242	6.942	23.14	23.14
schooling	Stationary point count	4	2	11	0.3	8.276	7.976	26.5867	26.5867
schooling	Stationary point count	4	3	3	0.3	1.026	0.726	2.42	2.42
schooling	Stationary point count	4	3	3	0.3	1.627	1.327	4.42333	4.42333
schooling	Stationary point count	4	3	3	0.3	1.804	1.504	5.01333	5.01333
schooling	Stationary point count	4	3	3	0.3	1.096	0.796	2.65333	2.65333
schooling	Stationary point count	4	3	3	0.3	1.485	1.185	3.95	3.95
schooling	Stationary point count	4	3	3	0.3	2.476	2.176	7.25333	7.25333
schooling	Stationary point count	4	3	3	0.3	2.44	2.14	7.13333	7.13333
schooling	Stationary point count	4	3	3	0.3	1.415	1.115	3.71667	3.71667
schooling	Stationary point count	4	3	3	0.3	1.379	1.079	3.59667	3.59667
schooling	Stationary point count	4	3	3	0.3	2.193	1.893	6.31	6.31
schooling	Stationary point count	4	3	5	0.3	2.653	2.353	7.84333	7.84333
schooling	Stationary point count	4	3	5	0.3	2.617	2.317	7.72333	7.72333
schooling	Stationary point count	4	3	5	0.3	2.9	2.6	8.66667	8.66667
schooling	Stationary point count	4	3	5	0.3	2.193	1.893	6.31	6.31
schooling	Stationary point count	4	3	5	0.3	2.264	1.964	6.54667	6.54667
schooling	Stationary point count	4	3	5	0.3	2.299	1.999	6.66333	6.66333
schooling	Stationary point count	4	3	5	0.3	2.37	2.07	6.9	6.9
schooling	Stationary point count	4	3	5	0.3	2.865	2.565	8.55	8.55
schooling	Stationary point count	4	3	5	0.3	2.759	2.459	8.19667	8.19667
schooling	Stationary point count	4	3	5	0.3	1.874	1.574	5.24667	5.24667
schooling	Stationary point count	4	3	7	0.3	4.032	3.732	12.44	12.44
schooling	Stationary point count	4	3	7	0.3	3.325	3.025	10.0833	10.0833
schooling	Stationary point count	4	3	7	0.3	3.006	2.706	9.02	9.02
schooling	Stationary point count	4	3	7	0.3	2.476	2.176	7.25333	7.25333
schooling	Stationary point count	4	3	7	0.3	2.299	1.999	6.66333	6.66333
schooling	Stationary point count	4	3	7	0.3	2.794	2.494	8.31333	8.31333
schooling	Stationary point count	4	3	7	0.3	4.456	4.156	13.8533	13.8533
schooling	Stationary point count	4	3	7	0.3	3.572	3.272	10.9067	10.9067
schooling	Stationary point count	4	3	7	0.3	4.315	4.015	13.3833	13.3833
schooling	Stationary point count	4	3	7	0.3	5.27	4.97	16.5667	16.5667
schooling	Stationary point count	4	3	9	0.3	4.209	3.909	13.03	13.03
schooling	Stationary point count	4	3	9	0.3	4.845	4.545	15.15	15.15
schooling	Stationary point count	4	3	9	0.3	4.386	4.086	13.62	13.62
schooling	Stationary point count	4	3	9	0.3	2.829	2.529	8.43	8.43
schooling	Stationary point count	4	3	9	0.3	3.608	3.308	11.0267	11.0267
schooling	Stationary point count	4	3	9	0.3	4.775	4.475	14.9167	14.9167
schooling	Stationary point count	4	3	9	0.3	5.093	4.793	15.9767	15.9767
schooling	Stationary point count	4	3	9	0.3	2.829	2.529	8.43	8.43
schooling	Stationary point count	4	3	9	0.3	3.643	3.343	11.1433	11.1433
schooling	Stationary point count	4	3	9	0.3	5.058	4.758	15.86	15.86
schooling	Stationary point count	4	3	11	0.3	6.72	6.42	21.4	21.4
schooling	Stationary point count	4	3	11	0.3	5.164	4.864	16.2133	16.2133
schooling	Stationary point count	4	3	11	0.3	5.482	5.182	17.2733	17.2733
schooling	Stationary point count	4	3	11	0.3	7.604	7.304	24.3467	24.3467
schooling	Stationary point count	4	3	11	0.3	5.694	5.394	17.98	17.98
schooling	Stationary point count	4	3	11	0.3	4.421	4.121	13.7367	13.7367
schooling	Stationary point count	4	3	11	0.3	7.18	6.88	22.9333	22.9333
schooling	Stationary point count	4	3	11	0.3	5.623	5.323	17.7433	17.7433
schooling	Stationary point count	4	3	11	0.3	3.36	3.06	10.2	10.2
schooling	Stationary point count	4	3	11	0.3	6.578	6.278	20.9267	20.9267
schooling	Stationary point count	4	4	3	0.3	1.293	0.993	3.31	3.31
schooling	Stationary point count	4	4	3	0.3	0.836	0.536	1.78667	1.78667
schooling	Stationary point count	4	4	3	0.3	1.631	1.331	4.43667	4.43667
schooling	Stationary point count	4	4	3	0.3	1.373	1.073	3.57667	3.57667
schooling	Stationary point count	4	4	3	0.3	1.452	1.152	3.84	3.84
schooling	Stationary point count	4	4	3	0.3	1.97	1.67	5.56667	5.56667
schooling	Stationary point count	4	4	3	0.3	1.214	0.914	3.04667	3.04667
schooling	Stationary point count	4	4	3	0.3	1.114	0.814	2.71333	2.71333
schooling	Stationary point count	4	4	3	0.3	1.174	0.874	2.91333	2.91333
schooling	Stationary point count	4	4	3	0.3	1.552	1.252	4.17333	4.17333
schooling	Stationary point count	4	4	5	0.3	2.268	1.968	6.56	6.56
schooling	Stationary point count	4	4	5	0.3	1.95	1.65	5.5	5.5
schooling	Stationary point count	4	4	5	0.3	3.084	2.784	9.28	9.28
schooling	Stationary point count	4	4	5	0.3	2.566	2.266	7.55333	7.55333
schooling	Stationary point count	4	4	5	0.3	2.527	2.227	7.42333	7.42333
schooling	Stationary point count	4	4	5	0.3	1.87	1.57	5.23333	5.23333
schooling	Stationary point count	4	4	5	0.3	1.81	1.51	5.03333	5.03333
schooling	Stationary point count	4	4	5	0.3	2.845	2.545	8.48333	8.48333
schooling	Stationary point count	4	4	5	0.3	1.611	1.311	4.37	4.37
schooling	Stationary point count	4	4	5	0.3	2.367	2.067	6.89	6.89
schooling	Stationary point count	4	4	7	0.3	3.362	3.062	10.2067	10.2067
schooling	Stationary point count	4	4	7	0.3	2.626	2.326	7.75333	7.75333
schooling	Stationary point count	4	4	7	0.3	3.302	3.002	10.0067	10.0067
schooling	Stationary point count	4	4	7	0.3	2.666	2.366	7.88667	7.88667
schooling	Stationary point count	4	4	7	0.3	2.745	2.445	8.15	8.15
schooling	Stationary point count	4	4	7	0.3	3.641	3.341	11.1367	11.1367
schooling	Stationary point count	4	4	7	0.3	3.561	3.261	10.87	10.87
schooling	Stationary point count	4	4	7	0.3	2.606	2.306	7.68667	7.68667
schooling	Stationary point count	4	4	7	0.3	3.979	3.679	12.2633	12.2633
schooling	Stationary point count	4	4	7	0.3	2.905	2.605	8.68333	8.68333
schooling	Stationary point count	4	4	9	0.3	4.735	4.435	14.7833	14.7833
schooling	Stationary point count	4	4	9	0.3	3.939	3.639	12.13	12.13
schooling	Stationary point count	4	4	9	0.3	3.462	3.162	10.54	10.54
schooling	Stationary point count	4	4	9	0.3	3.024	2.724	9.08	9.08
schooling	Stationary point count	4	4	9	0.3	4.556	4.256	14.1867	14.1867
schooling	Stationary point count	4	4	9	0.3	3.462	3.162	10.54	10.54
schooling	Stationary point count	4	4	9	0.3	4.397	4.097	13.6567	13.6567
schooling	Stationary point count	4	4	9	0.3	3.959	3.659	12.1967	12.1967
schooling	Stationary point count	4	4	9	0.3	3.919	3.619	12.0633	12.0633
schooling	Stationary point count	4	4	9	0.3	3.86	3.56	11.8667	11.8667
schooling	Stationary point count	4	4	11	0.3	4.218	3.918	13.06	13.06
schooling	Stationary point count	4	4	11	0.3	6.147	5.847	19.49	19.49
schooling	Stationary point count	4	4	11	0.3	5.849	5.549	18.4967	18.4967
schooling	Stationary point count	4	4	11	0.3	5.033	4.733	15.7767	15.7767
schooling	Stationary point count	4	4	11	0.3	3.899	3.599	11.9967	11.9967
schooling	Stationary point count	4	4	11	0.3	4.218	3.918	13.06	13.06
schooling	Stationary point count	4	4	11	0.3	6.127	5.827	19.4233	19.4233
schooling	Stationary point count	4	4	11	0.3	5.63	5.33	17.7667	17.7667
schooling	Stationary point count	4	4	11	0.3	4.078	3.778	12.5933	12.5933
schooling	Stationary point count	4	4	11	0.3	3.601	3.301	11.0033	11.0033
schooling	Stationary point count	4	5	3	0.3	0.751	0.451	1.50333	1.50333
schooling	Stationary point count	4	5	3	0.3	0.866	0.566	1.88667	1.88667
schooling	Stationary point count	4	5	3	0.3	0.777	0.477	1.59	1.59
schooling	Stationary point count	4	5	3	0.3	1.082	0.782	2.60667	2.60667
schooling	Stationary point count	4	5	3	0.3	0.586	0.286	0.953333	0.953333
schooling	Stationary point count	4	5	3	0.3	0.866	0.566	1.88667	1.88667
schooling	Stationary point count	4	5	3	0.3	0.433	0.133	0.443333	0.443333
schooling	Stationary point count	4	5	3	0.3	1.273	0.973	3.24333	3.24333
schooling	Stationary point count	4	5	3	0.3	1.261	0.961	3.20333	3.20333
schooling	Stationary point count	4	5	3	0.3	0.637	0.337	1.12333	1.12333
schooling	Stationary point count	4	5	5	0.3	1.12	0.82	2.73333	2.73333
schooling	Stationary point count	4	5	5	0.3	1.108	0.808	2.69333	2.69333
schooling	Stationary point count	4	5	5	0.3	1.681	1.381	4.60333	4.60333
schooling	Stationary point count	4	5	5	0.3	1.604	1.304	4.34667	4.34667
schooling	Stationary point count	4	5	5	0.3	1.171	0.871	2.90333	2.90333
schooling	Stationary point count	4	5	5	0.3	1.719	1.419	4.73	4.73
schooling	Stationary point count	4	5	5	0.3	1.668	1.368	4.56	4.56
schooling	Stationary point count	4	5	5	0.3	1.872	1.572	5.24	5.24
schooling	Stationary point count	4	5	5	0.3	1.923	1.623	5.41	5.41
schooling	Stationary point count	4	5	5	0.3	1.057	0.757	2.52333	2.52333
schooling	Stationary point count	4	5	7	0.3	1.324	1.024	3.41333	3.41333
schooling	Stationary point count	4	5	7	0.3	1.859	1.559	5.19667	5.19667
schooling	Stationary point count	4	5	7	0.3	2.266	1.966	6.55333	6.55333
schooling	Stationary point count	4	5	7	0.3	1.706	1.406	4.68667	4.68667
schooling	Stationary point count	4	5	7	0.3	1.604	1.304	4.34667	4.34667
schooling	Stationary point count	4	5	7	0.3	2.394	2.094	6.98	6.98
schooling	Stationary point count	4	5	7	0.3	2.279	1.979	6.59667	6.59667
schooling	Stationary point count	4	5	7	0.3	2.126	1.826	6.08667	6.08667
schooling	Stationary point count	4	5	7	0.3	2.266	1.966	6.55333	6.55333
schooling	Stationary point count	4	5	7	0.3	2.101	1.801	6.00333	6.00333
schooling	Stationary point count	4	5	9	0.3	2.419	2.119	7.06333	7.06333
schooling	Stationary point count	4	5	9	0.3	2.126	1.826	6.08667	6.08667
schooling	Stationary point count	4	5	9	0.3	2.432	2.132	7.10667	7.10667
schooling	Stationary point count	4	5	9	0.3	2.47	2.17	7.23333	7.23333
schooling	Stationary point count	4	5	9	0.3	3.056	2.756	9.18667	9.18667
schooling	Stationary point count	4	5	9	0.3	2.368	2.068	6.89333	6.89333
schooling	Stationary point count	4	5	9	0.3	1.757	1.457	4.85667	4.85667
schooling	Stationary point count	4	5	9	0.3	1.999	1.699	5.66333	5.66333
schooling	Stationary point count	4	5	9	0.3	1.808	1.508	5.02667	5.02667
schooling	Stationary point count	4	5	9	0.3	3.349	3.049	10.1633	10.1633
schooling	Stationary point count	4	5	11	0.3	3.221	2.921	9.73667	9.73667
schooling	Stationary point count	4	5	11	0.3	3.119	2.819	9.39667	9.39667
schooling	Stationary point count	4	5	11	0.3	3.501	3.201	10.67	10.67
schooling	Stationary point count	4	5	11	0.3	2.114	1.814	6.04667	6.04667
schooling	Stationary point count	4	5	11	0.3	2.597	2.297	7.65667	7.65667
schooling	Stationary point count	4	5	11	0.3	3.514	3.214	10.7133	10.7133
schooling	Stationary point count	4	5	11	0.3	1.795	1.495	4.98333	4.98333
schooling	Stationary point count	4	5	11	0.3	3.552	3.252	10.84	10.84
schooling	Stationary point count	4	5	11	0.3	3.272	2.972	9.90667	9.90667
schooling	Stationary point count	4	5	11	0.3	3.069	2.769	9.23	9.23
schooling	Stationary point count	6	1	3	0.3	1.91	1.61	5.36667	5.36667
schooling	Stationary point count	6	1	3	0.3	1.592	1.292	4.30667	4.30667
schooling	Stationary point count	6	1	3	0.3	0.955	0.655	2.18333	2.18333
schooling	Stationary point count	6	1	3	0.3	0.637	0.337	1.12333	1.12333
schooling	Stationary point count	6	1	3	0.3	2.546	2.246	7.48667	7.48667
schooling	Stationary point count	6	1	3	0.3	2.546	2.246	7.48667	7.48667
schooling	Stationary point count	6	1	3	0.3	0.637	0.337	1.12333	1.12333
schooling	Stationary point count	6	1	3	0.3	4.775	4.475	14.9167	14.9167
schooling	Stationary point count	6	1	3	0.3	0.955	0.655	2.18333	2.18333
schooling	Stationary point count	6	1	3	0.3	1.273	0.973	3.24333	3.24333
schooling	Stationary point count	6	1	5	0.3	5.73	5.43	18.1	18.1
schooling	Stationary point count	6	1	5	0.3	1.592	1.292	4.30667	4.30667
schooling	Stationary point count	6	1	5	0.3	2.228	1.928	6.42667	6.42667
schooling	Stationary point count	6	1	5	0.3	2.546	2.246	7.48667	7.48667
schooling	Stationary point count	6	1	5	0.3	2.546	2.246	7.48667	7.48667
schooling	Stationary point count	6	1	5	0.3	2.546	2.246	7.48667	7.48667
schooling	Stationary point count	6	1	5	0.3	2.546	2.246	7.48667	7.48667
schooling	Stationary point count	6	1	5	0.3	2.228	1.928	6.42667	6.42667
schooling	Stationary point count	6	1	5	0.3	0.955	0.655	2.18333	2.18333
schooling	Stationary point count	6	1	5	0.3	2.228	1.928	6.42667	6.42667
schooling	Stationary point count	6	1	7	0.3	3.183	2.883	9.61	9.61
schooling	Stationary point count	6	1	7	0.3	5.73	5.43	18.1	18.1
schooling	Stationary point count	6	1	7	0.3	0.955	0.655	2.18333	2.18333
schooling	Stationary point count	6	1	7	0.3	6.685	6.385	21.2833	21.2833
schooling	Stationary point count	6	1	7	0.3	4.775	4.475	14.9167	14.9167
schooling	Stationary point count	6	1	7	0.3	2.546	2.246	7.48667	7.48667
schooling	Stationary point count	6	1	7	0.3	1.592	1.292	4.30667	4.30667
schooling	Stationary point count	6	1	7	0.3	4.456	4.156	13.8533	13.8533
schooling	Stationary point count	6	1	7	0.3	3.183	2.883	9.61	9.61
schooling	Stationary point count	6	1	7	0.3	3.82	3.52	11.7333	11.7333
schooling	Stationary point count	6	1	9	0.3	2.865	2.565	8.55	8.55
schooling	Stationary point count	6	1	9	0.3	3.82	3.52	11.7333	11.7333
schooling	Stationary point count	6	1	9	0.3	3.183	2.883	9.61	9.61
schooling	Stationary point count	6	1	9	0.3	1.91	1.61	5.36667	5.36667
schooling	Stationary point count	6	1	9	0.3	3.501	3.201	10.67	10.67
schooling	Stationary point count	6	1	9	0.3	4.456	4.156	13.8533	13.8533
schooling	Stationary point count	6	1	9	0.3	3.501	3.201	10.67	10.67
schooling	Stationary point count	6	1	9	0.3	1.273	0.973	3.24333	3.24333
schooling	Stationary point count	6	1	9	0.3	2.546	2.246	7.48667	7.48667
schooling	Stationary point count	6	1	9	0.3	3.183	2.883	9.61	9.61
schooling	Stationary point count	6	1	11	0.3	6.048	5.748	19.16	19.16
schooling	Stationary point count	6	1	11	0.3	2.865	2.565	8.55	8.55
schooling	Stationary point count	6	1	11	0.3	6.048	5.748	19.16	19.16
schooling	Stationary point count	6	1	11	0.3	6.366	6.066	20.22	20.22
schooling	Stationary point count	6	1	11	0.3	5.411	5.111	17.0367	17.0367
schooling	Stationary point count	6	1	11	0.3	2.228	1.928	6.42667	6.42667
schooling	Stationary point count	6	1	11	0.3	4.138	3.838	12.7933	12.7933
schooling	Stationary point count	6	1	11	0.3	4.456	4.156	13.8533	13.8533
schooling	Stationary point count	6	1	11	0.3	7.958	7.658	25.5267	25.5267
schooling	Stationary point count	6	1	11	0.3	7.003	6.703	22.3433	22.3433
schooling	Stationary point count	6	2	3	0.3	2.149	1.849	6.16333	6.16333
schooling	Stationary point count	6	2	3	0.3	2.467	2.167	7.22333	7.22333
schooling	Stationary point count	6	2	3	0.3	2.149	1.849	6.16333	6.16333
schooling	Stationary point count	6	2	3	0.3	2.706	2.406	8.02	8.02
schooling	Stationary point count	6	2	3	0.3	2.387	2.087	6.95667	6.95667
schooling	Stationary point count	6	2	3	0.3	3.581	3.281	10.9367	10.9367
schooling	Stationary point count	6	2	3	0.3	2.308	2.008	6.69333	6.69333
schooling	Stationary point count	6	2	3	0.3	0.796	0.496	1.65333	1.65333
schooling	Stationary point count	6	2	3	0.3	2.785	2.485	8.28333	8.28333
schooling	Stationary point count	6	2	3	0.3	2.944	2.644	8.81333	8.81333
schooling	Stationary point count	6	2	5	0.3	4.058	3.758	12.5267	12.5267
schooling	Stationary point count	6	2	5	0.3	3.899	3.599	11.9967	11.9967
schooling	Stationary point count	6	2	5	0.3	4.058	3.758	12.5267	12.5267
schooling	Stationary point count	6	2	5	0.3	4.297	3.997	13.3233	13.3233
schooling	Stationary point count	6	2	5	0.3	5.411	5.111	17.0367	17.0367
schooling	Stationary point count	6	2	5	0.3	2.785	2.485	8.28333	8.28333
schooling	Stationary point count	6	2	5	0.3	7.321	7.021	23.4033	23.4033
schooling	Stationary point count	6	2	5	0.3	2.387	2.087	6.95667	6.95667
schooling	Stationary point count	6	2	5	0.3	3.501	3.201	10.67	10.67
schooling	Stationary point count	6	2	5	0.3	3.183	2.883	9.61	9.61
schooling	Stationary point count	6	2	7	0.3	4.297	3.997	13.3233	13.3233
schooling	Stationary point count	6	2	7	0.3	6.446	6.146	20.4867	20.4867
schooling	Stationary point count	6	2	7	0.3	10.425	10.125	33.75	33.75
schooling	Stationary point count	6	2	7	0.3	4.456	4.156	13.8533	13.8533
schooling	Stationary point count	6	2	7	0.3	5.332	5.032	16.7733	16.7733
schooling	Stationary point count	6	2	7	0.3	4.456	4.156	13.8533	13.8533
schooling	Stationary point count	6	2	7	0.3	4.775	4.475	14.9167	14.9167
schooling	Stationary point count	6	2	7	0.3	4.377	4.077	13.59	13.59
schooling	Stationary point count	6	2	7	0.3	5.889	5.589	18.63	18.63
schooling	Stationary point count	6	2	7	0.3	3.74	3.44	11.4667	11.4667
schooling	Stationary point count	6	2	9	0.3	2.387	2.087	6.95667	6.95667
schooling	Stationary point count	6	2	9	0.3	8.276	7.976	26.5867	26.5867
schooling	Stationary point count	6	2	9	0.3	3.979	3.679	12.2633	12.2633
schooling	Stationary point count	6	2	9	0.3	6.366	6.066	20.22	20.22
schooling	Stationary point count	6	2	9	0.3	6.685	6.385	21.2833	21.2833
schooling	Stationary point count	6	2	9	0.3	8.754	8.454	28.18	28.18
schooling	Stationary point count	6	2	9	0.3	9.151	8.851	29.5033	29.5033
schooling	Stationary point count	6	2	9	0.3	9.151	8.851	29.5033	29.5033
schooling	Stationary point count	6	2	9	0.3	6.605	6.305	21.0167	21.0167
schooling	Stationary point count	6	2	9	0.3	10.902	10.602	35.34	35.34
schooling	Stationary point count	6	2	11	0.3	8.196	7.896	26.32	26.32
schooling	Stationary point count	6	2	11	0.3	5.013	4.713	15.71	15.71
schooling	Stationary point count	6	2	11	0.3	6.844	6.544	21.8133	21.8133
schooling	Stationary point count	6	2	11	0.3	9.311	9.011	30.0367	30.0367
schooling	Stationary point count	6	2	11	0.3	11.698	11.398	37.9933	37.9933
schooling	Stationary point count	6	2	11	0.3	8.435	8.135	27.1167	27.1167
schooling	Stationary point count	6	2	11	0.3	3.024	2.724	9.08	9.08
schooling	Stationary point count	6	2	11	0.3	10.823	10.523	35.0767	35.0767
schooling	Stationary point count	6	2	11	0.3	5.968	5.668	18.8933	18.8933
schooling	Stationary point count	6	2	11	0.3	12.573	12.273	40.91	40.91
schooling	Stationary point count	6	3	3	0.3	1.768	1.468	4.89333	4.89333
schooling	Stationary point count	6	3	3	0.3	2.653	2.353	7.84333	7.84333
schooling	Stationary point count	6	3	3	0.3	1.45	1.15	3.83333	3.83333
schooling	Stationary point count	6	3	3	0.3	1.698	1.398	4.66	4.66
schooling	Stationary point count	6	3	3	0.3	1.945	1.645	5.48333	5.48333
schooling	Stationary point count	6	3	3	0.3	2.193	1.893	6.31	6.31
schooling	Stationary point count	6	3	3	0.3	2.405	2.105	7.01667	7.01667
schooling	Stationary point count	6	3	3	0.3	0.778	0.478	1.59333	1.59333
schooling	Stationary point count	6	3	3	0.3	2.546	2.246	7.48667	7.48667
schooling	Stationary point count	6	3	3	0.3	1.627	1.327	4.42333	4.42333
schooling	Stationary point count	6	3	5	0.3	4.386	4.086	13.62	13.62
schooling	Stationary point count	6	3	5	0.3	3.006	2.706	9.02	9.02
schooling	Stationary point count	6	3	5	0.3	2.334	2.034	6.78	6.78
schooling	Stationary point count	6	3	5	0.3	2.971	2.671	8.90333	8.90333
schooling	Stationary point count	6	3	5	0.3	2.653	2.353	7.84333	7.84333
schooling	Stationary point count	6	3	5	0.3	3.82	3.52	11.7333	11.7333
schooling	Stationary point count	6	3	5	0.3	3.501	3.201	10.67	10.67
schooling	Stationary point count	6	3	5	0.3	2.087	1.787	5.95667	5.95667
schooling	Stationary point count	6	3	5	0.3	0.884	0.584	1.94667	1.94667
schooling	Stationary point count	6	3	5	0.3	3.112	2.812	9.37333	9.37333
schooling	Stationary point count	6	3	7	0.3	4.492	4.192	13.9733	13.9733
schooling	Stationary point count	6	3	7	0.3	6.154	5.854	19.5133	19.5133
schooling	Stationary point count	6	3	7	0.3	3.148	2.848	9.49333	9.49333
schooling	Stationary point count	6	3	7	0.3	3.395	3.095	10.3167	10.3167
schooling	Stationary point count	6	3	7	0.3	4.279	3.979	13.2633	13.2633
schooling	Stationary point count	6	3	7	0.3	5.447	5.147	17.1567	17.1567
schooling	Stationary point count	6	3	7	0.3	3.749	3.449	11.4967	11.4967
schooling	Stationary point count	6	3	7	0.3	3.042	2.742	9.14	9.14
schooling	Stationary point count	6	3	7	0.3	4.386	4.086	13.62	13.62
schooling	Stationary point count	6	3	7	0.3	2.37	2.07	6.9	6.9
schooling	Stationary point count	6	3	9	0.3	4.881	4.581	15.27	15.27
schooling	Stationary point count	6	3	9	0.3	4.244	3.944	13.1467	13.1467
schooling	Stationary point count	6	3	9	0.3	7.816	7.516	25.0533	25.0533
schooling	Stationary point count	6	3	9	0.3	5.553	5.253	17.51	17.51
schooling	Stationary point count	6	3	9	0.3	7.392	7.092	23.64	23.64
schooling	Stationary point count	6	3	9	0.3	4.739	4.439	14.7967	14.7967
schooling	Stationary point count	6	3	9	0.3	4.81	4.51	15.0333	15.0333
schooling	Stationary point count	6	3	9	0.3	7.356	7.056	23.52	23.52
schooling	Stationary point count	6	3	9	0.3	5.128	4.828	16.0933	16.0933
schooling	Stationary point count	6	3	9	0.3	4.492	4.192	13.9733	13.9733
schooling	Stationary point count	6	3	11	0.3	4.492	4.192	13.9733	13.9733
schooling	Stationary point count	6	3	11	0.3	8.347	8.047	26.8233	26.8233
schooling	Stationary point count	6	3	11	0.3	6.472	6.172	20.5733	20.5733
schooling	Stationary point count	6	3	11	0.3	6.189	5.889	19.63	19.63
schooling	Stationary point count	6	3	11	0.3	4.739	4.439	14.7967	14.7967
schooling	Stationary point count	6	3	11	0.3	6.225	5.925	19.75	19.75
schooling	Stationary point count	6	3	11	0.3	8.382	8.082	26.94	26.94
schooling	Stationary point count	6	3	11	0.3	8.983	8.683	28.9433	28.9433
schooling	Stationary point count	6	3	11	0.3	10.398	10.098	33.66	33.66
schooling	Stationary point count	6	3	11	0.3	8.524	8.224	27.4133	27.4133
schooling	Stationary point count	6	4	3	0.3	1.631	1.331	4.43667	4.43667
schooling	Stationary point count	6	4	3	0.3	2.487	2.187	7.29	7.29
schooling	Stationary point count	6	4	3	0.3	1.313	1.013	3.37667	3.37667
schooling	Stationary point count	6	4	3	0.3	1.611	1.311	4.37	4.37
schooling	Stationary point count	6	4	3	0.3	1.035	0.735	2.45	2.45
schooling	Stationary point count	6	4	3	0.3	1.81	1.51	5.03333	5.03333
schooling	Stationary point count	6	4	3	0.3	1.552	1.252	4.17333	4.17333
schooling	Stationary point count	6	4	3	0.3	1.631	1.331	4.43667	4.43667
schooling	Stationary point count	6	4	3	0.3	1.512	1.212	4.04	4.04
schooling	Stationary point count	6	4	3	0.3	1.492	1.192	3.97333	3.97333
schooling	Stationary point count	6	4	5	0.3	3.78	3.48	11.6	11.6
schooling	Stationary point count	6	4	5	0.3	2.546	2.246	7.48667	7.48667
schooling	Stationary point count	6	4	5	0.3	3.203	2.903	9.67667	9.67667
schooling	Stationary point count	6	4	5	0.3	2.706	2.406	8.02	8.02
schooling	Stationary point count	6	4	5	0.3	2.566	2.266	7.55333	7.55333
schooling	Stationary point count	6	4	5	0.3	2.248	1.948	6.49333	6.49333
schooling	Stationary point count	6	4	5	0.3	3.541	3.241	10.8033	10.8033
schooling	Stationary point count	6	4	5	0.3	2.248	1.948	6.49333	6.49333
schooling	Stationary point count	6	4	5	0.3	2.944	2.644	8.81333	8.81333
schooling	Stationary point count	6	4	5	0.3	2.387	2.087	6.95667	6.95667
schooling	Stationary point count	6	4	7	0.3	3.462	3.162	10.54	10.54
schooling	Stationary point count	6	4	7	0.3	3.74	3.44	11.4667	11.4667
schooling	Stationary point count	6	4	7	0.3	3.86	3.56	11.8667	11.8667
schooling	Stationary point count	6	4	7	0.3	4.556	4.256	14.1867	14.1867
schooling	Stationary point count	6	4	7	0.3	4.297	3.997	13.3233	13.3233
schooling	Stationary point count	6	4	7	0.3	3.621	3.321	11.07	11.07
schooling	Stationary point count	6	4	7	0.3	4.417	4.117	13.7233	13.7233
schooling	Stationary point count	6	4	7	0.3	3.601	3.301	11.0033	11.0033
schooling	Stationary point count	6	4	7	0.3	2.984	2.684	8.94667	8.94667
schooling	Stationary point count	6	4	7	0.3	5.431	5.131	17.1033	17.1033
schooling	Stationary point count	6	4	9	0.3	7.142	6.842	22.8067	22.8067
schooling	Stationary point count	6	4	9	0.3	3.541	3.241	10.8033	10.8033
schooling	Stationary point count	6	4	9	0.3	3.621	3.321	11.07	11.07
schooling	Stationary point count	6	4	9	0.3	4.397	4.097	13.6567	13.6567
schooling	Stationary point count	6	4	9	0.3	5.889	5.589	18.63	18.63
schooling	Stationary point count	6	4	9	0.3	3.104	2.804	9.34667	9.34667
schooling	Stationary point count	6	4	9	0.3	5.192	4.892	16.3067	16.3067
schooling	Stationary point count	6	4	9	0.3	3.84	3.54	11.8	11.8
schooling	Stationary point count	6	4	9	0.3	5.173	4.873	16.2433	16.2433
schooling	Stationary point count	6	4	9	0.3	4.297	3.997	13.3233	13.3233
schooling	Stationary point count	6	4	11	0.3	4.914	4.614	15.38	15.38
schooling	Stationary point count	6	4	11	0.3	5.849	5.549	18.4967	18.4967
schooling	Stationary point count	6	4	11	0.3	6.307	6.007	20.0233	20.0233
schooling	Stationary point count	6	4	11	0.3	4.377	4.077	13.59	13.59
schooling	Stationary point count	6	4	11	0.3	4.516	4.216	14.0533	14.0533
schooling	Stationary point count	6	4	11	0.3	4.198	3.898	12.9933	12.9933
schooling	Stationary point count	6	4	11	0.3	5.511	5.211	17.37	17.37
schooling	Stationary point count	6	4	11	0.3	6.724	6.424	21.4133	21.4133
schooling	Stationary point count	6	4	11	0.3	5.292	4.992	16.64	16.64
schooling	Stationary point count	6	4	11	0.3	5.073	4.773	15.91	15.91
schooling	Stationary point count	6	5	3	0.3	0.738	0.438	1.46	1.46
schooling	Stationary point count	6	5	3	0.3	1.146	0.846	2.82	2.82
schooling	Stationary point count	6	5	3	0.3	1.057	0.757	2.52333	2.52333
schooling	Stationary point count	6	5	3	0.3	0.7	0.4	1.33333	1.33333
schooling	Stationary point count	6	5	3	0.3	0.649	0.349	1.16333	1.16333
schooling	Stationary point count	6	5	3	0.3	1.617	1.317	4.39	4.39
schooling	Stationary point count	6	5	3	0.3	1.541	1.241	4.13667	4.13667
schooling	Stationary point count	6	5	3	0.3	0.751	0.451	1.50333	1.50333
schooling	Stationary point count	6	5	3	0.3	1.082	0.782	2.60667	2.60667
schooling	Stationary point count	6	5	3	0.3	1.375	1.075	3.58333	3.58333
schooling	Stationary point count	6	5	5	0.3	2.177	1.877	6.25667	6.25667
schooling	Stationary point count	6	5	5	0.3	1.362	1.062	3.54	3.54
schooling	Stationary point count	6	5	5	0.3	1.706	1.406	4.68667	4.68667
schooling	Stationary point count	6	5	5	0.3	1.515	1.215	4.05	4.05
schooling	Stationary point count	6	5	5	0.3	1.159	0.859	2.86333	2.86333
schooling	Stationary point count	6	5	5	0.3	1.579	1.279	4.26333	4.26333
schooling	Stationary point count	6	5	5	0.3	1.21	0.91	3.03333	3.03333
schooling	Stationary point count	6	5	5	0.3	1.261	0.961	3.20333	3.20333
schooling	Stationary point count	6	5	5	0.3	1.299	0.999	3.33	3.33
schooling	Stationary point count	6	5	5	0.3	2.546	2.246	7.48667	7.48667
schooling	Stationary point count	6	5	7	0.3	2.177	1.877	6.25667	6.25667
schooling	Stationary point count	6	5	7	0.3	2.075	1.775	5.91667	5.91667
schooling	Stationary point count	6	5	7	0.3	1.744	1.444	4.81333	4.81333
schooling	Stationary point count	6	5	7	0.3	2.597	2.297	7.65667	7.65667
schooling	Stationary point count	6	5	7	0.3	3.145	2.845	9.48333	9.48333
schooling	Stationary point count	6	5	7	0.3	3.107	2.807	9.35667	9.35667
schooling	Stationary point count	6	5	7	0.3	2.114	1.814	6.04667	6.04667
schooling	Stationary point count	6	5	7	0.3	2.33	2.03	6.76667	6.76667
schooling	Stationary point count	6	5	7	0.3	1.579	1.279	4.26333	4.26333
schooling	Stationary point count	6	5	7	0.3	2.317	2.017	6.72333	6.72333
schooling	Stationary point count	6	5	9	0.3	2.139	1.839	6.13	6.13
schooling	Stationary point count	6	5	9	0.3	2.445	2.145	7.15	7.15
schooling	Stationary point count	6	5	9	0.3	3.54	3.24	10.8	10.8
schooling	Stationary point count	6	5	9	0.3	2.916	2.616	8.72	8.72
schooling	Stationary point count	6	5	9	0.3	3.476	3.176	10.5867	10.5867
schooling	Stationary point count	6	5	9	0.3	3.056	2.756	9.18667	9.18667
schooling	Stationary point count	6	5	9	0.3	3.17	2.87	9.56667	9.56667
schooling	Stationary point count	6	5	9	0.3	1.91	1.61	5.36667	5.36667
schooling	Stationary point count	6	5	9	0.3	2.33	2.03	6.76667	6.76667
schooling	Stationary point count	6	5	9	0.3	2.445	2.145	7.15	7.15
schooling	Stationary point count	6	5	11	0.3	2.47	2.17	7.23333	7.23333
schooling	Stationary point count	6	5	11	0.3	2.89	2.59	8.63333	8.63333
schooling	Stationary point count	6	5	11	0.3	4.329	4.029	13.43	13.43
schooling	Stationary point count	6	5	11	0.3	3.947	3.647	12.1567	12.1567
schooling	Stationary point count	6	5	11	0.3	4.036	3.736	12.4533	12.4533
schooling	Stationary point count	6	5	11	0.3	3.82	3.52	11.7333	11.7333
schooling	Stationary point count	6	5	11	0.3	2.954	2.654	8.84667	8.84667
schooling	Stationary point count	6	5	11	0.3	3.629	3.329	11.0967	11.0967
schooling	Stationary point count	6	5	11	0.3	3.234	2.934	9.78	9.78
schooling	Stationary point count	6	5	11	0.3	4.94	4.64	15.4667	15.4667
schooling	Stationary point count	8	1	3	0.3	1.273	0.973	3.24333	3.24333
schooling	Stationary point count	8	1	3	0.3	1.91	1.61	5.36667	5.36667
schooling	Stationary point count	8	1	3	0.3	0.955	0.655	2.18333	2.18333
schooling	Stationary point count	8	1	3	0.3	1.273	0.973	3.24333	3.24333
schooling	Stationary point count	8	1	3	0.3	2.865	2.565	8.55	8.55
schooling	Stationary point count	8	1	3	0.3	3.501	3.201	10.67	10.67
schooling	Stationary point count	8	1	3	0.3	2.546	2.246	7.48667	7.48667
schooling	Stationary point count	8	1	3	0.3	0.637	0.337	1.12333	1.12333
schooling	Stationary point count	8	1	3	0.3	1.592	1.292	4.30667	4.30667
schooling	Stationary point count	8	1	3	0.3	6.685	6.385	21.2833	21.2833
schooling	Stationary point count	8	1	5	0.3	1.592	1.292	4.30667	4.30667
schooling	Stationary point count	8	1	5	0.3	2.546	2.246	7.48667	7.48667
schooling	Stationary point count	8	1	5	0.3	2.228	1.928	6.42667	6.42667
schooling	Stationary point count	8	1	5	0.3	6.366	6.066	20.22	20.22
schooling	Stationary point count	8	1	5	0.3	4.775	4.475	14.9167	14.9167
schooling	Stationary point count	8	1	5	0.3	2.228	1.928	6.42667	6.42667
schooling	Stationary point count	8	1	5	0.3	2.865	2.565	8.55	8.55
schooling	Stationary point count	8	1	5	0.3	5.73	5.43	18.1	18.1
schooling	Stationary point count	8	1	5	0.3	1.91	1.61	5.36667	5.36667
schooling	Stationary point count	8	1	5	0.3	0.637	0.337	1.12333	1.12333
schooling	Stationary point count	8	1	7	0.3	1.91	1.61	5.36667	5.36667
schooling	Stationary point count	8	1	7	0.3	3.501	3.201	10.67	10.67
schooling	Stationary point count	8	1	7	0.3	3.501	3.201	10.67	10.67
schooling	Stationary point count	8	1	7	0.3	2.546	2.246	7.48667	7.48667
schooling	Stationary point count	8	1	7	0.3	3.501	3.201	10.67	10.67
schooling	Stationary point count	8	1	7	0.3	7.003	6.703	22.3433	22.3433
schooling	Stationary point count	8	1	7	0.3	4.456	4.156	13.8533	13.8533
schooling	Stationary point count	8	1	7	0.3	4.456	4.156	13.8533	13.8533
schooling	Stationary point count	8	1	7	0.3	4.138	3.838	12.7933	12.7933
schooling	Stationary point count	8	1	7	0.3	6.366	6.066	20.22	20.22
schooling	Stationary point count	8	1	9	0.3	7.003	6.703	22.3433	22.3433
schooling	Stationary point count	8	1	9	0.3	2.865	2.565	8.55	8.55
schooling	Stationary point count	8	1	9	0.3	8.594	8.294	27.6467	27.6467
schooling	Stationary point count	8	1	9	0.3	1.91	1.61	5.36667	5.36667
schooling	Stationary point count	8	1	9	0.3	5.73	5.43	18.1	18.1
schooling	Stationary point count	8	1	9	0.3	3.82	3.52	11.7333	11.7333
schooling	Stationary point count	8	1	9	0.3	5.093	4.793	15.9767	15.9767
schooling	Stationary point count	8	1	9	0.3	2.546	2.246	7.48667	7.48667
schooling	Stationary point count	8	1	9	0.3	6.366	6.066	20.22	20.22
schooling	Stationary point count	8	1	9	0.3	2.546	2.246	7.48667	7.48667
schooling	Stationary point count	8	1	11	0.3	8.913	8.613	28.71	28.71
schooling	Stationary point count	8	1	11	0.3	3.82	3.52	11.7333	11.7333
schooling	Stationary point count	8	1	11	0.3	8.913	8.613	28.71	28.71
schooling	Stationary point count	8	1	11	0.3	6.366	6.066	20.22	20.22
schooling	Stationary point count	8	1	11	0.3	8.594	8.294	27.6467	27.6467
schooling	Stationary point count	8	1	11	0.3	2.865	2.565	8.55	8.55
schooling	Stationary point count	8	1	11	0.3	4.138	3.838	12.7933	12.7933
schooling	Stationary point count	8	1	11	0.3	4.456	4.156	13.8533	13.8533
schooling	Stationary point count	8	1	11	0.3	6.366	6.066	20.22	20.22
schooling	Stationary point count	8	1	11	0.3	5.73	5.43	18.1	18.1
schooling	Stationary point count	8	2	3	0.3	3.422	3.122	10.4067	10.4067
schooling	Stationary point count	8	2	3	0.3	2.069	1.769	5.89667	5.89667
schooling	Stationary point count	8	2	3	0.3	4.218	3.918	13.06	13.06
schooling	Stationary point count	8	2	3	0.3	3.661	3.361	11.2033	11.2033
schooling	Stationary point count	8	2	3	0.3	2.228	1.928	6.42667	6.42667
schooling	Stationary point count	8	2	3	0.3	3.422	3.122	10.4067	10.4067
schooling	Stationary point count	8	2	3	0.3	2.069	1.769	5.89667	5.89667
schooling	Stationary point count	8	2	3	0.3	2.308	2.008	6.69333	6.69333
schooling	Stationary point count	8	2	3	0.3	2.467	2.167	7.22333	7.22333
schooling	Stationary point count	8	2	3	0.3	2.706	2.406	8.02	8.02
schooling	Stationary point count	8	2	5	0.3	3.501	3.201	10.67	10.67
schooling	Stationary point count	8	2	5	0.3	3.979	3.679	12.2633	12.2633
schooling	Stationary point count	8	2	5	0.3	4.456	4.156	13.8533	13.8533
schooling	Stationary point count	8	2	5	0.3	2.467	2.167	7.22333	7.22333
schooling	Stationary point count	8	2	5	0.3	4.218	3.918	13.06	13.06
schooling	Stationary point count	8	2	5	0.3	2.546	2.246	7.48667	7.48667
schooling	Stationary point count	8	2	5	0.3	4.058	3.758	12.5267	12.5267
schooling	Stationary point count	8	2	5	0.3	3.104	2.804	9.34667	9.34667
schooling	Stationary point count	8	2	5	0.3	3.024	2.724	9.08	9.08
schooling	Stationary point count	8	2	5	0.3	4.218	3.918	13.06	13.06
schooling	Stationary point count	8	2	7	0.3	4.934	4.634	15.4467	15.4467
schooling	Stationary point count	8	2	7	0.3	4.934	4.634	15.4467	15.4467
schooling	Stationary point count	8	2	7	0.3	5.013	4.713	15.71	15.71
schooling	Stationary point count	8	2	7	0.3	7.401	7.101	23.67	23.67
schooling	Stationary point count	8	2	7	0.3	5.411	5.111	17.0367	17.0367
schooling	Stationary point count	8	2	7	0.3	7.242	6.942	23.14	23.14
schooling	Stationary point count	8	2	7	0.3	5.173	4.873	16.2433	16.2433
schooling	Stationary point count	8	2	7	0.3	7.878	7.578	25.26	25.26
schooling	Stationary point count	8	2	7	0.3	4.695	4.395	14.65	14.65
schooling	Stationary point count	8	2	7	0.3	5.411	5.111	17.0367	17.0367
schooling	Stationary point count	8	2	9	0.3	9.788	9.488	31.6267	31.6267
schooling	Stationary point count	8	2	9	0.3	3.74	3.44	11.4667	11.4667
schooling	Stationary point count	8	2	9	0.3	2.069	1.769	5.89667	5.89667
schooling	Stationary point count	8	2	9	0.3	10.186	9.886	32.9533	32.9533
schooling	Stationary point count	8	2	9	0.3	8.276	7.976	26.5867	26.5867
schooling	Stationary point count	8	2	9	0.3	6.048	5.748	19.16	19.16
schooling	Stationary point count	8	2	9	0.3	7.56	7.26	24.2	24.2
schooling	Stationary point count	8	2	9	0.3	8.992	8.692	28.9733	28.9733
schooling	Stationary point count	8	2	9	0.3	6.207	5.907	19.69	19.69
schooling	Stationary point count	8	2	9	0.3	7.878	7.578	25.26	25.26
schooling	Stationary point count	8	2	11	0.3	11.857	11.557	38.5233	38.5233
schooling	Stationary point count	8	2	11	0.3	9.868	9.568	31.8933	31.8933
schooling	Stationary point count	8	2	11	0.3	5.73	5.43	18.1	18.1
schooling	Stationary point count	8	2	11	0.3	14.483	14.183	47.2767	47.2767
schooling	Stationary point count	8	2	11	0.3	5.252	4.952	16.5067	16.5067
schooling	Stationary point count	8	2	11	0.3	8.037	7.737	25.79	25.79
schooling	Stationary point count	8	2	11	0.3	8.992	8.692	28.9733	28.9733
schooling	Stationary point count	8	2	11	0.3	6.366	6.066	20.22	20.22
schooling	Stationary point count	8	2	11	0.3	8.913	8.613	28.71	28.71
schooling	Stationary point count	8	2	11	0.3	7.48	7.18	23.9333	23.9333
schooling	Stationary point count	8	3	3	0.3	2.299	1.999	6.66333	6.66333
schooling	Stationary point count	8	3	3	0.3	1.627	1.327	4.42333	4.42333
schooling	Stationary point count	8	3	3	0.3	2.299	1.999	6.66333	6.66333
schooling	Stationary point count	8	3	3	0.3	2.511	2.211	7.37	7.37
schooling	Stationary point count	8	3	3	0.3	2.37	2.07	6.9	6.9
schooling	Stationary point count	8	3	3	0.3	1.592	1.292	4.30667	4.30667
schooling	Stationary point count	8	3	3	0.3	3.183	2.883	9.61	9.61
schooling	Stationary point count	8	3	3	0.3	2.016	1.716	5.72	5.72
schooling	Stationary point count	8	3	3	0.3	2.37	2.07	6.9	6.9
schooling	Stationary point count	8	3	3	0.3	1.804	1.504	5.01333	5.01333
schooling	Stationary point count	8	3	5	0.3	4.492	4.192	13.9733	13.9733
schooling	Stationary point count	8	3	5	0.3	2.688	2.388	7.96	7.96
schooling	Stationary point count	8	3	5	0.3	2.264	1.964	6.54667	6.54667
schooling	Stationary point count	8	3	5	0.3	2.723	2.423	8.07667	8.07667
schooling	Stationary point count	8	3	5	0.3	2.794	2.494	8.31333	8.31333
schooling	Stationary point count	8	3	5	0.3	3.042	2.742	9.14	9.14
schooling	Stationary point count	8	3	5	0.3	3.36	3.06	10.2	10.2
schooling	Stationary point count	8	3	5	0.3	5.659	5.359	17.8633	17.8633
schooling	Stationary point count	8	3	5	0.3	2.759	2.459	8.19667	8.19667
schooling	Stationary point count	8	3	5	0.3	2.405	2.105	7.01667	7.01667
schooling	Stationary point count	8	3	7	0.3	5.482	5.182	17.2733	17.2733
schooling	Stationary point count	8	3	7	0.3	5.517	5.217	17.39	17.39
schooling	Stationary point count	8	3	7	0.3	3.36	3.06	10.2	10.2
schooling	Stationary point count	8	3	7	0.3	6.614	6.314	21.0467	21.0467
schooling	Stationary point count	8	3	7	0.3	5.553	5.253	17.51	17.51
schooling	Stationary point count	8	3	7	0.3	6.189	5.889	19.63	19.63
schooling	Stationary point count	8	3	7	0.3	3.537	3.237	10.79	10.79
schooling	Stationary point count	8	3	7	0.3	3.749	3.449	11.4967	11.4967
schooling	Stationary point count	8	3	7	0.3	5.517	5.217	17.39	17.39
schooling	Stationary point count	8	3	7	0.3	6.472	6.172	20.5733	20.5733
schooling	Stationary point count	8	3	9	0.3	7.887	7.587	25.29	25.29
schooling	Stationary point count	8	3	9	0.3	4.916	4.616	15.3867	15.3867
schooling	Stationary point count	8	3	9	0.3	6.154	5.854	19.5133	19.5133
schooling	Stationary point count	8	3	9	0.3	7.321	7.021	23.4033	23.4033
schooling	Stationary point count	8	3	9	0.3	7.003	6.703	22.3433	22.3433
schooling	Stationary point count	8	3	9	0.3	6.543	6.243	20.81	20.81
schooling	Stationary point count	8	3	9	0.3	4.35	4.05	13.5	13.5
schooling	Stationary point count	8	3	9	0.3	7.463	7.163	23.8767	23.8767
schooling	Stationary point count	8	3	9	0.3	8.594	8.294	27.6467	27.6467
schooling	Stationary point count	8	3	9	0.3	8.488	8.188	27.2933	27.2933
schooling	Stationary point count	8	3	11	0.3	7.038	6.738	22.46	22.46
schooling	Stationary point count	8	3	11	0.3	8.736	8.436	28.12	28.12
schooling	Stationary point count	8	3	11	0.3	8.17	7.87	26.2333	26.2333
schooling	Stationary point count	8	3	11	0.3	6.897	6.597	21.99	21.99
schooling	Stationary point count	8	3	11	0.3	8.842	8.542	28.4733	28.4733
schooling	Stationary point count	8	3	11	0.3	8.7	8.4	28	28
schooling	Stationary point count	8	3	11	0.3	6.932	6.632	22.1067	22.1067
schooling	Stationary point count	8	3	11	0.3	8.524	8.224	27.4133	27.4133
schooling	Stationary point count	8	3	11	0.3	7.356	7.056	23.52	23.52
schooling	Stationary point count	8	3	11	0.3	10.999	10.699	35.6633	35.6633
schooling	Stationary point count	8	4	3	0.3	2.308	2.008	6.69333	6.69333
schooling	Stationary point count	8	4	3	0.3	1.373	1.073	3.57667	3.57667
schooling	Stationary point count	8	4	3	0.3	1.512	1.212	4.04	4.04
schooling	Stationary point count	8	4	3	0.3	2.089	1.789	5.96333	5.96333
schooling	Stationary point count	8	4	3	0.3	1.751	1.451	4.83667	4.83667
schooling	Stationary point count	8	4	3	0.3	2.626	2.326	7.75333	7.75333
schooling	Stationary point count	8	4	3	0.3	1.194	0.894	2.98	2.98
schooling	Stationary point count	8	4	3	0.3	1.074	0.774	2.58	2.58
schooling	Stationary point count	8	4	3	0.3	1.79	1.49	4.96667	4.96667
schooling	Stationary point count	8	4	3	0.3	2.168	1.868	6.22667	6.22667
schooling	Stationary point count	8	4	5	0.3	3.024	2.724	9.08	9.08
schooling	Stationary point count	8	4	5	0.3	3.82	3.52	11.7333	11.7333
schooling	Stationary point count	8	4	5	0.3	2.964	2.664	8.88	8.88
schooling	Stationary point count	8	4	5	0.3	3.203	2.903	9.67667	9.67667
schooling	Stationary point count	8	4	5	0.3	3.183	2.883	9.61	9.61
schooling	Stationary point count	8	4	5	0.3	2.427	2.127	7.09	7.09
schooling	Stationary point count	8	4	5	0.3	3.462	3.162	10.54	10.54
schooling	Stationary point count	8	4	5	0.3	3.342	3.042	10.14	10.14
schooling	Stationary point count	8	4	5	0.3	3.382	3.082	10.2733	10.2733
schooling	Stationary point count	8	4	5	0.3	1.89	1.59	5.3	5.3
schooling	Stationary point count	8	4	7	0.3	4.954	4.654	15.5133	15.5133
schooling	Stationary point count	8	4	7	0.3	4.993	4.693	15.6433	15.6433
schooling	Stationary point count	8	4	7	0.3	4.198	3.898	12.9933	12.9933
schooling	Stationary point count	8	4	7	0.3	4.675	4.375	14.5833	14.5833
schooling	Stationary point count	8	4	7	0.3	4.934	4.634	15.4467	15.4467
schooling	Stationary point count	8	4	7	0.3	4.238	3.938	13.1267	13.1267
schooling	Stationary point count	8	4	7	0.3	2.765	2.465	8.21667	8.21667
schooling	Stationary point count	8	4	7	0.3	3.104	2.804	9.34667	9.34667
schooling	Stationary point count	8	4	7	0.3	4.178	3.878	12.9267	12.9267
schooling	Stationary point count	8	4	7	0.3	4.377	4.077	13.59	13.59
schooling	Stationary point count	8	4	9	0.3	5.033	4.733	15.7767	15.7767
schooling	Stationary point count	8	4	9	0.3	6.824	6.524	21.7467	21.7467
schooling	Stationary point count	8	4	9	0.3	6.127	5.827	19.4233	19.4233
schooling	Stationary point count	8	4	9	0.3	6.724	6.424	21.4133	21.4133
schooling	Stationary point count	8	4	9	0.3	3.402	3.102	10.34	10.34
schooling	Stationary point count	8	4	9	0.3	5.073	4.773	15.91	15.91
schooling	Stationary point count	8	4	9	0.3	4.775	4.475	14.9167	14.9167
schooling	Stationary point count	8	4	9	0.3	6.008	5.708	19.0267	19.0267
schooling	Stationary point count	8	4	9	0.3	4.735	4.435	14.7833	14.7833
schooling	Stationary point count	8	4	9	0.3	5.551	5.251	17.5033	17.5033
schooling	Stationary point count	8	4	11	0.3	6.665	6.365	21.2167	21.2167
schooling	Stationary point count	8	4	11	0.3	5.332	5.032	16.7733	16.7733
schooling	Stationary point count	8	4	11	0.3	8.356	8.056	26.8533	26.8533
schooling	Stationary point count	8	4	11	0.3	8.316	8.016	26.72	26.72
schooling	Stationary point count	8	4	11	0.3	7.639	7.339	24.4633	24.4633
schooling	Stationary point count	8	4	11	0.3	5.769	5.469	18.23	18.23
schooling	Stationary point count	8	4	11	0.3	8.117	7.817	26.0567	26.0567
schooling	Stationary point count	8	4	11	0.3	3.024	2.724	9.08	9.08
schooling	Stationary point count	8	4	11	0.3	7.162	6.862	22.8733	22.8733
schooling	Stationary point count	8	4	11	0.3	5.113	4.813	16.0433	16.0433
schooling	Stationary point count	8	5	3	0.3	1.299	0.999	3.33	3.33
schooling	Stationary point count	8	5	3	0.3	1.031	0.731	2.43667	2.43667
schooling	Stationary point count	8	5	3	0.3	1.286	0.986	3.28667	3.28667
schooling	Stationary point count	8	5	3	0.3	1.044	0.744	2.48	2.48
schooling	Stationary point count	8	5	3	0.3	0.815	0.515	1.71667	1.71667
schooling	Stationary point count	8	5	3	0.3	1.286	0.986	3.28667	3.28667
schooling	Stationary point count	8	5	3	0.3	1.222	0.922	3.07333	3.07333
schooling	Stationary point count	8	5	3	0.3	0.993	0.693	2.31	2.31
schooling	Stationary point count	8	5	3	0.3	0.688	0.388	1.29333	1.29333
schooling	Stationary point count	8	5	3	0.3	1.07	0.77	2.56667	2.56667
schooling	Stationary point count	8	5	5	0.3	2.61	2.31	7.7	7.7
schooling	Stationary point count	8	5	5	0.3	2.101	1.801	6.00333	6.00333
schooling	Stationary point count	8	5	5	0.3	1.311	1.011	3.37	3.37
schooling	Stationary point count	8	5	5	0.3	1.821	1.521	5.07	5.07
schooling	Stationary point count	8	5	5	0.3	1.63	1.33	4.43333	4.43333
schooling	Stationary point count	8	5	5	0.3	1.974	1.674	5.58	5.58
schooling	Stationary point count	8	5	5	0.3	2.432	2.132	7.10667	7.10667
schooling	Stationary point count	8	5	5	0.3	1.668	1.368	4.56	4.56
schooling	Stationary point count	8	5	5	0.3	1.783	1.483	4.94333	4.94333
schooling	Stationary point count	8	5	5	0.3	1.502	1.202	4.00667	4.00667
schooling	Stationary point count	8	5	7	0.3	3.31	3.01	10.0333	10.0333
schooling	Stationary point count	8	5	7	0.3	2.648	2.348	7.82667	7.82667
schooling	Stationary point count	8	5	7	0.3	2.636	2.336	7.78667	7.78667
schooling	Stationary point count	8	5	7	0.3	2.967	2.667	8.89	8.89
schooling	Stationary point count	8	5	7	0.3	3.132	2.832	9.44	9.44
schooling	Stationary point count	8	5	7	0.3	2.241	1.941	6.47	6.47
schooling	Stationary point count	8	5	7	0.3	2.381	2.081	6.93667	6.93667
schooling	Stationary point count	8	5	7	0.3	1.961	1.661	5.53667	5.53667
schooling	Stationary point count	8	5	7	0.3	2.725	2.425	8.08333	8.08333
schooling	Stationary point count	8	5	7	0.3	3.565	3.265	10.8833	10.8833
schooling	Stationary point count	8	5	9	0.3	3.234	2.934	9.78	9.78
schooling	Stationary point count	8	5	9	0.3	2.967	2.667	8.89	8.89
schooling	Stationary point count	8	5	9	0.3	3.743	3.443	11.4767	11.4767
schooling	Stationary point count	8	5	9	0.3	2.954	2.654	8.84667	8.84667
schooling	Stationary point count	8	5	9	0.3	3.629	3.329	11.0967	11.0967
schooling	Stationary point count	8	5	9	0.3	3.68	3.38	11.2667	11.2667
schooling	Stationary point count	8	5	9	0.3	3.985	3.685	12.2833	12.2833
schooling	Stationary point count	8	5	9	0.3	3.323	3.023	10.0767	10.0767
schooling	Stationary point count	8	5	9	0.3	4.036	3.736	12.4533	12.4533
schooling	Stationary point count	8	5	9	0.3	2.827	2.527	8.42333	8.42333
schooling	Stationary point count	8	5	11	0.3	4.138	3.838	12.7933	12.7933
schooling	Stationary point count	8	5	11	0.3	4.036	3.736	12.4533	12.4533
schooling	Stationary point count	8	5	11	0.3	4.393	4.093	13.6433	13.6433
schooling	Stationary point count	8	5	11	0.3	3.336	3.036	10.12	10.12
schooling	Stationary point count	8	5	11	0.3	4.151	3.851	12.8367	12.8367
schooling	Stationary point count	8	5	11	0.3	2.967	2.667	8.89	8.89
schooling	Stationary point count	8	5	11	0.3	5.195	4.895	16.3167	16.3167
schooling	Stationary point count	8	5	11	0.3	3.349	3.049	10.1633	10.1633
schooling	Stationary point count	8	5	11	0.3	3.947	3.647	12.1567	12.1567
schooling	Stationary point count	8	5	11	0.3	3.985	3.685	12.2833	12.2833
schooling	Stationary point count	10	1	3	0.3	1.91	1.61	5.36667	5.36667
schooling	Stationary point count	10	1	3	0.3	0.318	0.018	0.06	0.06
schooling	Stationary point count	10	1	3	0.3	4.138	3.838	12.7933	12.7933
schooling	Stationary point count	10	1	3	0.3	3.82	3.52	11.7333	11.7333
schooling	Stationary point count	10	1	3	0.3	0	-0.3	-1	1
schooling	Stationary point count	10	1	3	0.3	2.228	1.928	6.42667	6.42667
schooling	Stationary point count	10	1	3	0.3	4.775	4.475	14.9167	14.9167
schooling	Stationary point count	10	1	3	0.3	0.318	0.018	0.06	0.06
schooling	Stationary point count	10	1	3	0.3	1.273	0.973	3.24333	3.24333
schooling	Stationary point count	10	1	3	0.3	0.637	0.337	1.12333	1.12333
schooling	Stationary point count	10	1	5	0.3	1.91	1.61	5.36667	5.36667
schooling	Stationary point count	10	1	5	0.3	1.273	0.973	3.24333	3.24333
schooling	Stationary point count	10	1	5	0.3	0.955	0.655	2.18333	2.18333
schooling	Stationary point count	10	1	5	0.3	3.501	3.201	10.67	10.67
schooling	Stationary point count	10	1	5	0.3	0.637	0.337	1.12333	1.12333
schooling	Stationary point count	10	1	5	0.3	1.273	0.973	3.24333	3.24333
schooling	Stationary point count	10	1	5	0.3	1.592	1.292	4.30667	4.30667
schooling	Stationary point count	10	1	5	0.3	2.865	2.565	8.55	8.55
schooling	Stationary point count	10	1	5	0.3	3.183	2.883	9.61	9.61
schooling	Stationary point count	10	1	5	0.3	1.91	1.61	5.36667	5.36667
schooling	Stationary point count	10	1	7	0.3	3.501	3.201	10.67	10.67
schooling	Stationary point count	10	1	7	0.3	7.003	6.703	22.3433	22.3433
schooling	Stationary point count	10	1	7	0.3	5.093	4.793	15.9767	15.9767
schooling	Stationary point count	10	1	7	0.3	1.91	1.61	5.36667	5.36667
schooling	Stationary point count	10	1	7	0.3	2.228	1.928	6.42667	6.42667
schooling	Stationary point count	10	1	7	0.3	3.82	3.52	11.7333	11.7333
schooling	Stationary point count	10	1	7	0.3	3.501	3.201	10.67	10.67
schooling	Stationary point count	10	1	7	0.3	4.775	4.475	14.9167	14.9167
schooling	Stationary point count	10	1	7	0.3	5.411	5.111	17.0367	17.0367
schooling	Stationary point count	10	1	7	0.3	7.958	7.658	25.5267	25.5267
schooling	Stationary point count	10	1	9	0.3	4.456	4.156	13.8533	13.8533
schooling	Stationary point count	10	1	9	0.3	12.096	11.796	39.32	39.32
schooling	Stationary point count	10	1	9	0.3	0.955	0.655	2.18333	2.18333
schooling	Stationary point count	10	1	9	0.3	4.456	4.156	13.8533	13.8533
schooling	Stationary point count	10	1	9	0.3	6.048	5.748	19.16	19.16
schooling	Stationary point count	10	1	9	0.3	3.82	3.52	11.7333	11.7333
schooling	Stationary point count	10	1	9	0.3	2.228	1.928	6.42667	6.42667
schooling	Stationary point count	10	1	9	0.3	6.048	5.748	19.16	19.16
schooling	Stationary point count	10	1	9	0.3	5.093	4.793	15.9767	15.9767
schooling	Stationary point count	10	1	9	0.3	5.093	4.793	15.9767	15.9767
schooling	Stationary point count	10	1	11	0.3	7.003	6.703	22.3433	22.3433
schooling	Stationary point count	10	1	11	0.3	5.73	5.43	18.1	18.1
schooling	Stationary point count	10	1	11	0.3	5.093	4.793	15.9767	15.9767
schooling	Stationary point count	10	1	11	0.3	4.775	4.475	14.9167	14.9167
schooling	Stationary point count	10	1	11	0.3	7.639	7.339	24.4633	24.4633
schooling	Stationary point count	10	1	11	0.3	2.546	2.246	7.48667	7.48667
schooling	Stationary point count	10	1	11	0.3	4.456	4.156	13.8533	13.8533
schooling	Stationary point count	10	1	11	0.3	1.91	1.61	5.36667	5.36667
schooling	Stationary point count	10	1	11	0.3	9.231	8.931	29.77	29.77
schooling	Stationary point count	10	1	11	0.3	3.183	2.883	9.61	9.61
schooling	Stationary point count	10	2	3	0.3	2.069	1.769	5.89667	5.89667
schooling	Stationary point count	10	2	3	0.3	1.194	0.894	2.98	2.98
schooling	Stationary point count	10	2	3	0.3	2.228	1.928	6.42667	6.42667
schooling	Stationary point count	10	2	3	0.3	1.114	0.814	2.71333	2.71333
schooling	Stationary point count	10	2	3	0.3	3.263	2.963	9.87667	9.87667
schooling	Stationary point count	10	2	3	0.3	1.91	1.61	5.36667	5.36667
schooling	Stationary point count	10	2	3	0.3	1.83	1.53	5.1	5.1
schooling	Stationary point count	10	2	3	0.3	2.228	1.928	6.42667	6.42667
schooling	Stationary point count	10	2	3	0.3	3.183	2.883	9.61	9.61
schooling	Stationary point count	10	2	3	0.3	1.671	1.371	4.57	4.57
schooling	Stationary point count	10	2	5	0.3	2.308	2.008	6.69333	6.69333
schooling	Stationary point count	10	2	5	0.3	3.263	2.963	9.87667	9.87667
schooling	Stationary point count	10	2	5	0.3	3.422	3.122	10.4067	10.4067
schooling	Stationary point count	10	2	5	0.3	2.706	2.406	8.02	8.02
schooling	Stationary point count	10	2	5	0.3	2.228	1.928	6.42667	6.42667
schooling	Stationary point count	10	2	5	0.3	6.525	6.225	20.75	20.75
schooling	Stationary point count	10	2	5	0.3	3.979	3.679	12.2633	12.2633
schooling	Stationary point count	10	2	5	0.3	4.138	3.838	12.7933	12.7933
schooling	Stationary point count	10	2	5	0.3	2.069	1.769	5.89667	5.89667
schooling	Stationary point count	10	2	5	0.3	3.581	3.281	10.9367	10.9367
schooling	Stationary point count	10	2	7	0.3	8.196	7.896	26.32	26.32
schooling	Stationary point count	10	2	7	0.3	4.854	4.554	15.18	15.18
schooling	Stationary point count	10	2	7	0.3	7.878	7.578	25.26	25.26
schooling	Stationary point count	10	2	7	0.3	3.581	3.281	10.9367	10.9367
schooling	Stationary point count	10	2	7	0.3	8.515	8.215	27.3833	27.3833
schooling	Stationary point count	10	2	7	0.3	8.833	8.533	28.4433	28.4433
schooling	Stationary point count	10	2	7	0.3	3.661	3.361	11.2033	11.2033
schooling	Stationary point count	10	2	7	0.3	5.73	5.43	18.1	18.1
schooling	Stationary point count	10	2	7	0.3	3.581	3.281	10.9367	10.9367
schooling	Stationary point count	10	2	7	0.3	3.183	2.883	9.61	9.61
schooling	Stationary point count	10	2	9	0.3	7.799	7.499	24.9967	24.9967
schooling	Stationary point count	10	2	9	0.3	11.937	11.637	38.79	38.79
schooling	Stationary point count	10	2	9	0.3	7.401	7.101	23.67	23.67
schooling	Stationary point count	10	2	9	0.3	11.22	10.92	36.4	36.4
schooling	Stationary point count	10	2	9	0.3	9.072	8.772	29.24	29.24
schooling	Stationary point count	10	2	9	0.3	6.207	5.907	19.69	19.69
schooling	Stationary point count	10	2	9	0.3	6.923	6.623	22.0767	22.0767
schooling	Stationary point count	10	2	9	0.3	8.196	7.896	26.32	26.32
schooling	Stationary point count	10	2	9	0.3	5.013	4.713	15.71	15.71
schooling	Stationary point count	10	2	9	0.3	14.085	13.785	45.95	45.95
schooling	Stationary point count	10	2	11	0.3	9.868	9.568	31.8933	31.8933
schooling	Stationary point count	10	2	11	0.3	7.162	6.862	22.8733	22.8733
schooling	Stationary point count	10	2	11	0.3	9.788	9.488	31.6267	31.6267
schooling	Stationary point count	10	2	11	0.3	11.937	11.637	38.79	38.79
schooling	Stationary point count	10	2	11	0.3	7.48	7.18	23.9333	23.9333
schooling	Stationary point count	10	2	11	0.3	10.265	9.965	33.2167	33.2167
schooling	Stationary point count	10	2	11	0.3	5.57	5.27	17.5667	17.5667
schooling	Stationary point count	10	2	11	0.3	10.663	10.363	34.5433	34.5433
schooling	Stationary point count	10	2	11	0.3	5.57	5.27	17.5667	17.5667
schooling	Stationary point count	10	2	11	0.3	11.459	11.159	37.1967	37.1967
schooling	Stationary point count	10	3	3	0.3	2.476	2.176	7.25333	7.25333
schooling	Stationary point count	10	3	3	0.3	2.688	2.388	7.96	7.96
schooling	Stationary point count	10	3	3	0.3	2.582	2.282	7.60667	7.60667
schooling	Stationary point count	10	3	3	0.3	1.167	0.867	2.89	2.89
schooling	Stationary point count	10	3	3	0.3	2.405	2.105	7.01667	7.01667
schooling	Stationary point count	10	3	3	0.3	1.981	1.681	5.60333	5.60333
schooling	Stationary point count	10	3	3	0.3	2.334	2.034	6.78	6.78
schooling	Stationary point count	10	3	3	0.3	2.511	2.211	7.37	7.37
schooling	Stationary point count	10	3	3	0.3	1.945	1.645	5.48333	5.48333
schooling	Stationary point count	10	3	3	0.3	1.698	1.398	4.66	4.66
schooling	Stationary point count	10	3	5	0.3	2.476	2.176	7.25333	7.25333
schooling	Stationary point count	10	3	5	0.3	5.093	4.793	15.9767	15.9767
schooling	Stationary point count	10	3	5	0.3	4.315	4.015	13.3833	13.3833
schooling	Stationary point count	10	3	5	0.3	4.138	3.838	12.7933	12.7933
schooling	Stationary point count	10	3	5	0.3	4.81	4.51	15.0333	15.0333
schooling	Stationary point count	10	3	5	0.3	4.315	4.015	13.3833	13.3833
schooling	Stationary point count	10	3	5	0.3	5.553	5.253	17.51	17.51
schooling	Stationary point count	10	3	5	0.3	3.218	2.918	9.72667	9.72667
schooling	Stationary point count	10	3	5	0.3	2.334	2.034	6.78	6.78
schooling	Stationary point count	10	3	5	0.3	4.244	3.944	13.1467	13.1467
schooling	Stationary point count	10	3	7	0.3	4.386	4.086	13.62	13.62
schooling	Stationary point count	10	3	7	0.3	8.594	8.294	27.6467	27.6467
schooling	Stationary point count	10	3	7	0.3	6.791	6.491	21.6367	21.6367
schooling	Stationary point count	10	3	7	0.3	4.987	4.687	15.6233	15.6233
schooling	Stationary point count	10	3	7	0.3	6.614	6.314	21.0467	21.0467
schooling	Stationary point count	10	3	7	0.3	5.8	5.5	18.3333	18.3333
schooling	Stationary point count	10	3	7	0.3	4.775	4.475	14.9167	14.9167
schooling	Stationary point count	10	3	7	0.3	4.845	4.545	15.15	15.15
schooling	Stationary point count	10	3	7	0.3	7.286	6.986	23.2867	23.2867
schooling	Stationary point count	10	3	7	0.3	5.093	4.793	15.9767	15.9767
schooling	Stationary point count	10	3	9	0.3	5.517	5.217	17.39	17.39
schooling	Stationary point count	10	3	9	0.3	7.392	7.092	23.64	23.64
schooling	Stationary point count	10	3	9	0.3	5.906	5.606	18.6867	18.6867
schooling	Stationary point count	10	3	9	0.3	6.402	6.102	20.34	20.34
schooling	Stationary point count	10	3	9	0.3	6.26	5.96	19.8667	19.8667
schooling	Stationary point count	10	3	9	0.3	6.932	6.632	22.1067	22.1067
schooling	Stationary point count	10	3	9	0.3	4.951	4.651	15.5033	15.5033
schooling	Stationary point count	10	3	9	0.3	7.215	6.915	23.05	23.05
schooling	Stationary point count	10	3	9	0.3	9.408	9.108	30.36	30.36
schooling	Stationary point count	10	3	9	0.3	8.028	7.728	25.76	25.76
schooling	Stationary point count	10	3	11	0.3	11.813	11.513	38.3767	38.3767
schooling	Stationary point count	10	3	11	0.3	9.797	9.497	31.6567	31.6567
schooling	Stationary point count	10	3	11	0.3	8.771	8.471	28.2367	28.2367
schooling	Stationary point count	10	3	11	0.3	5.694	5.394	17.98	17.98
schooling	Stationary point count	10	3	11	0.3	7.816	7.516	25.0533	25.0533
schooling	Stationary point count	10	3	11	0.3	7.463	7.163	23.8767	23.8767
schooling	Stationary point count	10	3	11	0.3	7.18	6.88	22.9333	22.9333
schooling	Stationary point count	10	3	11	0.3	9.196	8.896	29.6533	29.6533
schooling	Stationary point count	10	3	11	0.3	8.453	8.153	27.1767	27.1767
schooling	Stationary point count	10	3	11	0.3	8.807	8.507	28.3567	28.3567
schooling	Stationary point count	10	4	3	0.3	1.97	1.67	5.56667	5.56667
schooling	Stationary point count	10	4	3	0.3	2.487	2.187	7.29	7.29
schooling	Stationary point count	10	4	3	0.3	2.487	2.187	7.29	7.29
schooling	Stationary point count	10	4	3	0.3	2.069	1.769	5.89667	5.89667
schooling	Stationary point count	10	4	3	0.3	1.85	1.55	5.16667	5.16667
schooling	Stationary point count	10	4	3	0.3	1.532	1.232	4.10667	4.10667
schooling	Stationary point count	10	4	3	0.3	1.97	1.67	5.56667	5.56667
schooling	Stationary point count	10	4	3	0.3	1.751	1.451	4.83667	4.83667
schooling	Stationary point count	10	4	3	0.3	1.751	1.451	4.83667	4.83667
schooling	Stationary point count	10	4	3	0.3	2.288	1.988	6.62667	6.62667
schooling	Stationary point count	10	4	5	0.3	2.049	1.749	5.83	5.83
schooling	Stationary point count	10	4	5	0.3	3.123	2.823	9.41	9.41
schooling	Stationary point count	10	4	5	0.3	3.422	3.122	10.4067	10.4067
schooling	Stationary point count	10	4	5	0.3	3.322	3.022	10.0733	10.0733
schooling	Stationary point count	10	4	5	0.3	3.86	3.56	11.8667	11.8667
schooling	Stationary point count	10	4	5	0.3	3.044	2.744	9.14667	9.14667
schooling	Stationary point count	10	4	5	0.3	4.675	4.375	14.5833	14.5833
schooling	Stationary point count	10	4	5	0.3	2.944	2.644	8.81333	8.81333
schooling	Stationary point count	10	4	5	0.3	2.845	2.545	8.48333	8.48333
schooling	Stationary point count	10	4	5	0.3	4.337	4.037	13.4567	13.4567
schooling	Stationary point count	10	4	7	0.3	6.088	5.788	19.2933	19.2933
schooling	Stationary point count	10	4	7	0.3	5.093	4.793	15.9767	15.9767
schooling	Stationary point count	10	4	7	0.3	5.153	4.853	16.1767	16.1767
schooling	Stationary point count	10	4	7	0.3	4.795	4.495	14.9833	14.9833
schooling	Stationary point count	10	4	7	0.3	3.86	3.56	11.8667	11.8667
schooling	Stationary point count	10	4	7	0.3	6.187	5.887	19.6233	19.6233
schooling	Stationary point count	10	4	7	0.3	3.263	2.963	9.87667	9.87667
schooling	Stationary point count	10	4	7	0.3	3.223	2.923	9.74333	9.74333
schooling	Stationary point count	10	4	7	0.3	5.252	4.952	16.5067	16.5067
schooling	Stationary point count	10	4	7	0.3	3.661	3.361	11.2033	11.2033
schooling	Stationary point count	10	4	9	0.3	5.73	5.43	18.1	18.1
schooling	Stationary point count	10	4	9	0.3	6.665	6.365	21.2167	21.2167
schooling	Stationary point count	10	4	9	0.3	6.446	6.146	20.4867	20.4867
schooling	Stationary point count	10	4	9	0.3	6.784	6.484	21.6133	21.6133
schooling	Stationary point count	10	4	9	0.3	4.834	4.534	15.1133	15.1133
schooling	Stationary point count	10	4	9	0.3	4.596	4.296	14.32	14.32
schooling	Stationary point count	10	4	9	0.3	5.252	4.952	16.5067	16.5067
schooling	Stationary point count	10	4	9	0.3	4.834	4.534	15.1133	15.1133
schooling	Stationary point count	10	4	9	0.3	6.605	6.305	21.0167	21.0167
schooling	Stationary point count	10	4	9	0.3	8.216	7.916	26.3867	26.3867
schooling	Stationary point count	10	4	11	0.3	6.685	6.385	21.2833	21.2833
schooling	Stationary point count	10	4	11	0.3	5.133	4.833	16.11	16.11
schooling	Stationary point count	10	4	11	0.3	5.511	5.211	17.37	17.37
schooling	Stationary point count	10	4	11	0.3	7.003	6.703	22.3433	22.3433
schooling	Stationary point count	10	4	11	0.3	5.252	4.952	16.5067	16.5067
schooling	Stationary point count	10	4	11	0.3	6.625	6.325	21.0833	21.0833
schooling	Stationary point count	10	4	11	0.3	5.272	4.972	16.5733	16.5733
schooling	Stationary point count	10	4	11	0.3	7.301	7.001	23.3367	23.3367
schooling	Stationary point count	10	4	11	0.3	7.182	6.882	22.94	22.94
schooling	Stationary point count	10	4	11	0.3	6.545	6.245	20.8167	20.8167
schooling	Stationary point count	10	5	3	0.3	0.968	0.668	2.22667	2.22667
schooling	Stationary point count	10	5	3	0.3	1.133	0.833	2.77667	2.77667
schooling	Stationary point count	10	5	3	0.3	1.413	1.113	3.71	3.71
schooling	Stationary point count	10	5	3	0.3	1.413	1.113	3.71	3.71
schooling	Stationary point count	10	5	3	0.3	0.942	0.642	2.14	2.14
schooling	Stationary point count	10	5	3	0.3	1.464	1.164	3.88	3.88
schooling	Stationary point count	10	5	3	0.3	1.057	0.757	2.52333	2.52333
schooling	Stationary point count	10	5	3	0.3	1.362	1.062	3.54	3.54
schooling	Stationary point count	10	5	3	0.3	1.451	1.151	3.83667	3.83667
schooling	Stationary point count	10	5	3	0.3	1.248	0.948	3.16	3.16
schooling	Stationary point count	10	5	5	0.3	2.126	1.826	6.08667	6.08667
schooling	Stationary point count	10	5	5	0.3	2.623	2.323	7.74333	7.74333
schooling	Stationary point count	10	5	5	0.3	2.114	1.814	6.04667	6.04667
schooling	Stationary point count	10	5	5	0.3	2.47	2.17	7.23333	7.23333
schooling	Stationary point count	10	5	5	0.3	1.884	1.584	5.28	5.28
schooling	Stationary point count	10	5	5	0.3	1.477	1.177	3.92333	3.92333
schooling	Stationary point count	10	5	5	0.3	1.49	1.19	3.96667	3.96667
schooling	Stationary point count	10	5	5	0.3	1.502	1.202	4.00667	4.00667
schooling	Stationary point count	10	5	5	0.3	2.012	1.712	5.70667	5.70667
schooling	Stationary point count	10	5	5	0.3	1.553	1.253	4.17667	4.17667
schooling	Stationary point count	10	5	7	0.3	2.534	2.234	7.44667	7.44667
schooling	Stationary point count	10	5	7	0.3	2.534	2.234	7.44667	7.44667
schooling	Stationary point count	10	5	7	0.3	3.909	3.609	12.03	12.03
schooling	Stationary point count	10	5	7	0.3	3.119	2.819	9.39667	9.39667
schooling	Stationary point count	10	5	7	0.3	3.769	3.469	11.5633	11.5633
schooling	Stationary point count	10	5	7	0.3	2.292	1.992	6.64	6.64
schooling	Stationary point count	10	5	7	0.3	2.546	2.246	7.48667	7.48667
schooling	Stationary point count	10	5	7	0.3	3.234	2.934	9.78	9.78
schooling	Stationary point count	10	5	7	0.3	2.381	2.081	6.93667	6.93667
schooling	Stationary point count	10	5	7	0.3	2.241	1.941	6.47	6.47
schooling	Stationary point count	10	5	9	0.3	3.463	3.163	10.5433	10.5433
schooling	Stationary point count	10	5	9	0.3	4.864	4.564	15.2133	15.2133
schooling	Stationary point count	10	5	9	0.3	4.049	3.749	12.4967	12.4967
schooling	Stationary point count	10	5	9	0.3	3.692	3.392	11.3067	11.3067
schooling	Stationary point count	10	5	9	0.3	4.673	4.373	14.5767	14.5767
schooling	Stationary point count	10	5	9	0.3	3.654	3.354	11.18	11.18
schooling	Stationary point count	10	5	9	0.3	3.514	3.214	10.7133	10.7133
schooling	Stationary point count	10	5	9	0.3	2.827	2.527	8.42333	8.42333
schooling	Stationary point count	10	5	9	0.3	4.087	3.787	12.6233	12.6233
schooling	Stationary point count	10	5	9	0.3	3.476	3.176	10.5867	10.5867
schooling	Stationary point count	10	5	11	0.3	5.959	5.659	18.8633	18.8633
schooling	Stationary point count	10	5	11	0.3	3.056	2.756	9.18667	9.18667
schooling	Stationary point count	10	5	11	0.3	3.552	3.252	10.84	10.84
schooling	Stationary point count	10	5	11	0.3	5.475	5.175	17.25	17.25
schooling	Stationary point count	10	5	11	0.3	5.653	5.353	17.8433	17.8433
schooling	Stationary point count	10	5	11	0.3	3.259	2.959	9.86333	9.86333
schooling	Stationary point count	10	5	11	0.3	4.176	3.876	12.92	12.92
schooling	Stationary point count	10	5	11	0.3	5.806	5.506	18.3533	18.3533
schooling	Stationary point count	10	5	11	0.3	6.392	6.092	20.3067	20.3067
schooling	Stationary point count	10	5	11	0.3	4.978	4.678	15.5933	15.5933
cryptic	Stationary point count	2	1	3	0.3	1.592	1.292	4.30667	4.30667
cryptic	Stationary point count	2	1	3	0.3	1.273	0.973	3.24333	3.24333
cryptic	Stationary point count	2	1	3	0.3	1.273	0.973	3.24333	3.24333
cryptic	Stationary point count	2	1	3	0.3	0.637	0.337	1.12333	1.12333
cryptic	Stationary point count	2	1	3	0.3	0.318	0.018	0.06	0.06
cryptic	Stationary point count	2	1	3	0.3	1.273	0.973	3.24333	3.24333
cryptic	Stationary point count	2	1	3	0.3	0	-0.3	-1	1
cryptic	Stationary point count	2	1	3	0.3	0.955	0.655	2.18333	2.18333
cryptic	Stationary point count	2	1	3	0.3	1.273	0.973	3.24333	3.24333
cryptic	Stationary point count	2	1	3	0.3	0.955	0.655	2.18333	2.18333
cryptic	Stationary point count	2	1	5	0.3	0.318	0.018	0.06	0.06
cryptic	Stationary point count	2	1	5	0.3	2.865	2.565	8.55	8.55
cryptic	Stationary point count	2	1	5	0.3	2.546	2.246	7.48667	7.48667
cryptic	Stationary point count	2	1	5	0.3	1.592	1.292	4.30667	4.30667
cryptic	Stationary point count	2	1	5	0.3	0	-0.3	-1	1
cryptic	Stationary point count	2	1	5	0.3	2.546	2.246	7.48667	7.48667
cryptic	Stationary point count	2	1	5	0.3	1.91	1.61	5.36667	5.36667
cryptic	Stationary point count	2	1	5	0.3	0	-0.3	-1	1
cryptic	Stationary point count	2	1	5	0.3	0.318	0.018	0.06	0.06
cryptic	Stationary point count	2	1	5	0.3	1.91	1.61	5.36667	5.36667
cryptic	Stationary point count	2	1	7	0.3	1.592	1.292	4.30667	4.30667
cryptic	Stationary point count	2	1	7	0.3	1.273	0.973	3.24333	3.24333
cryptic	Stationary point count	2	1	7	0.3	0.955	0.655	2.18333	2.18333
cryptic	Stationary point count	2	1	7	0.3	0.955	0.655	2.18333	2.18333
cryptic	Stationary point count	2	1	7	0.3	1.273	0.973	3.24333	3.24333
cryptic	Stationary point count	2	1	7	0.3	1.592	1.292	4.30667	4.30667
cryptic	Stationary point count	2	1	7	0.3	1.273	0.973	3.24333	3.24333
cryptic	Stationary point count	2	1	7	0.3	0	-0.3	-1	1
cryptic	Stationary point count	2	1	7	0.3	0.955	0.655	2.18333	2.18333
cryptic	Stationary point count	2	1	7	0.3	0.955	0.655	2.18333	2.18333
cryptic	Stationary point count	2	1	9	0.3	0.955	0.655	2.18333	2.18333
cryptic	Stationary point count	2	1	9	0.3	3.82	3.52	11.7333	11.7333
cryptic	Stationary point count	2	1	9	0.3	5.093	4.793	15.9767	15.9767
cryptic	Stationary point count	2	1	9	0.3	3.82	3.52	11.7333	11.7333
cryptic	Stationary point count	2	1	9	0.3	2.546	2.246	7.48667	7.48667
cryptic	Stationary point count	2	1	9	0.3	7.003	6.703	22.3433	22.3433
cryptic	Stationary point count	2	1	9	0.3	0.637	0.337	1.12333	1.12333
cryptic	Stationary point count	2	1	9	0.3	1.273	0.973	3.24333	3.24333
cryptic	Stationary point count	2	1	9	0.3	1.273	0.973	3.24333	3.24333
cryptic	Stationary point count	2	1	9	0.3	1.592	1.292	4.30667	4.30667
cryptic	Stationary point count	2	1	11	0.3	2.865	2.565	8.55	8.55
cryptic	Stationary point count	2	1	11	0.3	2.546	2.246	7.48667	7.48667
cryptic	Stationary point count	2	1	11	0.3	2.546	2.246	7.48667	7.48667
cryptic	Stationary point count	2	1	11	0.3	0.955	0.655	2.18333	2.18333
cryptic	Stationary point count	2	1	11	0.3	3.501	3.201	10.67	10.67
cryptic	Stationary point count	2	1	11	0.3	0.318	0.018	0.06	0.06
cryptic	Stationary point count	2	1	11	0.3	0.318	0.018	0.06	0.06
cryptic	Stationary point count	2	1	11	0.3	5.73	5.43	18.1	18.1
cryptic	Stationary point count	2	1	11	0.3	2.546	2.246	7.48667	7.48667
cryptic	Stationary point count	2	1	11	0.3	4.775	4.475	14.9167	14.9167
cryptic	Stationary point count	2	2	3	0.3	0.239	-0.061	-0.203333	0.203333
cryptic	Stationary point count	2	2	3	0.3	0.398	0.098	0.326667	0.326667
cryptic	Stationary point count	2	2	3	0.3	0.477	0.177	0.59	0.59
cryptic	Stationary point count	2	2	3	0.3	0.159	-0.141	-0.47	0.47
cryptic	Stationary point count	2	2	3	0.3	0.08	-0.22	-0.733333	0.733333
cryptic	Stationary point count	2	2	3	0.3	0.318	0.018	0.06	0.06
cryptic	Stationary point count	2	2	3	0.3	0.159	-0.141	-0.47	0.47
cryptic	Stationary point count	2	2	3	0.3	0.159	-0.141	-0.47	0.47
cryptic	Stationary point count	2	2	3	0.3	0.159	-0.141	-0.47	0.47
cryptic	Stationary point count	2	2	3	0.3	0.398	0.098	0.326667	0.326667
cryptic	Stationary point count	2	2	5	0.3	0.08	-0.22	-0.733333	0.733333
cryptic	Stationary point count	2	2	5	0.3	0.318	0.018	0.06	0.06
cryptic	Stationary point count	2	2	5	0.3	0.159	-0.141	-0.47	0.47
cryptic	Stationary point count	2	2	5	0.3	0.239	-0.061	-0.203333	0.203333
cryptic	Stationary point count	2	2	5	0.3	0.637	0.337	1.12333	1.12333
cryptic	Stationary point count	2	2	5	0.3	0.477	0.177	0.59	0.59
cryptic	Stationary point count	2	2	5	0.3	0.318	0.018	0.06	0.06
cryptic	Stationary point count	2	2	5	0.3	0.318	0.018	0.06	0.06
cryptic	Stationary point count	2	2	5	0.3	0.239	-0.061	-0.203333	0.203333
cryptic	Stationary point count	2	2	5	0.3	0.477	0.177	0.59	0.59
cryptic	Stationary point count	2	2	7	0.3	0.318	0.018	0.06	0.06
cryptic	Stationary point count	2	2	7	0.3	0	-0.3	-1	1
cryptic	Stationary point count	2	2	7	0.3	0.398	0.098	0.326667	0.326667
cryptic	Stationary point count	2	2	7	0.3	0.477	0.177	0.59	0.59
cryptic	Stationary point count	2	2	7	0.3	0.398	0.098	0.326667	0.326667
cryptic	Stationary point count	2	2	7	0.3	0.08	-0.22	-0.733333	0.733333
cryptic	Stationary point count	2	2	7	0.3	0	-0.3	-1	1
cryptic	Stationary point count	2	2	7	0.3	0.557	0.257	0.856667	0.856667
cryptic	Stationary point count	2	2	7	0.3	0.477	0.177	0.59	0.59
cryptic	Stationary point count	2	2	7	0.3	0.239	-0.061	-0.203333	0.203333
cryptic	Stationary point count	2	2	9	0.3	0.557	0.257	0.856667	0.856667
cryptic	Stationary point count	2	2	9	0.3	1.114	0.814	2.71333	2.71333
cryptic	Stationary point count	2	2	9	0.3	1.273	0.973	3.24333	3.24333
cryptic	Stationary point count	2	2	9	0.3	0.796	0.496	1.65333	1.65333
cryptic	Stationary point count	2	2	9	0.3	0.637	0.337	1.12333	1.12333
cryptic	Stationary point count	2	2	9	0.3	0.716	0.416	1.38667	1.38667
cryptic	Stationary point count	2	2	9	0.3	1.273	0.973	3.24333	3.24333
cryptic	Stationary point count	2	2	9	0.3	0.159	-0.141	-0.47	0.47
cryptic	Stationary point count	2	2	9	0.3	0.716	0.416	1.38667	1.38667
cryptic	Stationary point count	2	2	9	0.3	0.159	-0.141	-0.47	0.47
cryptic	Stationary point count	2	2	11	0.3	0	-0.3	-1	1
cryptic	Stationary point count	2	2	11	0.3	0.557	0.257	0.856667	0.856667
cryptic	Stationary point count	2	2	11	0.3	1.035	0.735	2.45	2.45
cryptic	Stationary point count	2	2	11	0.3	0	-0.3	-1	1
cryptic	Stationary point count	2	2	11	0.3	0.875	0.575	1.91667	1.91667
cryptic	Stationary point count	2	2	11	0.3	1.035	0.735	2.45	2.45
cryptic	Stationary point count	2	2	11	0.3	1.353	1.053	3.51	3.51
cryptic	Stationary point count	2	2	11	0.3	0.557	0.257	0.856667	0.856667
cryptic	Stationary point count	2	2	11	0.3	1.432	1.132	3.77333	3.77333
cryptic	Stationary point count	2	2	11	0.3	0.557	0.257	0.856667	0.856667
cryptic	Stationary point count	2	3	3	0.3	0.106	-0.194	-0.646667	0.646667
cryptic	Stationary point count	2	3	3	0.3	0.106	-0.194	-0.646667	0.646667
cryptic	Stationary point count	2	3	3	0.3	0.106	-0.194	-0.646667	0.646667
cryptic	Stationary point count	2	3	3	0.3	0.071	-0.229	-0.763333	0.763333
cryptic	Stationary point count	2	3	3	0.3	0	-0.3	-1	1
cryptic	Stationary point count	2	3	3	0.3	0.071	-0.229	-0.763333	0.763333
cryptic	Stationary point count	2	3	3	0.3	0.106	-0.194	-0.646667	0.646667
cryptic	Stationary point count	2	3	3	0.3	0	-0.3	-1	1
cryptic	Stationary point count	2	3	3	0.3	0.035	-0.265	-0.883333	0.883333
cryptic	Stationary point count	2	3	3	0.3	0.071	-0.229	-0.763333	0.763333
cryptic	Stationary point count	2	3	5	0.3	0.424	0.124	0.413333	0.413333
cryptic	Stationary point count	2	3	5	0.3	0.071	-0.229	-0.763333	0.763333
cryptic	Stationary point count	2	3	5	0.3	0.106	-0.194	-0.646667	0.646667
cryptic	Stationary point count	2	3	5	0.3	0.035	-0.265	-0.883333	0.883333
cryptic	Stationary point count	2	3	5	0.3	0.354	0.054	0.18	0.18
cryptic	Stationary point count	2	3	5	0.3	0.212	-0.088	-0.293333	0.293333
cryptic	Stationary point count	2	3	5	0.3	0.177	-0.123	-0.41	0.41
cryptic	Stationary point count	2	3	5	0.3	0.035	-0.265	-0.883333	0.883333
cryptic	Stationary point count	2	3	5	0.3	0	-0.3	-1	1
cryptic	Stationary point count	2	3	5	0.3	0.035	-0.265	-0.883333	0.883333
cryptic	Stationary point count	2	3	7	0.3	0.283	-0.017	-0.0566667	0.0566667
cryptic	Stationary point count	2	3	7	0.3	0.141	-0.159	-0.53	0.53
cryptic	Stationary point count	2	3	7	0.3	0.141	-0.159	-0.53	0.53
cryptic	Stationary point count	2	3	7	0.3	0.354	0.054	0.18	0.18
cryptic	Stationary point count	2	3	7	0.3	0.071	-0.229	-0.763333	0.763333
cryptic	Stationary point count	2	3	7	0.3	0.071	-0.229	-0.763333	0.763333
cryptic	Stationary point count	2	3	7	0.3	0.424	0.124	0.413333	0.413333
cryptic	Stationary point count	2	3	7	0.3	0.071	-0.229	-0.763333	0.763333
cryptic	Stationary point count	2	3	7	0.3	0.106	-0.194	-0.646667	0.646667
cryptic	Stationary point count	2	3	7	0.3	0.212	-0.088	-0.293333	0.293333
cryptic	Stationary point count	2	3	9	0.3	0.283	-0.017	-0.0566667	0.0566667
cryptic	Stationary point count	2	3	9	0.3	0.248	-0.052	-0.173333	0.173333
cryptic	Stationary point count	2	3	9	0.3	0	-0.3	-1	1
cryptic	Stationary point count	2	3	9	0.3	0.283	-0.017	-0.0566667	0.0566667
cryptic	Stationary point count	2	3	9	0.3	0.601	0.301	1.00333	1.00333
cryptic	Stationary point count	2	3	9	0.3	0.743	0.443	1.47667	1.47667
cryptic	Stationary point count	2	3	9	0.3	0.248	-0.052	-0.173333	0.173333
cryptic	Stationary point count	2	3	9	0.3	0.389	0.089	0.296667	0.296667
cryptic	Stationary point count	2	3	9	0.3	0.177	-0.123	-0.41	0.41
cryptic	Stationary point count	2	3	9	0.3	0.071	-0.229	-0.763333	0.763333
cryptic	Stationary point count	2	3	11	0.3	0.495	0.195	0.65	0.65
cryptic	Stationary point count	2	3	11	0.3	0.035	-0.265	-0.883333	0.883333
cryptic	Stationary point count	2	3	11	0.3	0.212	-0.088	-0.293333	0.293333
cryptic	Stationary point count	2	3	11	0.3	0.354	0.054	0.18	0.18
cryptic	Stationary point count	2	3	11	0.3	0.672	0.372	1.24	1.24
cryptic	Stationary point count	2	3	11	0.3	0.46	0.16	0.533333	0.533333
cryptic	Stationary point count	2	3	11	0.3	0.389	0.089	0.296667	0.296667
cryptic	Stationary point count	2	3	11	0.3	0.389	0.089	0.296667	0.296667
cryptic	Stationary point count	2	3	11	0.3	0.177	-0.123	-0.41	0.41
cryptic	Stationary point count	2	3	11	0.3	0.248	-0.052	-0.173333	0.173333
cryptic	Stationary point count	2	4	3	0.3	0.099	-0.201	-0.67	0.67
cryptic	Stationary point count	2	4	3	0.3	0.06	-0.24	-0.8	0.8
cryptic	Stationary point count	2	4	3	0.3	0.06	-0.24	-0.8	0.8
cryptic	Stationary point count	2	4	3	0.3	0.06	-0.24	-0.8	0.8
cryptic	Stationary point count	2	4	3	0.3	0.04	-0.26	-0.866667	0.866667
cryptic	Stationary point count	2	4	3	0.3	0.099	-0.201	-0.67	0.67
cryptic	Stationary point count	2	4	3	0.3	0.099	-0.201	-0.67	0.67
cryptic	Stationary point count	2	4	3	0.3	0	-0.3	-1	1
cryptic	Stationary point count	2	4	3	0.3	0.119	-0.181	-0.603333	0.603333
cryptic	Stationary point count	2	4	3	0.3	0.08	-0.22	-0.733333	0.733333
cryptic	Stationary point count	2	4	5	0.3	0.06	-0.24	-0.8	0.8
cryptic	Stationary point count	2	4	5	0.3	0.06	-0.24	-0.8	0.8
cryptic	Stationary point count	2	4	5	0.3	0.139	-0.161	-0.536667	0.536667
cryptic	Stationary point count	2	4	5	0.3	0	-0.3	-1	1
cryptic	Stationary point count	2	4	5	0.3	0.04	-0.26	-0.866667	0.866667
cryptic	Stationary point count	2	4	5	0.3	0.099	-0.201	-0.67	0.67
cryptic	Stationary point count	2	4	5	0.3	0.02	-0.28	-0.933333	0.933333
cryptic	Stationary point count	2	4	5	0.3	0.08	-0.22	-0.733333	0.733333
cryptic	Stationary point count	2	4	5	0.3	0.08	-0.22	-0.733333	0.733333
cryptic	Stationary point count	2	4	5	0.3	0	-0.3	-1	1
cryptic	Stationary point count	2	4	7	0.3	0.08	-0.22	-0.733333	0.733333
cryptic	Stationary point count	2	4	7	0.3	0.239	-0.061	-0.203333	0.203333
cryptic	Stationary point count	2	4	7	0.3	0.179	-0.121	-0.403333	0.403333
cryptic	Stationary point count	2	4	7	0.3	0.06	-0.24	-0.8	0.8
cryptic	Stationary point count	2	4	7	0.3	0.119	-0.181	-0.603333	0.603333
cryptic	Stationary point count	2	4	7	0.3	0.099	-0.201	-0.67	0.67
cryptic	Stationary point count	2	4	7	0.3	0.179	-0.121	-0.403333	0.403333
cryptic	Stationary point count	2	4	7	0.3	0.139	-0.161	-0.536667	0.536667
cryptic	Stationary point count	2	4	7	0.3	0.099	-0.201	-0.67	0.67
cryptic	Stationary point count	2	4	7	0.3	0.06	-0.24	-0.8	0.8
cryptic	Stationary point count	2	4	9	0.3	0.259	-0.041	-0.136667	0.136667
cryptic	Stationary point count	2	4	9	0.3	0.259	-0.041	-0.136667	0.136667
cryptic	Stationary point count	2	4	9	0.3	0.259	-0.041	-0.136667	0.136667
cryptic	Stationary point count	2	4	9	0.3	0.179	-0.121	-0.403333	0.403333
cryptic	Stationary point count	2	4	9	0.3	0.179	-0.121	-0.403333	0.403333
cryptic	Stationary point count	2	4	9	0.3	0.099	-0.201	-0.67	0.67
cryptic	Stationary point count	2	4	9	0.3	0.159	-0.141	-0.47	0.47
cryptic	Stationary point count	2	4	9	0.3	0.239	-0.061	-0.203333	0.203333
cryptic	Stationary point count	2	4	9	0.3	0.219	-0.081	-0.27	0.27
cryptic	Stationary point count	2	4	9	0.3	0.119	-0.181	-0.603333	0.603333
cryptic	Stationary point count	2	4	11	0.3	0.06	-0.24	-0.8	0.8
cryptic	Stationary point count	2	4	11	0.3	0.139	-0.161	-0.536667	0.536667
cryptic	Stationary point count	2	4	11	0.3	0.119	-0.181	-0.603333	0.603333
cryptic	Stationary point count	2	4	11	0.3	0.099	-0.201	-0.67	0.67
cryptic	Stationary point count	2	4	11	0.3	0.119	-0.181	-0.603333	0.603333
cryptic	Stationary point count	2	4	11	0.3	0.02	-0.28	-0.933333	0.933333
cryptic	Stationary point count	2	4	11	0.3	0.04	-0.26	-0.866667	0.866667
cryptic	Stationary point count	2	4	11	0.3	0.159	-0.141	-0.47	0.47
cryptic	Stationary point count	2	4	11	0.3	0.08	-0.22	-0.733333	0.733333
cryptic	Stationary point count	2	4	11	0.3	0.02	-0.28	-0.933333	0.933333
cryptic	Stationary point count	2	5	3	0.3	0.102	-0.198	-0.66	0.66
cryptic	Stationary point count	2	5	3	0.3	0.038	-0.262	-0.873333	0.873333
cryptic	Stationary point count	2	5	3	0.3	0.025	-0.275	-0.916667	0.916667
cryptic	Stationary point count	2	5	3	0.3	0.013	-0.287	-0.956667	0.956667
cryptic	Stationary point count	2	5	3	0.3	0.064	-0.236	-0.786667	0.786667
cryptic	Stationary point count	2	5	3	0.3	0.051	-0.249	-0.83	0.83
cryptic	Stationary point count	2	5	3	0.3	0.025	-0.275	-0.916667	0.916667
cryptic	Stationary point count	2	5	3	0.3	0.038	-0.262	-0.873333	0.873333
cryptic	Stationary point count	2	5	3	0.3	0.013	-0.287	-0.956667	0.956667
cryptic	Stationary point count	2	5	3	0.3	0	-0.3	-1	1
cryptic	Stationary point count	2	5	5	0.3	0.038	-0.262	-0.873333	0.873333
cryptic	Stationary point count	2	5	5	0.3	0.025	-0.275	-0.916667	0.916667
cryptic	Stationary point count	2	5	5	0.3	0.064	-0.236	-0.786667	0.786667
cryptic	Stationary point count	2	5	5	0.3	0.038	-0.262	-0.873333	0.873333
cryptic	Stationary point count	2	5	5	0.3	0.051	-0.249	-0.83	0.83
cryptic	Stationary point count	2	5	5	0.3	0.076	-0.224	-0.746667	0.746667
cryptic	Stationary point count	2	5	5	0.3	0.064	-0.236	-0.786667	0.786667
cryptic	Stationary point count	2	5	5	0.3	0	-0.3	-1	1
cryptic	Stationary point count	2	5	5	0.3	0.064	-0.236	-0.786667	0.786667
cryptic	Stationary point count	2	5	5	0.3	0	-0.3	-1	1
cryptic	Stationary point count	2	5	7	0.3	0.115	-0.185	-0.616667	0.616667
cryptic	Stationary point count	2	5	7	0.3	0.038	-0.262	-0.873333	0.873333
cryptic	Stationary point count	2	5	7	0.3	0.064	-0.236	-0.786667	0.786667
cryptic	Stationary point count	2	5	7	0.3	0.013	-0.287	-0.956667	0.956667
cryptic	Stationary point count	2	5	7	0.3	0.089	-0.211	-0.703333	0.703333
cryptic	Stationary point count	2	5	7	0.3	0.127	-0.173	-0.576667	0.576667
cryptic	Stationary point count	2	5	7	0.3	0.076	-0.224	-0.746667	0.746667
cryptic	Stationary point count	2	5	7	0.3	0.013	-0.287	-0.956667	0.956667
cryptic	Stationary point count	2	5	7	0.3	0.051	-0.249	-0.83	0.83
cryptic	Stationary point count	2	5	7	0.3	0.204	-0.096	-0.32	0.32
cryptic	Stationary point count	2	5	9	0.3	0.089	-0.211	-0.703333	0.703333
cryptic	Stationary point count	2	5	9	0.3	0.115	-0.185	-0.616667	0.616667
cryptic	Stationary point count	2	5	9	0.3	0.051	-0.249	-0.83	0.83
cryptic	Stationary point count	2	5	9	0.3	0.14	-0.16	-0.533333	0.533333
cryptic	Stationary point count	2	5	9	0.3	0	-0.3	-1	1
cryptic	Stationary point count	2	5	9	0.3	0.013	-0.287	-0.956667	0.956667
cryptic	Stationary point count	2	5	9	0.3	0.204	-0.096	-0.32	0.32
cryptic	Stationary point count	2	5	9	0.3	0.051	-0.249	-0.83	0.83
cryptic	Stationary point count	2	5	9	0.3	0.115	-0.185	-0.616667	0.616667
cryptic	Stationary point count	2	5	9	0.3	0.025	-0.275	-0.916667	0.916667
cryptic	Stationary point count	2	5	11	0.3	0.166	-0.134	-0.446667	0.446667
cryptic	Stationary point count	2	5	11	0.3	0.051	-0.249	-0.83	0.83
cryptic	Stationary point count	2	5	11	0.3	0.064	-0.236	-0.786667	0.786667
cryptic	Stationary point count	2	5	11	0.3	0.076	-0.224	-0.746667	0.746667
cryptic	Stationary point count	2	5	11	0.3	0.076	-0.224	-0.746667	0.746667
cryptic	Stationary point count	2	5	11	0.3	0.191	-0.109	-0.363333	0.363333
cryptic	Stationary point count	2	5	11	0.3	0.038	-0.262	-0.873333	0.873333
cryptic	Stationary point count	2	5	11	0.3	0	-0.3	-1	1
cryptic	Stationary point count	2	5	11	0.3	0.089	-0.211	-0.703333	0.703333
cryptic	Stationary point count	2	5	11	0.3	0.255	-0.045	-0.15	0.15
cryptic	Stationary point count	4	1	3	0.3	0.955	0.655	2.18333	2.18333
cryptic	Stationary point count	4	1	3	0.3	1.592	1.292	4.30667	4.30667
cryptic	Stationary point count	4	1	3	0.3	1.592	1.292	4.30667	4.30667
cryptic	Stationary point count	4	1	3	0.3	0.955	0.655	2.18333	2.18333
cryptic	Stationary point count	4	1	3	0.3	2.546	2.246	7.48667	7.48667
cryptic	Stationary point count	4	1	3	0.3	0.955	0.655	2.18333	2.18333
cryptic	Stationary point count	4	1	3	0.3	0.637	0.337	1.12333	1.12333
cryptic	Stationary point count	4	1	3	0.3	1.592	1.292	4.30667	4.30667
cryptic	Stationary point count	4	1	3	0.3	1.273	0.973	3.24333	3.24333
cryptic	Stationary point count	4	1	3	0.3	2.865	2.565	8.55	8.55
cryptic	Stationary point count	4	1	5	0.3	2.865	2.565	8.55	8.55
cryptic	Stationary point count	4	1	5	0.3	0.955	0.655	2.18333	2.18333
cryptic	Stationary point count	4	1	5	0.3	1.273	0.973	3.24333	3.24333
cryptic	Stationary point count	4	1	5	0.3	1.91	1.61	5.36667	5.36667
cryptic	Stationary point count	4	1	5	0.3	1.91	1.61	5.36667	5.36667
cryptic	Stationary point count	4	1	5	0.3	3.501	3.201	10.67	10.67
cryptic	Stationary point count	4	1	5	0.3	1.91	1.61	5.36667	5.36667
cryptic	Stationary point count	4	1	5	0.3	3.183	2.883	9.61	9.61
cryptic	Stationary point count	4	1	5	0.3	0.318	0.018	0.06	0.06
cryptic	Stationary point count	4	1	5	0.3	0	-0.3	-1	1
cryptic	Stationary point count	4	1	7	0.3	2.546	2.246	7.48667	7.48667
cryptic	Stationary point count	4	1	7	0.3	0.955	0.655	2.18333	2.18333
cryptic	Stationary point count	4	1	7	0.3	0.637	0.337	1.12333	1.12333
cryptic	Stationary point count	4	1	7	0.3	0.955	0.655	2.18333	2.18333
cryptic	Stationary point count	4	1	7	0.3	2.865	2.565	8.55	8.55
cryptic	Stationary point count	4	1	7	0.3	1.91	1.61	5.36667	5.36667
cryptic	Stationary point count	4	1	7	0.3	2.546	2.246	7.48667	7.48667
cryptic	Stationary point count	4	1	7	0.3	3.501	3.201	10.67	10.67
cryptic	Stationary point count	4	1	7	0.3	1.592	1.292	4.30667	4.30667
cryptic	Stationary point count	4	1	7	0.3	3.183	2.883	9.61	9.61
cryptic	Stationary point count	4	1	9	0.3	2.546	2.246	7.48667	7.48667
cryptic	Stationary point count	4	1	9	0.3	1.91	1.61	5.36667	5.36667
cryptic	Stationary point count	4	1	9	0.3	0.955	0.655	2.18333	2.18333
cryptic	Stationary point count	4	1	9	0.3	4.456	4.156	13.8533	13.8533
cryptic	Stationary point count	4	1	9	0.3	6.048	5.748	19.16	19.16
cryptic	Stationary point count	4	1	9	0.3	2.228	1.928	6.42667	6.42667
cryptic	Stationary point count	4	1	9	0.3	0.637	0.337	1.12333	1.12333
cryptic	Stationary point count	4	1	9	0.3	4.456	4.156	13.8533	13.8533
cryptic	Stationary point count	4	1	9	0.3	2.228	1.928	6.42667	6.42667
cryptic	Stationary point count	4	1	9	0.3	1.91	1.61	5.36667	5.36667
cryptic	Stationary point count	4	1	11	0.3	1.91	1.61	5.36667	5.36667
cryptic	Stationary point count	4	1	11	0.3	3.82	3.52	11.7333	11.7333
cryptic	Stationary point count	4	1	11	0.3	1.273	0.973	3.24333	3.24333
cryptic	Stationary point count	4	1	11	0.3	2.865	2.565	8.55	8.55
cryptic	Stationary point count	4	1	11	0.3	1.592	1.292	4.30667	4.30667
cryptic	Stationary point count	4	1	11	0.3	4.138	3.838	12.7933	12.7933
cryptic	Stationary point count	4	1	11	0.3	3.82	3.52	11.7333	11.7333
cryptic	Stationary point count	4	1	11	0.3	1.273	0.973	3.24333	3.24333
cryptic	Stationary point count	4	1	11	0.3	2.865	2.565	8.55	8.55
cryptic	Stationary point count	4	1	11	0.3	6.366	6.066	20.22	20.22
cryptic	Stationary point count	4	2	3	0.3	0.159	-0.141	-0.47	0.47
cryptic	Stationary point count	4	2	3	0.3	0.08	-0.22	-0.733333	0.733333
cryptic	Stationary point count	4	2	3	0.3	0.318	0.018	0.06	0.06
cryptic	Stationary point count	4	2	3	0.3	0.159	-0.141	-0.47	0.47
cryptic	Stationary point count	4	2	3	0.3	0.318	0.018	0.06	0.06
cryptic	Stationary point count	4	2	3	0.3	0.239	-0.061	-0.203333	0.203333
cryptic	Stationary point count	4	2	3	0.3	0	-0.3	-1	1
cryptic	Stationary point count	4	2	3	0.3	0	-0.3	-1	1
cryptic	Stationary point count	4	2	3	0.3	0	-0.3	-1	1
cryptic	Stationary point count	4	2	3	0.3	0.239	-0.061	-0.203333	0.203333
cryptic	Stationary point count	4	2	5	0.3	0.159	-0.141	-0.47	0.47
cryptic	Stationary point count	4	2	5	0.3	0.716	0.416	1.38667	1.38667
cryptic	Stationary point count	4	2	5	0.3	0.239	-0.061	-0.203333	0.203333
cryptic	Stationary point count	4	2	5	0.3	0.557	0.257	0.856667	0.856667
cryptic	Stationary point count	4	2	5	0.3	0.239	-0.061	-0.203333	0.203333
cryptic	Stationary point count	4	2	5	0.3	0.318	0.018	0.06	0.06
cryptic	Stationary point count	4	2	5	0.3	0.239	-0.061	-0.203333	0.203333
cryptic	Stationary point count	4	2	5	0.3	0.955	0.655	2.18333	2.18333
cryptic	Stationary point count	4	2	5	0.3	0.637	0.337	1.12333	1.12333
cryptic	Stationary point count	4	2	5	0.3	0.477	0.177	0.59	0.59
cryptic	Stationary point count	4	2	7	0.3	0.557	0.257	0.856667	0.856667
cryptic	Stationary point count	4	2	7	0.3	0.637	0.337	1.12333	1.12333
cryptic	Stationary point count	4	2	7	0.3	0.239	-0.061	-0.203333	0.203333
cryptic	Stationary point count	4	2	7	0.3	0.637	0.337	1.12333	1.12333
cryptic	Stationary point count	4	2	7	0.3	0.318	0.018	0.06	0.06
cryptic	Stationary point count	4	2	7	0.3	0.398	0.098	0.326667	0.326667
cryptic	Stationary point count	4	2	7	0.3	0.239	-0.061	-0.203333	0.203333
cryptic	Stationary point count	4	2	7	0.3	1.353	1.053	3.51	3.51
cryptic	Stationary point count	4	2	7	0.3	0.318	0.018	0.06	0.06
cryptic	Stationary point count	4	2	7	0.3	1.114	0.814	2.71333	2.71333
cryptic	Stationary point count	4	2	9	0.3	0.398	0.098	0.326667	0.326667
cryptic	Stationary point count	4	2	9	0.3	1.194	0.894	2.98	2.98
cryptic	Stationary point count	4	2	9	0.3	0.637	0.337	1.12333	1.12333
cryptic	Stationary point count	4	2	9	0.3	0.557	0.257	0.856667	0.856667
cryptic	Stationary point count	4	2	9	0.3	1.83	1.53	5.1	5.1
cryptic	Stationary point count	4	2	9	0.3	0.637	0.337	1.12333	1.12333
cryptic	Stationary point count	4	2	9	0.3	0.477	0.177	0.59	0.59
cryptic	Stationary point count	4	2	9	0.3	0.08	-0.22	-0.733333	0.733333
cryptic	Stationary point count	4	2	9	0.3	0.557	0.257	0.856667	0.856667
cryptic	Stationary point count	4	2	9	0.3	0	-0.3	-1	1
cryptic	Stationary point count	4	2	11	0.3	0.875	0.575	1.91667	1.91667
cryptic	Stationary point count	4	2	11	0.3	1.512	1.212	4.04	4.04
cryptic	Stationary point count	4	2	11	0.3	0.955	0.655	2.18333	2.18333
cryptic	Stationary point count	4	2	11	0.3	0.477	0.177	0.59	0.59
cryptic	Stationary point count	4	2	11	0.3	0.398	0.098	0.326667	0.326667
cryptic	Stationary point count	4	2	11	0.3	0.159	-0.141	-0.47	0.47
cryptic	Stationary point count	4	2	11	0.3	1.592	1.292	4.30667	4.30667
cryptic	Stationary point count	4	2	11	0.3	1.751	1.451	4.83667	4.83667
cryptic	Stationary point count	4	2	11	0.3	0.955	0.655	2.18333	2.18333
cryptic	Stationary point count	4	2	11	0.3	0.875	0.575	1.91667	1.91667
cryptic	Stationary point count	4	3	3	0.3	0.248	-0.052	-0.173333	0.173333
cryptic	Stationary point count	4	3	3	0.3	0.212	-0.088	-0.293333	0.293333
cryptic	Stationary point count	4	3	3	0.3	0.212	-0.088	-0.293333	0.293333
cryptic	Stationary point count	4	3	3	0.3	0.071	-0.229	-0.763333	0.763333
cryptic	Stationary point count	4	3	3	0.3	0.071	-0.229	-0.763333	0.763333
cryptic	Stationary point count	4	3	3	0.3	0.141	-0.159	-0.53	0.53
cryptic	Stationary point count	4	3	3	0.3	0.035	-0.265	-0.883333	0.883333
cryptic	Stationary point count	4	3	3	0.3	0.141	-0.159	-0.53	0.53
cryptic	Stationary point count	4	3	3	0.3	0.141	-0.159	-0.53	0.53
cryptic	Stationary point count	4	3	3	0.3	0.106	-0.194	-0.646667	0.646667
cryptic	Stationary point count	4	3	5	0.3	0.248	-0.052	-0.173333	0.173333
cryptic	Stationary point count	4	3	5	0.3	0.177	-0.123	-0.41	0.41
cryptic	Stationary point count	4	3	5	0.3	0.035	-0.265	-0.883333	0.883333
cryptic	Stationary point count	4	3	5	0.3	0.141	-0.159	-0.53	0.53
cryptic	Stationary point count	4	3	5	0.3	0.141	-0.159	-0.53	0.53
cryptic	Stationary point count	4	3	5	0.3	0.071	-0.229	-0.763333	0.763333
cryptic	Stationary point count	4	3	5	0.3	0.248	-0.052	-0.173333	0.173333
cryptic	Stationary point count	4	3	5	0.3	0.035	-0.265	-0.883333	0.883333
cryptic	Stationary point count	4	3	5	0.3	0	-0.3	-1	1
cryptic	Stationary point count	4	3	5	0.3	0.177	-0.123	-0.41	0.41
cryptic	Stationary point count	4	3	7	0.3	0.318	0.018	0.06	0.06
cryptic	Stationary point count	4	3	7	0.3	0	-0.3	-1	1
cryptic	Stationary point count	4	3	7	0.3	0.177	-0.123	-0.41	0.41
cryptic	Stationary point count	4	3	7	0.3	0.141	-0.159	-0.53	0.53
cryptic	Stationary point count	4	3	7	0.3	0.141	-0.159	-0.53	0.53
cryptic	Stationary point count	4	3	7	0.3	0.177	-0.123	-0.41	0.41
cryptic	Stationary point count	4	3	7	0.3	0.884	0.584	1.94667	1.94667
cryptic	Stationary point count	4	3	7	0.3	0.248	-0.052	-0.173333	0.173333
cryptic	Stationary point count	4	3	7	0.3	0.141	-0.159	-0.53	0.53
cryptic	Stationary point count	4	3	7	0.3	0.106	-0.194	-0.646667	0.646667
cryptic	Stationary point count	4	3	9	0.3	0.495	0.195	0.65	0.65
cryptic	Stationary point count	4	3	9	0.3	0.212	-0.088	-0.293333	0.293333
cryptic	Stationary point count	4	3	9	0.3	0.495	0.195	0.65	0.65
cryptic	Stationary point count	4	3	9	0.3	0.141	-0.159	-0.53	0.53
cryptic	Stationary point count	4	3	9	0.3	0.531	0.231	0.77	0.77
cryptic	Stationary point count	4	3	9	0.3	0.46	0.16	0.533333	0.533333
cryptic	Stationary point count	4	3	9	0.3	0.389	0.089	0.296667	0.296667
cryptic	Stationary point count	4	3	9	0.3	0.424	0.124	0.413333	0.413333
cryptic	Stationary point count	4	3	9	0.3	0.424	0.124	0.413333	0.413333
cryptic	Stationary point count	4	3	9	0.3	0.354	0.054	0.18	0.18
cryptic	Stationary point count	4	3	11	0.3	0.354	0.054	0.18	0.18
cryptic	Stationary point count	4	3	11	0.3	0.177	-0.123	-0.41	0.41
cryptic	Stationary point count	4	3	11	0.3	0.141	-0.159	-0.53	0.53
cryptic	Stationary point count	4	3	11	0.3	0.212	-0.088	-0.293333	0.293333
cryptic	Stationary point count	4	3	11	0.3	0.672	0.372	1.24	1.24
cryptic	Stationary point count	4	3	11	0.3	0.212	-0.088	-0.293333	0.293333
cryptic	Stationary point count	4	3	11	0.3	0.601	0.301	1.00333	1.00333
cryptic	Stationary point count	4	3	11	0.3	0.46	0.16	0.533333	0.533333
cryptic	Stationary point count	4	3	11	0.3	0.318	0.018	0.06	0.06
cryptic	Stationary point count	4	3	11	0.3	0.495	0.195	0.65	0.65
cryptic	Stationary point count	4	4	3	0.3	0.099	-0.201	-0.67	0.67
cryptic	Stationary point count	4	4	3	0.3	0.08	-0.22	-0.733333	0.733333
cryptic	Stationary point count	4	4	3	0.3	0.02	-0.28	-0.933333	0.933333
cryptic	Stationary point count	4	4	3	0.3	0.099	-0.201	-0.67	0.67
cryptic	Stationary point count	4	4	3	0.3	0.02	-0.28	-0.933333	0.933333
cryptic	Stationary point count	4	4	3	0.3	0	-0.3	-1	1
cryptic	Stationary point count	4	4	3	0.3	0.06	-0.24	-0.8	0.8
cryptic	Stationary point count	4	4	3	0.3	0.08	-0.22	-0.733333	0.733333
cryptic	Stationary point count	4	4	3	0.3	0.119	-0.181	-0.603333	0.603333
cryptic	Stationary point count	4	4	3	0.3	0.06	-0.24	-0.8	0.8
cryptic	Stationary point count	4	4	5	0.3	0	-0.3	-1	1
cryptic	Stationary point count	4	4	5	0.3	0.119	-0.181	-0.603333	0.603333
cryptic	Stationary point count	4	4	5	0.3	0.04	-0.26	-0.866667	0.866667
cryptic	Stationary point count	4	4	5	0.3	0.099	-0.201	-0.67	0.67
cryptic	Stationary point count	4	4	5	0.3	0.04	-0.26	-0.866667	0.866667
cryptic	Stationary point count	4	4	5	0.3	0.04	-0.26	-0.866667	0.866667
cryptic	Stationary point count	4	4	5	0.3	0.139	-0.161	-0.536667	0.536667
cryptic	Stationary point count	4	4	5	0.3	0.099	-0.201	-0.67	0.67
cryptic	Stationary point count	4	4	5	0.3	0.06	-0.24	-0.8	0.8
cryptic	Stationary point count	4	4	5	0.3	0.06	-0.24	-0.8	0.8
cryptic	Stationary point count	4	4	7	0.3	0.06	-0.24	-0.8	0.8
cryptic	Stationary point count	4	4	7	0.3	0.119	-0.181	-0.603333	0.603333
cryptic	Stationary point count	4	4	7	0.3	0.04	-0.26	-0.866667	0.866667
cryptic	Stationary point count	4	4	7	0.3	0.06	-0.24	-0.8	0.8
cryptic	Stationary point count	4	4	7	0.3	0.119	-0.181	-0.603333	0.603333
cryptic	Stationary point count	4	4	7	0.3	0.298	-0.002	-0.00666667	0.00666667
cryptic	Stationary point count	4	4	7	0.3	0.179	-0.121	-0.403333	0.403333
cryptic	Stationary point count	4	4	7	0.3	0.239	-0.061	-0.203333	0.203333
cryptic	Stationary point count	4	4	7	0.3	0.08	-0.22	-0.733333	0.733333
cryptic	Stationary point count	4	4	7	0.3	0.08	-0.22	-0.733333	0.733333
cryptic	Stationary point count	4	4	9	0.3	0.02	-0.28	-0.933333	0.933333
cryptic	Stationary point count	4	4	9	0.3	0.239	-0.061	-0.203333	0.203333
cryptic	Stationary point count	4	4	9	0.3	0.119	-0.181	-0.603333	0.603333
cryptic	Stationary point count	4	4	9	0.3	0.199	-0.101	-0.336667	0.336667
cryptic	Stationary point count	4	4	9	0.3	0.378	0.078	0.26	0.26
cryptic	Stationary point count	4	4	9	0.3	0.219	-0.081	-0.27	0.27
cryptic	Stationary point count	4	4	9	0.3	0.02	-0.28	-0.933333	0.933333
cryptic	Stationary point count	4	4	9	0.3	0.477	0.177	0.59	0.59
cryptic	Stationary point count	4	4	9	0.3	0	-0.3	-1	1
cryptic	Stationary point count	4	4	9	0.3	0.298	-0.002	-0.00666667	0.00666667
cryptic	Stationary point count	4	4	11	0.3	0.099	-0.201	-0.67	0.67
cryptic	Stationary point count	4	4	11	0.3	0.477	0.177	0.59	0.59
cryptic	Stationary point count	4	4	11	0.3	0.04	-0.26	-0.866667	0.866667
cryptic	Stationary point count	4	4	11	0.3	0.179	-0.121	-0.403333	0.403333
cryptic	Stationary point count	4	4	11	0.3	0.279	-0.021	-0.07	0.07
cryptic	Stationary point count	4	4	11	0.3	0.02	-0.28	-0.933333	0.933333
cryptic	Stationary point count	4	4	11	0.3	0.298	-0.002	-0.00666667	0.00666667
cryptic	Stationary point count	4	4	11	0.3	0.119	-0.181	-0.603333	0.603333
cryptic	Stationary point count	4	4	11	0.3	0.08	-0.22	-0.733333	0.733333
cryptic	Stationary point count	4	4	11	0.3	0.139	-0.161	-0.536667	0.536667
cryptic	Stationary point count	4	5	3	0.3	0.115	-0.185	-0.616667	0.616667
cryptic	Stationary point count	4	5	3	0.3	0.089	-0.211	-0.703333	0.703333
cryptic	Stationary point count	4	5	3	0.3	0.102	-0.198	-0.66	0.66
cryptic	Stationary point count	4	5	3	0.3	0.013	-0.287	-0.956667	0.956667
cryptic	Stationary point count	4	5	3	0.3	0.038	-0.262	-0.873333	0.873333
cryptic	Stationary point count	4	5	3	0.3	0.127	-0.173	-0.576667	0.576667
cryptic	Stationary point count	4	5	3	0.3	0.038	-0.262	-0.873333	0.873333
cryptic	Stationary point count	4	5	3	0.3	0.051	-0.249	-0.83	0.83
cryptic	Stationary point count	4	5	3	0.3	0.127	-0.173	-0.576667	0.576667
cryptic	Stationary point count	4	5	3	0.3	0	-0.3	-1	1
cryptic	Stationary point count	4	5	5	0.3	0.191	-0.109	-0.363333	0.363333
cryptic	Stationary point count	4	5	5	0.3	0.064	-0.236	-0.786667	0.786667
cryptic	Stationary point count	4	5	5	0.3	0.038	-0.262	-0.873333	0.873333
cryptic	Stationary point count	4	5	5	0.3	0	-0.3	-1	1
cryptic	Stationary point count	4	5	5	0.3	0.102	-0.198	-0.66	0.66
cryptic	Stationary point count	4	5	5	0.3	0.102	-0.198	-0.66	0.66
cryptic	Stationary point count	4	5	5	0.3	0.064	-0.236	-0.786667	0.786667
cryptic	Stationary point count	4	5	5	0.3	0.051	-0.249	-0.83	0.83
cryptic	Stationary point count	4	5	5	0.3	0.089	-0.211	-0.703333	0.703333
cryptic	Stationary point count	4	5	5	0.3	0.102	-0.198	-0.66	0.66
cryptic	Stationary point count	4	5	7	0.3	0.293	-0.007	-0.0233333	0.0233333
cryptic	Stationary point count	4	5	7	0.3	0.038	-0.262	-0.873333	0.873333
cryptic	Stationary point count	4	5	7	0.3	0.038	-0.262	-0.873333	0.873333
cryptic	Stationary point count	4	5	7	0.3	0.115	-0.185	-0.616667	0.616667
cryptic	Stationary point count	4	5	7	0.3	0.089	-0.211	-0.703333	0.703333
cryptic	Stationary point count	4	5	7	0.3	0.115	-0.185	-0.616667	0.616667
cryptic	Stationary point count	4	5	7	0.3	0.102	-0.198	-0.66	0.66
cryptic	Stationary point count	4	5	7	0.3	0.076	-0.224	-0.746667	0.746667
cryptic	Stationary point count	4	5	7	0.3	0.013	-0.287	-0.956667	0.956667
cryptic	Stationary point count	4	5	7	0.3	0.013	-0.287	-0.956667	0.956667
cryptic	Stationary point count	4	5	9	0.3	0.229	-0.071	-0.236667	0.236667
cryptic	Stationary point count	4	5	9	0.3	0.14	-0.16	-0.533333	0.533333
cryptic	Stationary point count	4	5	9	0.3	0.025	-0.275	-0.916667	0.916667
cryptic	Stationary point count	4	5	9	0.3	0.038	-0.262	-0.873333	0.873333
cryptic	Stationary point count	4	5	9	0.3	0.089	-0.211	-0.703333	0.703333
cryptic	Stationary point count	4	5	9	0.3	0	-0.3	-1	1
cryptic	Stationary point count	4	5	9	0.3	0.178	-0.122	-0.406667	0.406667
cryptic	Stationary point count	4	5	9	0.3	0.191	-0.109	-0.363333	0.363333
cryptic	Stationary point count	4	5	9	0.3	0.013	-0.287	-0.956667	0.956667
cryptic	Stationary point count	4	5	9	0.3	0.064	-0.236	-0.786667	0.786667
cryptic	Stationary point count	4	5	11	0.3	0.102	-0.198	-0.66	0.66
cryptic	Stationary point count	4	5	11	0.3	0.102	-0.198	-0.66	0.66
cryptic	Stationary point count	4	5	11	0.3	0.025	-0.275	-0.916667	0.916667
cryptic	Stationary point count	4	5	11	0.3	0.013	-0.287	-0.956667	0.956667
cryptic	Stationary point count	4	5	11	0.3	0.127	-0.173	-0.576667	0.576667
cryptic	Stationary point count	4	5	11	0.3	0.178	-0.122	-0.406667	0.406667
cryptic	Stationary point count	4	5	11	0.3	0.178	-0.122	-0.406667	0.406667
cryptic	Stationary point count	4	5	11	0.3	0.229	-0.071	-0.236667	0.236667
cryptic	Stationary point count	4	5	11	0.3	0.14	-0.16	-0.533333	0.533333
cryptic	Stationary point count	4	5	11	0.3	0.115	-0.185	-0.616667	0.616667
cryptic	Stationary point count	6	1	3	0.3	0.955	0.655	2.18333	2.18333
cryptic	Stationary point count	6	1	3	0.3	0.318	0.018	0.06	0.06
cryptic	Stationary point count	6	1	3	0.3	0	-0.3	-1	1
cryptic	Stationary point count	6	1	3	0.3	0	-0.3	-1	1
cryptic	Stationary point count	6	1	3	0.3	0.955	0.655	2.18333	2.18333
cryptic	Stationary point count	6	1	3	0.3	0.318	0.018	0.06	0.06
cryptic	Stationary point count	6	1	3	0.3	0.637	0.337	1.12333	1.12333
cryptic	Stationary point count	6	1	3	0.3	1.273	0.973	3.24333	3.24333
cryptic	Stationary point count	6	1	3	0.3	2.228	1.928	6.42667	6.42667
cryptic	Stationary point count	6	1	3	0.3	0.955	0.655	2.18333	2.18333
cryptic	Stationary point count	6	1	5	0.3	2.228	1.928	6.42667	6.42667
cryptic	Stationary point count	6	1	5	0.3	1.592	1.292	4.30667	4.30667
cryptic	Stationary point count	6	1	5	0.3	1.273	0.973	3.24333	3.24333
cryptic	Stationary point count	6	1	5	0.3	0.955	0.655	2.18333	2.18333
cryptic	Stationary point count	6	1	5	0.3	1.592	1.292	4.30667	4.30667
cryptic	Stationary point count	6	1	5	0.3	1.592	1.292	4.30667	4.30667
cryptic	Stationary point count	6	1	5	0.3	0.637	0.337	1.12333	1.12333
cryptic	Stationary point count	6	1	5	0.3	2.865	2.565	8.55	8.55
cryptic	Stationary point count	6	1	5	0.3	5.093	4.793	15.9767	15.9767
cryptic	Stationary point count	6	1	5	0.3	1.91	1.61	5.36667	5.36667
cryptic	Stationary point count	6	1	7	0.3	4.456	4.156	13.8533	13.8533
cryptic	Stationary point count	6	1	7	0.3	3.501	3.201	10.67	10.67
cryptic	Stationary point count	6	1	7	0.3	1.273	0.973	3.24333	3.24333
cryptic	Stationary point count	6	1	7	0.3	3.82	3.52	11.7333	11.7333
cryptic	Stationary point count	6	1	7	0.3	2.546	2.246	7.48667	7.48667
cryptic	Stationary point count	6	1	7	0.3	4.138	3.838	12.7933	12.7933
cryptic	Stationary point count	6	1	7	0.3	3.501	3.201	10.67	10.67
cryptic	Stationary point count	6	1	7	0.3	5.73	5.43	18.1	18.1
cryptic	Stationary point count	6	1	7	0.3	1.91	1.61	5.36667	5.36667
cryptic	Stationary point count	6	1	7	0.3	3.501	3.201	10.67	10.67
cryptic	Stationary point count	6	1	9	0.3	0.318	0.018	0.06	0.06
cryptic	Stationary point count	6	1	9	0.3	4.456	4.156	13.8533	13.8533
cryptic	Stationary point count	6	1	9	0.3	3.183	2.883	9.61	9.61
cryptic	Stationary point count	6	1	9	0.3	0.318	0.018	0.06	0.06
cryptic	Stationary point count	6	1	9	0.3	2.546	2.246	7.48667	7.48667
cryptic	Stationary point count	6	1	9	0.3	0	-0.3	-1	1
cryptic	Stationary point count	6	1	9	0.3	2.865	2.565	8.55	8.55
cryptic	Stationary point count	6	1	9	0.3	1.273	0.973	3.24333	3.24333
cryptic	Stationary point count	6	1	9	0.3	0.318	0.018	0.06	0.06
cryptic	Stationary point count	6	1	9	0.3	8.913	8.613	28.71	28.71
cryptic	Stationary point count	6	1	11	0.3	2.228	1.928	6.42667	6.42667
cryptic	Stationary point count	6	1	11	0.3	1.273	0.973	3.24333	3.24333
cryptic	Stationary point count	6	1	11	0.3	1.592	1.292	4.30667	4.30667
cryptic	Stationary point count	6	1	11	0.3	3.183	2.883	9.61	9.61
cryptic	Stationary point count	6	1	11	0.3	3.183	2.883	9.61	9.61
cryptic	Stationary point count	6	1	11	0.3	14.324	14.024	46.7467	46.7467
cryptic	Stationary point count	6	1	11	0.3	3.501	3.201	10.67	10.67
cryptic	Stationary point count	6	1	11	0.3	0.318	0.018	0.06	0.06
cryptic	Stationary point count	6	1	11	0.3	2.865	2.565	8.55	8.55
cryptic	Stationary point count	6	1	11	0.3	3.183	2.883	9.61	9.61
cryptic	Stationary point count	6	2	3	0.3	0.557	0.257	0.856667	0.856667
cryptic	Stationary point count	6	2	3	0.3	0.637	0.337	1.12333	1.12333
cryptic	Stationary point count	6	2	3	0.3	0	-0.3	-1	1
cryptic	Stationary point count	6	2	3	0.3	0.398	0.098	0.326667	0.326667
cryptic	Stationary point count	6	2	3	0.3	0.159	-0.141	-0.47	0.47
cryptic	Stationary point count	6	2	3	0.3	0.239	-0.061	-0.203333	0.203333
cryptic	Stationary point count	6	2	3	0.3	0.318	0.018	0.06	0.06
cryptic	Stationary point count	6	2	3	0.3	0.239	-0.061	-0.203333	0.203333
cryptic	Stationary point count	6	2	3	0.3	0.239	-0.061	-0.203333	0.203333
cryptic	Stationary point count	6	2	3	0.3	0.08	-0.22	-0.733333	0.733333
cryptic	Stationary point count	6	2	5	0.3	0.318	0.018	0.06	0.06
cryptic	Stationary point count	6	2	5	0.3	0.398	0.098	0.326667	0.326667
cryptic	Stationary point count	6	2	5	0.3	0.239	-0.061	-0.203333	0.203333
cryptic	Stationary point count	6	2	5	0.3	0.477	0.177	0.59	0.59
cryptic	Stationary point count	6	2	5	0.3	0.398	0.098	0.326667	0.326667
cryptic	Stationary point count	6	2	5	0.3	0.637	0.337	1.12333	1.12333
cryptic	Stationary point count	6	2	5	0.3	0.637	0.337	1.12333	1.12333
cryptic	Stationary point count	6	2	5	0.3	1.035	0.735	2.45	2.45
cryptic	Stationary point count	6	2	5	0.3	0	-0.3	-1	1
cryptic	Stationary point count	6	2	5	0.3	0	-0.3	-1	1
cryptic	Stationary point count	6	2	7	0.3	0.557	0.257	0.856667	0.856667
cryptic	Stationary point count	6	2	7	0.3	1.273	0.973	3.24333	3.24333
cryptic	Stationary point count	6	2	7	0.3	0.637	0.337	1.12333	1.12333
cryptic	Stationary point count	6	2	7	0.3	1.194	0.894	2.98	2.98
cryptic	Stationary point count	6	2	7	0.3	0.557	0.257	0.856667	0.856667
cryptic	Stationary point count	6	2	7	0.3	0.239	-0.061	-0.203333	0.203333
cryptic	Stationary point count	6	2	7	0.3	0.875	0.575	1.91667	1.91667
cryptic	Stationary point count	6	2	7	0.3	0.796	0.496	1.65333	1.65333
cryptic	Stationary point count	6	2	7	0.3	1.035	0.735	2.45	2.45
cryptic	Stationary point count	6	2	7	0.3	1.194	0.894	2.98	2.98
cryptic	Stationary point count	6	2	9	0.3	0.477	0.177	0.59	0.59
cryptic	Stationary point count	6	2	9	0.3	0.477	0.177	0.59	0.59
cryptic	Stationary point count	6	2	9	0.3	0.318	0.018	0.06	0.06
cryptic	Stationary point count	6	2	9	0.3	1.194	0.894	2.98	2.98
cryptic	Stationary point count	6	2	9	0.3	0.159	-0.141	-0.47	0.47
cryptic	Stationary point count	6	2	9	0.3	0.557	0.257	0.856667	0.856667
cryptic	Stationary point count	6	2	9	0.3	0.875	0.575	1.91667	1.91667
cryptic	Stationary point count	6	2	9	0.3	0.716	0.416	1.38667	1.38667
cryptic	Stationary point count	6	2	9	0.3	2.308	2.008	6.69333	6.69333
cryptic	Stationary point count	6	2	9	0.3	0.08	-0.22	-0.733333	0.733333
cryptic	Stationary point count	6	2	11	0.3	0.477	0.177	0.59	0.59
cryptic	Stationary point count	6	2	11	0.3	0.716	0.416	1.38667	1.38667
cryptic	Stationary point count	6	2	11	0.3	1.353	1.053	3.51	3.51
cryptic	Stationary point count	6	2	11	0.3	1.353	1.053	3.51	3.51
cryptic	Stationary point count	6	2	11	0.3	0.637	0.337	1.12333	1.12333
cryptic	Stationary point count	6	2	11	0.3	1.671	1.371	4.57	4.57
cryptic	Stationary point count	6	2	11	0.3	1.512	1.212	4.04	4.04
cryptic	Stationary point count	6	2	11	0.3	2.069	1.769	5.89667	5.89667
cryptic	Stationary point count	6	2	11	0.3	0.637	0.337	1.12333	1.12333
cryptic	Stationary point count	6	2	11	0.3	0.875	0.575	1.91667	1.91667
cryptic	Stationary point count	6	3	3	0.3	0.141	-0.159	-0.53	0.53
cryptic	Stationary point count	6	3	3	0.3	0.035	-0.265	-0.883333	0.883333
cryptic	Stationary point count	6	3	3	0.3	0	-0.3	-1	1
cryptic	Stationary point count	6	3	3	0.3	0	-0.3	-1	1
cryptic	Stationary point count	6	3	3	0.3	0.177	-0.123	-0.41	0.41
cryptic	Stationary point count	6	3	3	0.3	0.389	0.089	0.296667	0.296667
cryptic	Stationary point count	6	3	3	0.3	0.106	-0.194	-0.646667	0.646667
cryptic	Stationary point count	6	3	3	0.3	0.141	-0.159	-0.53	0.53
cryptic	Stationary point count	6	3	3	0.3	0.035	-0.265	-0.883333	0.883333
cryptic	Stationary point count	6	3	3	0.3	0.035	-0.265	-0.883333	0.883333
cryptic	Stationary point count	6	3	5	0.3	0.389	0.089	0.296667	0.296667
cryptic	Stationary point count	6	3	5	0.3	0.141	-0.159	-0.53	0.53
cryptic	Stationary point count	6	3	5	0.3	0.141	-0.159	-0.53	0.53
cryptic	Stationary point count	6	3	5	0.3	0.035	-0.265	-0.883333	0.883333
cryptic	Stationary point count	6	3	5	0.3	0.071	-0.229	-0.763333	0.763333
cryptic	Stationary point count	6	3	5	0.3	0.354	0.054	0.18	0.18
cryptic	Stationary point count	6	3	5	0.3	0	-0.3	-1	1
cryptic	Stationary point count	6	3	5	0.3	0.106	-0.194	-0.646667	0.646667
cryptic	Stationary point count	6	3	5	0.3	0.177	-0.123	-0.41	0.41
cryptic	Stationary point count	6	3	5	0.3	0.071	-0.229	-0.763333	0.763333
cryptic	Stationary point count	6	3	7	0.3	0.212	-0.088	-0.293333	0.293333
cryptic	Stationary point count	6	3	7	0.3	0.424	0.124	0.413333	0.413333
cryptic	Stationary point count	6	3	7	0.3	0.637	0.337	1.12333	1.12333
cryptic	Stationary point count	6	3	7	0.3	0.283	-0.017	-0.0566667	0.0566667
cryptic	Stationary point count	6	3	7	0.3	0.46	0.16	0.533333	0.533333
cryptic	Stationary point count	6	3	7	0.3	0.354	0.054	0.18	0.18
cryptic	Stationary point count	6	3	7	0.3	0.106	-0.194	-0.646667	0.646667
cryptic	Stationary point count	6	3	7	0.3	0.318	0.018	0.06	0.06
cryptic	Stationary point count	6	3	7	0.3	0.177	-0.123	-0.41	0.41
cryptic	Stationary point count	6	3	7	0.3	0.46	0.16	0.533333	0.533333
cryptic	Stationary point count	6	3	9	0.3	0.637	0.337	1.12333	1.12333
cryptic	Stationary point count	6	3	9	0.3	0.531	0.231	0.77	0.77
cryptic	Stationary point count	6	3	9	0.3	0.212	-0.088	-0.293333	0.293333
cryptic	Stationary point count	6	3	9	0.3	0.424	0.124	0.413333	0.413333
cryptic	Stationary point count	6	3	9	0.3	0.354	0.054	0.18	0.18
cryptic	Stationary point count	6	3	9	0.3	0.071	-0.229	-0.763333	0.763333
cryptic	Stationary point count	6	3	9	0.3	0.106	-0.194	-0.646667	0.646667
cryptic	Stationary point count	6	3	9	0.3	0.283	-0.017	-0.0566667	0.0566667
cryptic	Stationary point count	6	3	9	0.3	0.071	-0.229	-0.763333	0.763333
cryptic	Stationary point count	6	3	9	0.3	0.212	-0.088	-0.293333	0.293333
cryptic	Stationary point count	6	3	11	0.3	0.531	0.231	0.77	0.77
cryptic	Stationary point count	6	3	11	0.3	0.071	-0.229	-0.763333	0.763333
cryptic	Stationary point count	6	3	11	0.3	0.955	0.655	2.18333	2.18333
cryptic	Stationary point count	6	3	11	0.3	0.141	-0.159	-0.53	0.53
cryptic	Stationary point count	6	3	11	0.3	0.566	0.266	0.886667	0.886667
cryptic	Stationary point count	6	3	11	0.3	0.601	0.301	1.00333	1.00333
cryptic	Stationary point count	6	3	11	0.3	0.318	0.018	0.06	0.06
cryptic	Stationary point count	6	3	11	0.3	0.283	-0.017	-0.0566667	0.0566667
cryptic	Stationary point count	6	3	11	0.3	0.495	0.195	0.65	0.65
cryptic	Stationary point count	6	3	11	0.3	0.531	0.231	0.77	0.77
cryptic	Stationary point count	6	4	3	0.3	0.06	-0.24	-0.8	0.8
cryptic	Stationary point count	6	4	3	0.3	0.06	-0.24	-0.8	0.8
cryptic	Stationary point count	6	4	3	0.3	0.04	-0.26	-0.866667	0.866667
cryptic	Stationary point count	6	4	3	0.3	0.159	-0.141	-0.47	0.47
cryptic	Stationary point count	6	4	3	0.3	0.08	-0.22	-0.733333	0.733333
cryptic	Stationary point count	6	4	3	0.3	0.08	-0.22	-0.733333	0.733333
cryptic	Stationary point count	6	4	3	0.3	0.119	-0.181	-0.603333	0.603333
cryptic	Stationary point count	6	4	3	0.3	0.119	-0.181	-0.603333	0.603333
cryptic	Stationary point count	6	4	3	0.3	0.119	-0.181	-0.603333	0.603333
cryptic	Stationary point count	6	4	3	0.3	0.06	-0.24	-0.8	0.8
cryptic	Stationary point count	6	4	5	0.3	0.139	-0.161	-0.536667	0.536667
cryptic	Stationary point count	6	4	5	0.3	0.06	-0.24	-0.8	0.8
cryptic	Stationary point count	6	4	5	0.3	0.179	-0.121	-0.403333	0.403333
cryptic	Stationary point count	6	4	5	0.3	0.08	-0.22	-0.733333	0.733333
cryptic	Stationary point count	6	4	5	0.3	0.179	-0.121	-0.403333	0.403333
cryptic	Stationary point count	6	4	5	0.3	0.119	-0.181	-0.603333	0.603333
cryptic	Stationary point count	6	4	5	0.3	0.199	-0.101	-0.336667	0.336667
cryptic	Stationary point count	6	4	5	0.3	0.099	-0.201	-0.67	0.67
cryptic	Stationary point count	6	4	5	0.3	0.04	-0.26	-0.866667	0.866667
cryptic	Stationary point count	6	4	5	0.3	0.159	-0.141	-0.47	0.47
cryptic	Stationary point count	6	4	7	0.3	0.279	-0.021	-0.07	0.07
cryptic	Stationary point count	6	4	7	0.3	0.06	-0.24	-0.8	0.8
cryptic	Stationary point count	6	4	7	0.3	0.219	-0.081	-0.27	0.27
cryptic	Stationary point count	6	4	7	0.3	0.02	-0.28	-0.933333	0.933333
cryptic	Stationary point count	6	4	7	0.3	0.08	-0.22	-0.733333	0.733333
cryptic	Stationary point count	6	4	7	0.3	0.159	-0.141	-0.47	0.47
cryptic	Stationary point count	6	4	7	0.3	0.06	-0.24	-0.8	0.8
cryptic	Stationary point count	6	4	7	0.3	0.06	-0.24	-0.8	0.8
cryptic	Stationary point count	6	4	7	0.3	0.219	-0.081	-0.27	0.27
cryptic	Stationary point count	6	4	7	0.3	0.259	-0.041	-0.136667	0.136667
cryptic	Stationary point count	6	4	9	0.3	0.06	-0.24	-0.8	0.8
cryptic	Stationary point count	6	4	9	0.3	0.06	-0.24	-0.8	0.8
cryptic	Stationary point count	6	4	9	0.3	0.06	-0.24	-0.8	0.8
cryptic	Stationary point count	6	4	9	0.3	0.06	-0.24	-0.8	0.8
cryptic	Stationary point count	6	4	9	0.3	0.06	-0.24	-0.8	0.8
cryptic	Stationary point count	6	4	9	0.3	0.08	-0.22	-0.733333	0.733333
cryptic	Stationary point count	6	4	9	0.3	0.02	-0.28	-0.933333	0.933333
cryptic	Stationary point count	6	4	9	0.3	0.06	-0.24	-0.8	0.8
cryptic	Stationary point count	6	4	9	0.3	0.259	-0.041	-0.136667	0.136667
cryptic	Stationary point count	6	4	9	0.3	0.04	-0.26	-0.866667	0.866667
cryptic	Stationary point count	6	4	11	0.3	0.179	-0.121	-0.403333	0.403333
cryptic	Stationary point count	6	4	11	0.3	0.199	-0.101	-0.336667	0.336667
cryptic	Stationary point count	6	4	11	0.3	0.378	0.078	0.26	0.26
cryptic	Stationary point count	6	4	11	0.3	0.139	-0.161	-0.536667	0.536667
cryptic	Stationary point count	6	4	11	0.3	0.179	-0.121	-0.403333	0.403333
cryptic	Stationary point count	6	4	11	0.3	0.239	-0.061	-0.203333	0.203333
cryptic	Stationary point count	6	4	11	0.3	0.179	-0.121	-0.403333	0.403333
cryptic	Stationary point count	6	4	11	0.3	0.338	0.038	0.126667	0.126667
cryptic	Stationary point count	6	4	11	0.3	0.119	-0.181	-0.603333	0.603333
cryptic	Stationary point count	6	4	11	0.3	0.338	0.038	0.126667	0.126667
cryptic	Stationary point count	6	5	3	0.3	0.025	-0.275	-0.916667	0.916667
cryptic	Stationary point count	6	5	3	0.3	0.013	-0.287	-0.956667	0.956667
cryptic	Stationary point count	6	5	3	0.3	0.038	-0.262	-0.873333	0.873333
cryptic	Stationary point count	6	5	3	0.3	0.051	-0.249	-0.83	0.83
cryptic	Stationary point count	6	5	3	0.3	0.013	-0.287	-0.956667	0.956667
cryptic	Stationary point count	6	5	3	0.3	0.14	-0.16	-0.533333	0.533333
cryptic	Stationary point count	6	5	3	0.3	0.013	-0.287	-0.956667	0.956667
cryptic	Stationary point count	6	5	3	0.3	0	-0.3	-1	1
cryptic	Stationary point count	6	5	3	0.3	0.089	-0.211	-0.703333	0.703333
cryptic	Stationary point count	6	5	3	0.3	0.153	-0.147	-0.49	0.49
cryptic	Stationary point count	6	5	5	0.3	0.089	-0.211	-0.703333	0.703333
cryptic	Stationary point count	6	5	5	0.3	0.064	-0.236	-0.786667	0.786667
cryptic	Stationary point count	6	5	5	0.3	0.166	-0.134	-0.446667	0.446667
cryptic	Stationary point count	6	5	5	0.3	0.025	-0.275	-0.916667	0.916667
cryptic	Stationary point count	6	5	5	0.3	0.115	-0.185	-0.616667	0.616667
cryptic	Stationary point count	6	5	5	0.3	0.076	-0.224	-0.746667	0.746667
cryptic	Stationary point count	6	5	5	0.3	0.089	-0.211	-0.703333	0.703333
cryptic	Stationary point count	6	5	5	0.3	0.013	-0.287	-0.956667	0.956667
cryptic	Stationary point count	6	5	5	0.3	0.051	-0.249	-0.83	0.83
cryptic	Stationary point count	6	5	5	0.3	0.229	-0.071	-0.236667	0.236667
cryptic	Stationary point count	6	5	7	0.3	0.013	-0.287	-0.956667	0.956667
cryptic	Stationary point count	6	5	7	0.3	0.038	-0.262	-0.873333	0.873333
cryptic	Stationary point count	6	5	7	0.3	0.166	-0.134	-0.446667	0.446667
cryptic	Stationary point count	6	5	7	0.3	0.115	-0.185	-0.616667	0.616667
cryptic	Stationary point count	6	5	7	0.3	0.127	-0.173	-0.576667	0.576667
cryptic	Stationary point count	6	5	7	0.3	0.076	-0.224	-0.746667	0.746667
cryptic	Stationary point count	6	5	7	0.3	0.178	-0.122	-0.406667	0.406667
cryptic	Stationary point count	6	5	7	0.3	0.089	-0.211	-0.703333	0.703333
cryptic	Stationary point count	6	5	7	0.3	0.14	-0.16	-0.533333	0.533333
cryptic	Stationary point count	6	5	7	0.3	0.166	-0.134	-0.446667	0.446667
cryptic	Stationary point count	6	5	9	0.3	0.127	-0.173	-0.576667	0.576667
cryptic	Stationary point count	6	5	9	0.3	0.089	-0.211	-0.703333	0.703333
cryptic	Stationary point count	6	5	9	0.3	0.318	0.018	0.06	0.06
cryptic	Stationary point count	6	5	9	0.3	0.102	-0.198	-0.66	0.66
cryptic	Stationary point count	6	5	9	0.3	0.229	-0.071	-0.236667	0.236667
cryptic	Stationary point count	6	5	9	0.3	0.166	-0.134	-0.446667	0.446667
cryptic	Stationary point count	6	5	9	0.3	0.153	-0.147	-0.49	0.49
cryptic	Stationary point count	6	5	9	0.3	0.153	-0.147	-0.49	0.49
cryptic	Stationary point count	6	5	9	0.3	0.14	-0.16	-0.533333	0.533333
cryptic	Stationary point count	6	5	9	0.3	0.025	-0.275	-0.916667	0.916667
cryptic	Stationary point count	6	5	11	0.3	0.102	-0.198	-0.66	0.66
cryptic	Stationary point count	6	5	11	0.3	0.051	-0.249	-0.83	0.83
cryptic	Stationary point count	6	5	11	0.3	0.115	-0.185	-0.616667	0.616667
cryptic	Stationary point count	6	5	11	0.3	0.255	-0.045	-0.15	0.15
cryptic	Stationary point count	6	5	11	0.3	0.166	-0.134	-0.446667	0.446667
cryptic	Stationary point count	6	5	11	0.3	0.025	-0.275	-0.916667	0.916667
cryptic	Stationary point count	6	5	11	0.3	0.115	-0.185	-0.616667	0.616667
cryptic	Stationary point count	6	5	11	0.3	0.025	-0.275	-0.916667	0.916667
cryptic	Stationary point count	6	5	11	0.3	0.255	-0.045	-0.15	0.15
[truncated: 3,001 more rows]

## Sheet: transect
behavior	method	distance (m)	width (m)	speed (m/min)	real.density	estimated.density	difference	bias	abs.bias
schooling	Fixed distance transect	10	1	2	0.3	3.4	3.1	10.3333	10.3333
schooling	Fixed distance transect	10	1	2	0.3	4	3.7	12.3333	12.3333
schooling	Fixed distance transect	10	1	2	0.3	1.9	1.6	5.33333	5.33333
schooling	Fixed distance transect	10	1	2	0.3	1.7	1.4	4.66667	4.66667
schooling	Fixed distance transect	10	1	2	0.3	3.4	3.1	10.3333	10.3333
schooling	Fixed distance transect	10	1	2	0.3	2.8	2.5	8.33333	8.33333
schooling	Fixed distance transect	10	1	2	0.3	2.6	2.3	7.66667	7.66667
schooling	Fixed distance transect	10	1	2	0.3	2.2	1.9	6.33333	6.33333
schooling	Fixed distance transect	10	1	2	0.3	2.7	2.4	8	8
schooling	Fixed distance transect	10	1	2	0.3	2.5	2.2	7.33333	7.33333
schooling	Fixed distance transect	10	1	4	0.3	2	1.7	5.66667	5.66667
schooling	Fixed distance transect	10	1	4	0.3	0.5	0.2	0.666667	0.666667
schooling	Fixed distance transect	10	1	4	0.3	1.7	1.4	4.66667	4.66667
schooling	Fixed distance transect	10	1	4	0.3	0.7	0.4	1.33333	1.33333
schooling	Fixed distance transect	10	1	4	0.3	0.6	0.3	1	1
schooling	Fixed distance transect	10	1	4	0.3	1.8	1.5	5	5
schooling	Fixed distance transect	10	1	4	0.3	1.6	1.3	4.33333	4.33333
schooling	Fixed distance transect	10	1	4	0.3	1	0.7	2.33333	2.33333
schooling	Fixed distance transect	10	1	4	0.3	2.5	2.2	7.33333	7.33333
schooling	Fixed distance transect	10	1	4	0.3	1.4	1.1	3.66667	3.66667
schooling	Fixed distance transect	10	1	6	0.3	2.5	2.2	7.33333	7.33333
schooling	Fixed distance transect	10	1	6	0.3	1.1	0.8	2.66667	2.66667
schooling	Fixed distance transect	10	1	6	0.3	0.4	0.1	0.333333	0.333333
schooling	Fixed distance transect	10	1	6	0.3	1.3	1	3.33333	3.33333
schooling	Fixed distance transect	10	1	6	0.3	0.6	0.3	1	1
schooling	Fixed distance transect	10	1	6	0.3	1.6	1.3	4.33333	4.33333
schooling	Fixed distance transect	10	1	6	0.3	0.6	0.3	1	1
schooling	Fixed distance transect	10	1	6	0.3	0.3	0	0	0
schooling	Fixed distance transect	10	1	6	0.3	0	-0.3	-1	1
schooling	Fixed distance transect	10	1	6	0.3	1	0.7	2.33333	2.33333
schooling	Fixed distance transect	10	1	8	0.3	0.3	0	0	0
schooling	Fixed distance transect	10	1	8	0.3	0.8	0.5	1.66667	1.66667
schooling	Fixed distance transect	10	1	8	0.3	0.5	0.2	0.666667	0.666667
schooling	Fixed distance transect	10	1	8	0.3	0.8	0.5	1.66667	1.66667
schooling	Fixed distance transect	10	1	8	0.3	0.6	0.3	1	1
schooling	Fixed distance transect	10	1	8	0.3	1.2	0.9	3	3
schooling	Fixed distance transect	10	1	8	0.3	0.6	0.3	1	1
schooling	Fixed distance transect	10	1	8	0.3	2	1.7	5.66667	5.66667
schooling	Fixed distance transect	10	1	8	0.3	1.1	0.8	2.66667	2.66667
schooling	Fixed distance transect	10	1	8	0.3	0.9	0.6	2	2
schooling	Fixed distance transect	10	1	10	0.3	0.9	0.6	2	2
schooling	Fixed distance transect	10	1	10	0.3	0.8	0.5	1.66667	1.66667
schooling	Fixed distance transect	10	1	10	0.3	0.6	0.3	1	1
schooling	Fixed distance transect	10	1	10	0.3	0.4	0.1	0.333333	0.333333
schooling	Fixed distance transect	10	1	10	0.3	1.1	0.8	2.66667	2.66667
schooling	Fixed distance transect	10	1	10	0.3	1.2	0.9	3	3
schooling	Fixed distance transect	10	1	10	0.3	0.5	0.2	0.666667	0.666667
schooling	Fixed distance transect	10	1	10	0.3	0.2	-0.1	-0.333333	0.333333
schooling	Fixed distance transect	10	1	10	0.3	1.2	0.9	3	3
schooling	Fixed distance transect	10	1	10	0.3	0.9	0.6	2	2
schooling	Fixed distance transect	10	2	2	0.3	1.3	1	3.33333	3.33333
schooling	Fixed distance transect	10	2	2	0.3	1.3	1	3.33333	3.33333
schooling	Fixed distance transect	10	2	2	0.3	1.05	0.75	2.5	2.5
schooling	Fixed distance transect	10	2	2	0.3	1.9	1.6	5.33333	5.33333
schooling	Fixed distance transect	10	2	2	0.3	1.1	0.8	2.66667	2.66667
schooling	Fixed distance transect	10	2	2	0.3	2	1.7	5.66667	5.66667
schooling	Fixed distance transect	10	2	2	0.3	1.6	1.3	4.33333	4.33333
schooling	Fixed distance transect	10	2	2	0.3	2.5	2.2	7.33333	7.33333
schooling	Fixed distance transect	10	2	2	0.3	1.45	1.15	3.83333	3.83333
schooling	Fixed distance transect	10	2	2	0.3	1.1	0.8	2.66667	2.66667
schooling	Fixed distance transect	10	2	4	0.3	1.15	0.85	2.83333	2.83333
schooling	Fixed distance transect	10	2	4	0.3	0.8	0.5	1.66667	1.66667
schooling	Fixed distance transect	10	2	4	0.3	0.95	0.65	2.16667	2.16667
schooling	Fixed distance transect	10	2	4	0.3	0.95	0.65	2.16667	2.16667
schooling	Fixed distance transect	10	2	4	0.3	0.8	0.5	1.66667	1.66667
schooling	Fixed distance transect	10	2	4	0.3	0.65	0.35	1.16667	1.16667
schooling	Fixed distance transect	10	2	4	0.3	1	0.7	2.33333	2.33333
schooling	Fixed distance transect	10	2	4	0.3	0.85	0.55	1.83333	1.83333
schooling	Fixed distance transect	10	2	4	0.3	1.25	0.95	3.16667	3.16667
schooling	Fixed distance transect	10	2	4	0.3	0.85	0.55	1.83333	1.83333
schooling	Fixed distance transect	10	2	6	0.3	0.75	0.45	1.5	1.5
schooling	Fixed distance transect	10	2	6	0.3	0.9	0.6	2	2
schooling	Fixed distance transect	10	2	6	0.3	0.65	0.35	1.16667	1.16667
schooling	Fixed distance transect	10	2	6	0.3	0.95	0.65	2.16667	2.16667
schooling	Fixed distance transect	10	2	6	0.3	0.5	0.2	0.666667	0.666667
schooling	Fixed distance transect	10	2	6	0.3	1	0.7	2.33333	2.33333
schooling	Fixed distance transect	10	2	6	0.3	0.85	0.55	1.83333	1.83333
schooling	Fixed distance transect	10	2	6	0.3	0.6	0.3	1	1
schooling	Fixed distance transect	10	2	6	0.3	0.75	0.45	1.5	1.5
schooling	Fixed distance transect	10	2	6	0.3	0.7	0.4	1.33333	1.33333
schooling	Fixed distance transect	10	2	8	0.3	0.7	0.4	1.33333	1.33333
schooling	Fixed distance transect	10	2	8	0.3	0.9	0.6	2	2
schooling	Fixed distance transect	10	2	8	0.3	1.2	0.9	3	3
schooling	Fixed distance transect	10	2	8	0.3	0.45	0.15	0.5	0.5
schooling	Fixed distance transect	10	2	8	0.3	0.4	0.1	0.333333	0.333333
schooling	Fixed distance transect	10	2	8	0.3	1.05	0.75	2.5	2.5
schooling	Fixed distance transect	10	2	8	0.3	0.75	0.45	1.5	1.5
schooling	Fixed distance transect	10	2	8	0.3	0.65	0.35	1.16667	1.16667
schooling	Fixed distance transect	10	2	8	0.3	0.4	0.1	0.333333	0.333333
schooling	Fixed distance transect	10	2	8	0.3	0.6	0.3	1	1
schooling	Fixed distance transect	10	2	10	0.3	0.45	0.15	0.5	0.5
schooling	Fixed distance transect	10	2	10	0.3	0.5	0.2	0.666667	0.666667
schooling	Fixed distance transect	10	2	10	0.3	0.35	0.05	0.166667	0.166667
schooling	Fixed distance transect	10	2	10	0.3	0.25	-0.05	-0.166667	0.166667
schooling	Fixed distance transect	10	2	10	0.3	0.5	0.2	0.666667	0.666667
schooling	Fixed distance transect	10	2	10	0.3	0.55	0.25	0.833333	0.833333
schooling	Fixed distance transect	10	2	10	0.3	0.55	0.25	0.833333	0.833333
schooling	Fixed distance transect	10	2	10	0.3	0.95	0.65	2.16667	2.16667
schooling	Fixed distance transect	10	2	10	0.3	0.55	0.25	0.833333	0.833333
schooling	Fixed distance transect	10	2	10	0.3	0.85	0.55	1.83333	1.83333
schooling	Fixed distance transect	10	3	2	0.3	1.133	0.833	2.77667	2.77667
schooling	Fixed distance transect	10	3	2	0.3	1.2	0.9	3	3
schooling	Fixed distance transect	10	3	2	0.3	1.633	1.333	4.44333	4.44333
schooling	Fixed distance transect	10	3	2	0.3	1.267	0.967	3.22333	3.22333
schooling	Fixed distance transect	10	3	2	0.3	2.2	1.9	6.33333	6.33333
schooling	Fixed distance transect	10	3	2	0.3	1.7	1.4	4.66667	4.66667
schooling	Fixed distance transect	10	3	2	0.3	0.7	0.4	1.33333	1.33333
schooling	Fixed distance transect	10	3	2	0.3	0.767	0.467	1.55667	1.55667
schooling	Fixed distance transect	10	3	2	0.3	1.633	1.333	4.44333	4.44333
schooling	Fixed distance transect	10	3	2	0.3	1.767	1.467	4.89	4.89
schooling	Fixed distance transect	10	3	4	0.3	0.633	0.333	1.11	1.11
schooling	Fixed distance transect	10	3	4	0.3	1.267	0.967	3.22333	3.22333
schooling	Fixed distance transect	10	3	4	0.3	1.1	0.8	2.66667	2.66667
schooling	Fixed distance transect	10	3	4	0.3	0.767	0.467	1.55667	1.55667
schooling	Fixed distance transect	10	3	4	0.3	0.667	0.367	1.22333	1.22333
schooling	Fixed distance transect	10	3	4	0.3	0.867	0.567	1.89	1.89
schooling	Fixed distance transect	10	3	4	0.3	0.933	0.633	2.11	2.11
schooling	Fixed distance transect	10	3	4	0.3	0.8	0.5	1.66667	1.66667
schooling	Fixed distance transect	10	3	4	0.3	0.967	0.667	2.22333	2.22333
schooling	Fixed distance transect	10	3	4	0.3	1.167	0.867	2.89	2.89
schooling	Fixed distance transect	10	3	6	0.3	1.233	0.933	3.11	3.11
schooling	Fixed distance transect	10	3	6	0.3	0.367	0.067	0.223333	0.223333
schooling	Fixed distance transect	10	3	6	0.3	0.833	0.533	1.77667	1.77667
schooling	Fixed distance transect	10	3	6	0.3	0.633	0.333	1.11	1.11
schooling	Fixed distance transect	10	3	6	0.3	0.3	0	0	0
schooling	Fixed distance transect	10	3	6	0.3	0.6	0.3	1	1
schooling	Fixed distance transect	10	3	6	0.3	1.167	0.867	2.89	2.89
schooling	Fixed distance transect	10	3	6	0.3	0.5	0.2	0.666667	0.666667
schooling	Fixed distance transect	10	3	6	0.3	0.633	0.333	1.11	1.11
schooling	Fixed distance transect	10	3	6	0.3	0.633	0.333	1.11	1.11
schooling	Fixed distance transect	10	3	8	0.3	0.733	0.433	1.44333	1.44333
schooling	Fixed distance transect	10	3	8	0.3	0.467	0.167	0.556667	0.556667
schooling	Fixed distance transect	10	3	8	0.3	0.433	0.133	0.443333	0.443333
schooling	Fixed distance transect	10	3	8	0.3	0.533	0.233	0.776667	0.776667
schooling	Fixed distance transect	10	3	8	0.3	0.733	0.433	1.44333	1.44333
schooling	Fixed distance transect	10	3	8	0.3	0.667	0.367	1.22333	1.22333
schooling	Fixed distance transect	10	3	8	0.3	0.5	0.2	0.666667	0.666667
schooling	Fixed distance transect	10	3	8	0.3	0.7	0.4	1.33333	1.33333
schooling	Fixed distance transect	10	3	8	0.3	0.667	0.367	1.22333	1.22333
schooling	Fixed distance transect	10	3	8	0.3	0.5	0.2	0.666667	0.666667
schooling	Fixed distance transect	10	3	10	0.3	0.5	0.2	0.666667	0.666667
schooling	Fixed distance transect	10	3	10	0.3	0.867	0.567	1.89	1.89
schooling	Fixed distance transect	10	3	10	0.3	0.4	0.1	0.333333	0.333333
schooling	Fixed distance transect	10	3	10	0.3	0.633	0.333	1.11	1.11
schooling	Fixed distance transect	10	3	10	0.3	0.967	0.667	2.22333	2.22333
schooling	Fixed distance transect	10	3	10	0.3	0.567	0.267	0.89	0.89
schooling	Fixed distance transect	10	3	10	0.3	0.433	0.133	0.443333	0.443333
schooling	Fixed distance transect	10	3	10	0.3	0.667	0.367	1.22333	1.22333
schooling	Fixed distance transect	10	3	10	0.3	0.567	0.267	0.89	0.89
schooling	Fixed distance transect	10	3	10	0.3	0.2	-0.1	-0.333333	0.333333
schooling	Fixed distance transect	10	4	2	0.3	1.225	0.925	3.08333	3.08333
schooling	Fixed distance transect	10	4	2	0.3	1.65	1.35	4.5	4.5
schooling	Fixed distance transect	10	4	2	0.3	1.3	1	3.33333	3.33333
schooling	Fixed distance transect	10	4	2	0.3	1.175	0.875	2.91667	2.91667
schooling	Fixed distance transect	10	4	2	0.3	1.85	1.55	5.16667	5.16667
schooling	Fixed distance transect	10	4	2	0.3	2.05	1.75	5.83333	5.83333
schooling	Fixed distance transect	10	4	2	0.3	0.8	0.5	1.66667	1.66667
schooling	Fixed distance transect	10	4	2	0.3	0.925	0.625	2.08333	2.08333
schooling	Fixed distance transect	10	4	2	0.3	1.525	1.225	4.08333	4.08333
schooling	Fixed distance transect	10	4	2	0.3	1.375	1.075	3.58333	3.58333
schooling	Fixed distance transect	10	4	4	0.3	0.7	0.4	1.33333	1.33333
schooling	Fixed distance transect	10	4	4	0.3	1.025	0.725	2.41667	2.41667
schooling	Fixed distance transect	10	4	4	0.3	0.65	0.35	1.16667	1.16667
schooling	Fixed distance transect	10	4	4	0.3	0.575	0.275	0.916667	0.916667
schooling	Fixed distance transect	10	4	4	0.3	0.425	0.125	0.416667	0.416667
schooling	Fixed distance transect	10	4	4	0.3	0.8	0.5	1.66667	1.66667
schooling	Fixed distance transect	10	4	4	0.3	0.925	0.625	2.08333	2.08333
schooling	Fixed distance transect	10	4	4	0.3	0.45	0.15	0.5	0.5
schooling	Fixed distance transect	10	4	4	0.3	0.725	0.425	1.41667	1.41667
schooling	Fixed distance transect	10	4	4	0.3	0.4	0.1	0.333333	0.333333
schooling	Fixed distance transect	10	4	6	0.3	0.3	0	0	0
schooling	Fixed distance transect	10	4	6	0.3	0.7	0.4	1.33333	1.33333
schooling	Fixed distance transect	10	4	6	0.3	0.275	-0.025	-0.0833333	0.0833333
schooling	Fixed distance transect	10	4	6	0.3	0.65	0.35	1.16667	1.16667
schooling	Fixed distance transect	10	4	6	0.3	0.55	0.25	0.833333	0.833333
schooling	Fixed distance transect	10	4	6	0.3	0.375	0.075	0.25	0.25
schooling	Fixed distance transect	10	4	6	0.3	0.475	0.175	0.583333	0.583333
schooling	Fixed distance transect	10	4	6	0.3	0.45	0.15	0.5	0.5
schooling	Fixed distance transect	10	4	6	0.3	0.675	0.375	1.25	1.25
schooling	Fixed distance transect	10	4	6	0.3	0.6	0.3	1	1
schooling	Fixed distance transect	10	4	8	0.3	0.325	0.025	0.0833333	0.0833333
schooling	Fixed distance transect	10	4	8	0.3	0.35	0.05	0.166667	0.166667
schooling	Fixed distance transect	10	4	8	0.3	0.55	0.25	0.833333	0.833333
schooling	Fixed distance transect	10	4	8	0.3	0.45	0.15	0.5	0.5
schooling	Fixed distance transect	10	4	8	0.3	0.325	0.025	0.0833333	0.0833333
schooling	Fixed distance transect	10	4	8	0.3	0.575	0.275	0.916667	0.916667
schooling	Fixed distance transect	10	4	8	0.3	0.575	0.275	0.916667	0.916667
schooling	Fixed distance transect	10	4	8	0.3	0.575	0.275	0.916667	0.916667
schooling	Fixed distance transect	10	4	8	0.3	0.425	0.125	0.416667	0.416667
schooling	Fixed distance transect	10	4	8	0.3	0.45	0.15	0.5	0.5
schooling	Fixed distance transect	10	4	10	0.3	0.325	0.025	0.0833333	0.0833333
schooling	Fixed distance transect	10	4	10	0.3	0.425	0.125	0.416667	0.416667
schooling	Fixed distance transect	10	4	10	0.3	0.375	0.075	0.25	0.25
schooling	Fixed distance transect	10	4	10	0.3	0.45	0.15	0.5	0.5
schooling	Fixed distance transect	10	4	10	0.3	0.575	0.275	0.916667	0.916667
schooling	Fixed distance transect	10	4	10	0.3	0.45	0.15	0.5	0.5
schooling	Fixed distance transect	10	4	10	0.3	0.225	-0.075	-0.25	0.25
schooling	Fixed distance transect	10	4	10	0.3	0.45	0.15	0.5	0.5
schooling	Fixed distance transect	10	4	10	0.3	0.55	0.25	0.833333	0.833333
schooling	Fixed distance transect	10	4	10	0.3	0.6	0.3	1	1
schooling	Fixed distance transect	10	5	2	0.3	1.16	0.86	2.86667	2.86667
schooling	Fixed distance transect	10	5	2	0.3	1.04	0.74	2.46667	2.46667
schooling	Fixed distance transect	10	5	2	0.3	1.88	1.58	5.26667	5.26667
schooling	Fixed distance transect	10	5	2	0.3	1.66	1.36	4.53333	4.53333
schooling	Fixed distance transect	10	5	2	0.3	1.44	1.14	3.8	3.8
schooling	Fixed distance transect	10	5	2	0.3	1.04	0.74	2.46667	2.46667
schooling	Fixed distance transect	10	5	2	0.3	1.6	1.3	4.33333	4.33333
schooling	Fixed distance transect	10	5	2	0.3	0.96	0.66	2.2	2.2
schooling	Fixed distance transect	10	5	2	0.3	1.4	1.1	3.66667	3.66667
schooling	Fixed distance transect	10	5	2	0.3	1.44	1.14	3.8	3.8
schooling	Fixed distance transect	10	5	4	0.3	0.88	0.58	1.93333	1.93333
schooling	Fixed distance transect	10	5	4	0.3	0.54	0.24	0.8	0.8
schooling	Fixed distance transect	10	5	4	0.3	0.68	0.38	1.26667	1.26667
schooling	Fixed distance transect	10	5	4	0.3	1.48	1.18	3.93333	3.93333
schooling	Fixed distance transect	10	5	4	0.3	0.46	0.16	0.533333	0.533333
schooling	Fixed distance transect	10	5	4	0.3	0.58	0.28	0.933333	0.933333
schooling	Fixed distance transect	10	5	4	0.3	0.84	0.54	1.8	1.8
schooling	Fixed distance transect	10	5	4	0.3	0.76	0.46	1.53333	1.53333
schooling	Fixed distance transect	10	5	4	0.3	0.44	0.14	0.466667	0.466667
schooling	Fixed distance transect	10	5	4	0.3	0.88	0.58	1.93333	1.93333
schooling	Fixed distance transect	10	5	6	0.3	0.38	0.08	0.266667	0.266667
schooling	Fixed distance transect	10	5	6	0.3	0.58	0.28	0.933333	0.933333
schooling	Fixed distance transect	10	5	6	0.3	0.58	0.28	0.933333	0.933333
schooling	Fixed distance transect	10	5	6	0.3	0.74	0.44	1.46667	1.46667
schooling	Fixed distance transect	10	5	6	0.3	0.36	0.06	0.2	0.2
schooling	Fixed distance transect	10	5	6	0.3	0.42	0.12	0.4	0.4
schooling	Fixed distance transect	10	5	6	0.3	0.6	0.3	1	1
schooling	Fixed distance transect	10	5	6	0.3	0.54	0.24	0.8	0.8
schooling	Fixed distance transect	10	5	6	0.3	0.64	0.34	1.13333	1.13333
schooling	Fixed distance transect	10	5	6	0.3	0.36	0.06	0.2	0.2
schooling	Fixed distance transect	10	5	8	0.3	0.68	0.38	1.26667	1.26667
schooling	Fixed distance transect	10	5	8	0.3	0.6	0.3	1	1
schooling	Fixed distance transect	10	5	8	0.3	0.36	0.06	0.2	0.2
schooling	Fixed distance transect	10	5	8	0.3	0.46	0.16	0.533333	0.533333
schooling	Fixed distance transect	10	5	8	0.3	0.48	0.18	0.6	0.6
schooling	Fixed distance transect	10	5	8	0.3	0.78	0.48	1.6	1.6
schooling	Fixed distance transect	10	5	8	0.3	0.2	-0.1	-0.333333	0.333333
schooling	Fixed distance transect	10	5	8	0.3	0.24	-0.06	-0.2	0.2
schooling	Fixed distance transect	10	5	8	0.3	0.6	0.3	1	1
schooling	Fixed distance transect	10	5	8	0.3	0.4	0.1	0.333333	0.333333
schooling	Fixed distance transect	10	5	10	0.3	0.4	0.1	0.333333	0.333333
schooling	Fixed distance transect	10	5	10	0.3	0.5	0.2	0.666667	0.666667
schooling	Fixed distance transect	10	5	10	0.3	0.24	-0.06	-0.2	0.2
schooling	Fixed distance transect	10	5	10	0.3	0.34	0.04	0.133333	0.133333
schooling	Fixed distance transect	10	5	10	0.3	0.4	0.1	0.333333	0.333333
schooling	Fixed distance transect	10	5	10	0.3	0.54	0.24	0.8	0.8
schooling	Fixed distance transect	10	5	10	0.3	0.58	0.28	0.933333	0.933333
schooling	Fixed distance transect	10	5	10	0.3	0.32	0.02	0.0666667	0.0666667
schooling	Fixed distance transect	10	5	10	0.3	0.32	0.02	0.0666667	0.0666667
schooling	Fixed distance transect	10	5	10	0.3	0.56	0.26	0.866667	0.866667
schooling	Fixed distance transect	20	1	2	0.3	3.1	2.8	9.33333	9.33333
schooling	Fixed distance transect	20	1	2	0.3	3.15	2.85	9.5	9.5
schooling	Fixed distance transect	20	1	2	0.3	2.95	2.65	8.83333	8.83333
schooling	Fixed distance transect	20	1	2	0.3	3.4	3.1	10.3333	10.3333
schooling	Fixed distance transect	20	1	2	0.3	2.15	1.85	6.16667	6.16667
schooling	Fixed distance transect	20	1	2	0.3	3.3	3	10	10
schooling	Fixed distance transect	20	1	2	0.3	3.05	2.75	9.16667	9.16667
schooling	Fixed distance transect	20	1	2	0.3	2.5	2.2	7.33333	7.33333
schooling	Fixed distance transect	20	1	2	0.3	1.85	1.55	5.16667	5.16667
schooling	Fixed distance transect	20	1	2	0.3	2.05	1.75	5.83333	5.83333
schooling	Fixed distance transect	20	1	4	0.3	1.95	1.65	5.5	5.5
schooling	Fixed distance transect	20	1	4	0.3	1.15	0.85	2.83333	2.83333
schooling	Fixed distance transect	20	1	4	0.3	1.75	1.45	4.83333	4.83333
schooling	Fixed distance transect	20	1	4	0.3	2.05	1.75	5.83333	5.83333
schooling	Fixed distance transect	20	1	4	0.3	1.5	1.2	4	4
schooling	Fixed distance transect	20	1	4	0.3	1.3	1	3.33333	3.33333
schooling	Fixed distance transect	20	1	4	0.3	1.3	1	3.33333	3.33333
schooling	Fixed distance transect	20	1	4	0.3	0.55	0.25	0.833333	0.833333
schooling	Fixed distance transect	20	1	4	0.3	1.95	1.65	5.5	5.5
schooling	Fixed distance transect	20	1	4	0.3	1.4	1.1	3.66667	3.66667
schooling	Fixed distance transect	20	1	6	0.3	0.5	0.2	0.666667	0.666667
schooling	Fixed distance transect	20	1	6	0.3	1.2	0.9	3	3
schooling	Fixed distance transect	20	1	6	0.3	0.85	0.55	1.83333	1.83333
schooling	Fixed distance transect	20	1	6	0.3	1.2	0.9	3	3
schooling	Fixed distance transect	20	1	6	0.3	1.5	1.2	4	4
schooling	Fixed distance transect	20	1	6	0.3	1.65	1.35	4.5	4.5
schooling	Fixed distance transect	20	1	6	0.3	1	0.7	2.33333	2.33333
schooling	Fixed distance transect	20	1	6	0.3	1.95	1.65	5.5	5.5
schooling	Fixed distance transect	20	1	6	0.3	1.55	1.25	4.16667	4.16667
schooling	Fixed distance transect	20	1	6	0.3	1.9	1.6	5.33333	5.33333
schooling	Fixed distance transect	20	1	8	0.3	1.1	0.8	2.66667	2.66667
schooling	Fixed distance transect	20	1	8	0.3	1.15	0.85	2.83333	2.83333
schooling	Fixed distance transect	20	1	8	0.3	0.5	0.2	0.666667	0.666667
schooling	Fixed distance transect	20	1	8	0.3	1.15	0.85	2.83333	2.83333
schooling	Fixed distance transect	20	1	8	0.3	0.6	0.3	1	1
schooling	Fixed distance transect	20	1	8	0.3	0.95	0.65	2.16667	2.16667
schooling	Fixed distance transect	20	1	8	0.3	1.15	0.85	2.83333	2.83333
schooling	Fixed distance transect	20	1	8	0.3	0.6	0.3	1	1
schooling	Fixed distance transect	20	1	8	0.3	0.8	0.5	1.66667	1.66667
schooling	Fixed distance transect	20	1	8	0.3	0.4	0.1	0.333333	0.333333
schooling	Fixed distance transect	20	1	10	0.3	0.5	0.2	0.666667	0.666667
schooling	Fixed distance transect	20	1	10	0.3	0.5	0.2	0.666667	0.666667
schooling	Fixed distance transect	20	1	10	0.3	0.5	0.2	0.666667	0.666667
schooling	Fixed distance transect	20	1	10	0.3	0.75	0.45	1.5	1.5
schooling	Fixed distance transect	20	1	10	0.3	0.5	0.2	0.666667	0.666667
schooling	Fixed distance transect	20	1	10	0.3	0.55	0.25	0.833333	0.833333
schooling	Fixed distance transect	20	1	10	0.3	0.35	0.05	0.166667	0.166667
schooling	Fixed distance transect	20	1	10	0.3	0.55	0.25	0.833333	0.833333
schooling	Fixed distance transect	20	1	10	0.3	0.75	0.45	1.5	1.5
schooling	Fixed distance transect	20	1	10	0.3	0.8	0.5	1.66667	1.66667
schooling	Fixed distance transect	20	2	2	0.3	1.05	0.75	2.5	2.5
schooling	Fixed distance transect	20	2	2	0.3	2.25	1.95	6.5	6.5
schooling	Fixed distance transect	20	2	2	0.3	1.75	1.45	4.83333	4.83333
schooling	Fixed distance transect	20	2	2	0.3	1.25	0.95	3.16667	3.16667
schooling	Fixed distance transect	20	2	2	0.3	2.3	2	6.66667	6.66667
schooling	Fixed distance transect	20	2	2	0.3	1.375	1.075	3.58333	3.58333
schooling	Fixed distance transect	20	2	2	0.3	1.925	1.625	5.41667	5.41667
schooling	Fixed distance transect	20	2	2	0.3	1.6	1.3	4.33333	4.33333
schooling	Fixed distance transect	20	2	2	0.3	1.025	0.725	2.41667	2.41667
schooling	Fixed distance transect	20	2	2	0.3	1.85	1.55	5.16667	5.16667
schooling	Fixed distance transect	20	2	4	0.3	1.125	0.825	2.75	2.75
schooling	Fixed distance transect	20	2	4	0.3	0.775	0.475	1.58333	1.58333
schooling	Fixed distance transect	20	2	4	0.3	1.35	1.05	3.5	3.5
schooling	Fixed distance transect	20	2	4	0.3	0.65	0.35	1.16667	1.16667
schooling	Fixed distance transect	20	2	4	0.3	0.95	0.65	2.16667	2.16667
schooling	Fixed distance transect	20	2	4	0.3	0.95	0.65	2.16667	2.16667
schooling	Fixed distance transect	20	2	4	0.3	1.125	0.825	2.75	2.75
schooling	Fixed distance transect	20	2	4	0.3	0.7	0.4	1.33333	1.33333
schooling	Fixed distance transect	20	2	4	0.3	0.85	0.55	1.83333	1.83333
schooling	Fixed distance transect	20	2	4	0.3	0.725	0.425	1.41667	1.41667
schooling	Fixed distance transect	20	2	6	0.3	0.85	0.55	1.83333	1.83333
schooling	Fixed distance transect	20	2	6	0.3	0.75	0.45	1.5	1.5
schooling	Fixed distance transect	20	2	6	0.3	1.225	0.925	3.08333	3.08333
schooling	Fixed distance transect	20	2	6	0.3	0.5	0.2	0.666667	0.666667
schooling	Fixed distance transect	20	2	6	0.3	0.875	0.575	1.91667	1.91667
schooling	Fixed distance transect	20	2	6	0.3	0.65	0.35	1.16667	1.16667
schooling	Fixed distance transect	20	2	6	0.3	0.95	0.65	2.16667	2.16667
schooling	Fixed distance transect	20	2	6	0.3	0.425	0.125	0.416667	0.416667
schooling	Fixed distance transect	20	2	6	0.3	0.9	0.6	2	2
schooling	Fixed distance transect	20	2	6	0.3	0.975	0.675	2.25	2.25
schooling	Fixed distance transect	20	2	8	0.3	0.525	0.225	0.75	0.75
schooling	Fixed distance transect	20	2	8	0.3	0.625	0.325	1.08333	1.08333
schooling	Fixed distance transect	20	2	8	0.3	0.6	0.3	1	1
schooling	Fixed distance transect	20	2	8	0.3	1.075	0.775	2.58333	2.58333
schooling	Fixed distance transect	20	2	8	0.3	0.6	0.3	1	1
schooling	Fixed distance transect	20	2	8	0.3	0.675	0.375	1.25	1.25
schooling	Fixed distance transect	20	2	8	0.3	0.6	0.3	1	1
schooling	Fixed distance transect	20	2	8	0.3	1	0.7	2.33333	2.33333
schooling	Fixed distance transect	20	2	8	0.3	0.425	0.125	0.416667	0.416667
schooling	Fixed distance transect	20	2	8	0.3	0.475	0.175	0.583333	0.583333
schooling	Fixed distance transect	20	2	10	0.3	0.725	0.425	1.41667	1.41667
schooling	Fixed distance transect	20	2	10	0.3	0.65	0.35	1.16667	1.16667
schooling	Fixed distance transect	20	2	10	0.3	0.4	0.1	0.333333	0.333333
schooling	Fixed distance transect	20	2	10	0.3	0.5	0.2	0.666667	0.666667
schooling	Fixed distance transect	20	2	10	0.3	0.3	0	0	0
schooling	Fixed distance transect	20	2	10	0.3	0.65	0.35	1.16667	1.16667
schooling	Fixed distance transect	20	2	10	0.3	0.6	0.3	1	1
schooling	Fixed distance transect	20	2	10	0.3	0.825	0.525	1.75	1.75
schooling	Fixed distance transect	20	2	10	0.3	1	0.7	2.33333	2.33333
schooling	Fixed distance transect	20	2	10	0.3	0.55	0.25	0.833333	0.833333
schooling	Fixed distance transect	20	3	2	0.3	1.3	1	3.33333	3.33333
schooling	Fixed distance transect	20	3	2	0.3	1.417	1.117	3.72333	3.72333
schooling	Fixed distance transect	20	3	2	0.3	1.483	1.183	3.94333	3.94333
schooling	Fixed distance transect	20	3	2	0.3	1.583	1.283	4.27667	4.27667
schooling	Fixed distance transect	20	3	2	0.3	2.317	2.017	6.72333	6.72333
schooling	Fixed distance transect	20	3	2	0.3	1.383	1.083	3.61	3.61
schooling	Fixed distance transect	20	3	2	0.3	1.033	0.733	2.44333	2.44333
schooling	Fixed distance transect	20	3	2	0.3	1.817	1.517	5.05667	5.05667
schooling	Fixed distance transect	20	3	2	0.3	1.4	1.1	3.66667	3.66667
schooling	Fixed distance transect	20	3	2	0.3	1.2	0.9	3	3
schooling	Fixed distance transect	20	3	4	0.3	0.75	0.45	1.5	1.5
schooling	Fixed distance transect	20	3	4	0.3	0.65	0.35	1.16667	1.16667
schooling	Fixed distance transect	20	3	4	0.3	0.9	0.6	2	2
schooling	Fixed distance transect	20	3	4	0.3	0.933	0.633	2.11	2.11
schooling	Fixed distance transect	20	3	4	0.3	0.883	0.583	1.94333	1.94333
schooling	Fixed distance transect	20	3	4	0.3	0.867	0.567	1.89	1.89
schooling	Fixed distance transect	20	3	4	0.3	0.85	0.55	1.83333	1.83333
schooling	Fixed distance transect	20	3	4	0.3	0.783	0.483	1.61	1.61
schooling	Fixed distance transect	20	3	4	0.3	1	0.7	2.33333	2.33333
schooling	Fixed distance transect	20	3	4	0.3	1	0.7	2.33333	2.33333
schooling	Fixed distance transect	20	3	6	0.3	0.6	0.3	1	1
schooling	Fixed distance transect	20	3	6	0.3	0.567	0.267	0.89	0.89
schooling	Fixed distance transect	20	3	6	0.3	0.9	0.6	2	2
schooling	Fixed distance transect	20	3	6	0.3	0.617	0.317	1.05667	1.05667
schooling	Fixed distance transect	20	3	6	0.3	0.667	0.367	1.22333	1.22333
schooling	Fixed distance transect	20	3	6	0.3	0.65	0.35	1.16667	1.16667
schooling	Fixed distance transect	20	3	6	0.3	0.75	0.45	1.5	1.5
schooling	Fixed distance transect	20	3	6	0.3	0.633	0.333	1.11	1.11
schooling	Fixed distance transect	20	3	6	0.3	0.45	0.15	0.5	0.5
schooling	Fixed distance transect	20	3	6	0.3	0.783	0.483	1.61	1.61
schooling	Fixed distance transect	20	3	8	0.3	0.8	0.5	1.66667	1.66667
schooling	Fixed distance transect	20	3	8	0.3	0.5	0.2	0.666667	0.666667
schooling	Fixed distance transect	20	3	8	0.3	0.433	0.133	0.443333	0.443333
schooling	Fixed distance transect	20	3	8	0.3	0.583	0.283	0.943333	0.943333
schooling	Fixed distance transect	20	3	8	0.3	0.75	0.45	1.5	1.5
schooling	Fixed distance transect	20	3	8	0.3	0.733	0.433	1.44333	1.44333
schooling	Fixed distance transect	20	3	8	0.3	0.517	0.217	0.723333	0.723333
schooling	Fixed distance transect	20	3	8	0.3	0.7	0.4	1.33333	1.33333
schooling	Fixed distance transect	20	3	8	0.3	0.567	0.267	0.89	0.89
schooling	Fixed distance transect	20	3	8	0.3	0.783	0.483	1.61	1.61
schooling	Fixed distance transect	20	3	10	0.3	0.7	0.4	1.33333	1.33333
schooling	Fixed distance transect	20	3	10	0.3	0.417	0.117	0.39	0.39
schooling	Fixed distance transect	20	3	10	0.3	0.517	0.217	0.723333	0.723333
schooling	Fixed distance transect	20	3	10	0.3	0.667	0.367	1.22333	1.22333
schooling	Fixed distance transect	20	3	10	0.3	0.417	0.117	0.39	0.39
schooling	Fixed distance transect	20	3	10	0.3	0.533	0.233	0.776667	0.776667
schooling	Fixed distance transect	20	3	10	0.3	0.317	0.017	0.0566667	0.0566667
schooling	Fixed distance transect	20	3	10	0.3	0.467	0.167	0.556667	0.556667
schooling	Fixed distance transect	20	3	10	0.3	0.517	0.217	0.723333	0.723333
schooling	Fixed distance transect	20	3	10	0.3	0.433	0.133	0.443333	0.443333
schooling	Fixed distance transect	20	4	2	0.3	1.4	1.1	3.66667	3.66667
schooling	Fixed distance transect	20	4	2	0.3	1.288	0.988	3.29333	3.29333
schooling	Fixed distance transect	20	4	2	0.3	0.988	0.688	2.29333	2.29333
schooling	Fixed distance transect	20	4	2	0.3	1.588	1.288	4.29333	4.29333
schooling	Fixed distance transect	20	4	2	0.3	1.825	1.525	5.08333	5.08333
schooling	Fixed distance transect	20	4	2	0.3	1.675	1.375	4.58333	4.58333
schooling	Fixed distance transect	20	4	2	0.3	1.3	1	3.33333	3.33333
schooling	Fixed distance transect	20	4	2	0.3	1.625	1.325	4.41667	4.41667
schooling	Fixed distance transect	20	4	2	0.3	1.263	0.963	3.21	3.21
schooling	Fixed distance transect	20	4	2	0.3	0.688	0.388	1.29333	1.29333
schooling	Fixed distance transect	20	4	4	0.3	0.675	0.375	1.25	1.25
schooling	Fixed distance transect	20	4	4	0.3	1.163	0.863	2.87667	2.87667
schooling	Fixed distance transect	20	4	4	0.3	0.663	0.363	1.21	1.21
schooling	Fixed distance transect	20	4	4	0.3	0.875	0.575	1.91667	1.91667
schooling	Fixed distance transect	20	4	4	0.3	1.525	1.225	4.08333	4.08333
schooling	Fixed distance transect	20	4	4	0.3	0.65	0.35	1.16667	1.16667
schooling	Fixed distance transect	20	4	4	0.3	0.675	0.375	1.25	1.25
schooling	Fixed distance transect	20	4	4	0.3	0.388	0.088	0.293333	0.293333
schooling	Fixed distance transect	20	4	4	0.3	1.188	0.888	2.96	2.96
schooling	Fixed distance transect	20	4	4	0.3	0.713	0.413	1.37667	1.37667
schooling	Fixed distance transect	20	4	6	0.3	0.638	0.338	1.12667	1.12667
schooling	Fixed distance transect	20	4	6	0.3	0.663	0.363	1.21	1.21
schooling	Fixed distance transect	20	4	6	0.3	0.4	0.1	0.333333	0.333333
schooling	Fixed distance transect	20	4	6	0.3	0.65	0.35	1.16667	1.16667
schooling	Fixed distance transect	20	4	6	0.3	0.725	0.425	1.41667	1.41667
schooling	Fixed distance transect	20	4	6	0.3	0.438	0.138	0.46	0.46
schooling	Fixed distance transect	20	4	6	0.3	0.438	0.138	0.46	0.46
schooling	Fixed distance transect	20	4	6	0.3	0.438	0.138	0.46	0.46
schooling	Fixed distance transect	20	4	6	0.3	0.85	0.55	1.83333	1.83333
schooling	Fixed distance transect	20	4	6	0.3	0.463	0.163	0.543333	0.543333
schooling	Fixed distance transect	20	4	8	0.3	0.525	0.225	0.75	0.75
schooling	Fixed distance transect	20	4	8	0.3	0.325	0.025	0.0833333	0.0833333
schooling	Fixed distance transect	20	4	8	0.3	0.425	0.125	0.416667	0.416667
schooling	Fixed distance transect	20	4	8	0.3	0.425	0.125	0.416667	0.416667
schooling	Fixed distance transect	20	4	8	0.3	0.325	0.025	0.0833333	0.0833333
schooling	Fixed distance transect	20	4	8	0.3	0.438	0.138	0.46	0.46
schooling	Fixed distance transect	20	4	8	0.3	0.588	0.288	0.96	0.96
schooling	Fixed distance transect	20	4	8	0.3	0.55	0.25	0.833333	0.833333
schooling	Fixed distance transect	20	4	8	0.3	0.4	0.1	0.333333	0.333333
schooling	Fixed distance transect	20	4	8	0.3	0.413	0.113	0.376667	0.376667
schooling	Fixed distance transect	20	4	10	0.3	0.3	0	0	0
schooling	Fixed distance transect	20	4	10	0.3	0.5	0.2	0.666667	0.666667
schooling	Fixed distance transect	20	4	10	0.3	0.625	0.325	1.08333	1.08333
schooling	Fixed distance transect	20	4	10	0.3	0.288	-0.012	-0.04	0.04
schooling	Fixed distance transect	20	4	10	0.3	0.538	0.238	0.793333	0.793333
schooling	Fixed distance transect	20	4	10	0.3	0.563	0.263	0.876667	0.876667
schooling	Fixed distance transect	20	4	10	0.3	0.388	0.088	0.293333	0.293333
schooling	Fixed distance transect	20	4	10	0.3	0.488	0.188	0.626667	0.626667
schooling	Fixed distance transect	20	4	10	0.3	0.575	0.275	0.916667	0.916667
schooling	Fixed distance transect	20	4	10	0.3	0.438	0.138	0.46	0.46
schooling	Fixed distance transect	20	5	2	0.3	1.19	0.89	2.96667	2.96667
schooling	Fixed distance transect	20	5	2	0.3	1.11	0.81	2.7	2.7
schooling	Fixed distance transect	20	5	2	0.3	1.03	0.73	2.43333	2.43333
schooling	Fixed distance transect	20	5	2	0.3	1.38	1.08	3.6	3.6
schooling	Fixed distance transect	20	5	2	0.3	1.18	0.88	2.93333	2.93333
schooling	Fixed distance transect	20	5	2	0.3	1.27	0.97	3.23333	3.23333
schooling	Fixed distance transect	20	5	2	0.3	1.54	1.24	4.13333	4.13333
schooling	Fixed distance transect	20	5	2	0.3	1.09	0.79	2.63333	2.63333
schooling	Fixed distance transect	20	5	2	0.3	1.56	1.26	4.2	4.2
schooling	Fixed distance transect	20	5	2	0.3	1.51	1.21	4.03333	4.03333
schooling	Fixed distance transect	20	5	4	0.3	0.82	0.52	1.73333	1.73333
schooling	Fixed distance transect	20	5	4	0.3	0.54	0.24	0.8	0.8
schooling	Fixed distance transect	20	5	4	0.3	0.7	0.4	1.33333	1.33333
schooling	Fixed distance transect	20	5	4	0.3	1.06	0.76	2.53333	2.53333
schooling	Fixed distance transect	20	5	4	0.3	0.7	0.4	1.33333	1.33333
schooling	Fixed distance transect	20	5	4	0.3	0.88	0.58	1.93333	1.93333
schooling	Fixed distance transect	20	5	4	0.3	0.92	0.62	2.06667	2.06667
schooling	Fixed distance transect	20	5	4	0.3	0.83	0.53	1.76667	1.76667
schooling	Fixed distance transect	20	5	4	0.3	0.8	0.5	1.66667	1.66667
schooling	Fixed distance transect	20	5	4	0.3	0.9	0.6	2	2
schooling	Fixed distance transect	20	5	6	0.3	0.66	0.36	1.2	1.2
schooling	Fixed distance transect	20	5	6	0.3	0.33	0.03	0.1	0.1
schooling	Fixed distance transect	20	5	6	0.3	0.69	0.39	1.3	1.3
schooling	Fixed distance transect	20	5	6	0.3	0.53	0.23	0.766667	0.766667
schooling	Fixed distance transect	20	5	6	0.3	0.8	0.5	1.66667	1.66667
schooling	Fixed distance transect	20	5	6	0.3	0.23	-0.07	-0.233333	0.233333
schooling	Fixed distance transect	20	5	6	0.3	0.56	0.26	0.866667	0.866667
schooling	Fixed distance transect	20	5	6	0.3	0.74	0.44	1.46667	1.46667
schooling	Fixed distance transect	20	5	6	0.3	0.49	0.19	0.633333	0.633333
schooling	Fixed distance transect	20	5	6	0.3	0.42	0.12	0.4	0.4
schooling	Fixed distance transect	20	5	8	0.3	0.46	0.16	0.533333	0.533333
schooling	Fixed distance transect	20	5	8	0.3	0.71	0.41	1.36667	1.36667
schooling	Fixed distance transect	20	5	8	0.3	0.43	0.13	0.433333	0.433333
schooling	Fixed distance transect	20	5	8	0.3	0.28	-0.02	-0.0666667	0.0666667
schooling	Fixed distance transect	20	5	8	0.3	0.53	0.23	0.766667	0.766667
schooling	Fixed distance transect	20	5	8	0.3	0.33	0.03	0.1	0.1
schooling	Fixed distance transect	20	5	8	0.3	0.56	0.26	0.866667	0.866667
schooling	Fixed distance transect	20	5	8	0.3	0.51	0.21	0.7	0.7
schooling	Fixed distance transect	20	5	8	0.3	0.43	0.13	0.433333	0.433333
schooling	Fixed distance transect	20	5	8	0.3	0.49	0.19	0.633333	0.633333
schooling	Fixed distance transect	20	5	10	0.3	0.44	0.14	0.466667	0.466667
schooling	Fixed distance transect	20	5	10	0.3	0.53	0.23	0.766667	0.766667
schooling	Fixed distance transect	20	5	10	0.3	0.46	0.16	0.533333	0.533333
schooling	Fixed distance transect	20	5	10	0.3	0.41	0.11	0.366667	0.366667
schooling	Fixed distance transect	20	5	10	0.3	0.51	0.21	0.7	0.7
schooling	Fixed distance transect	20	5	10	0.3	0.32	0.02	0.0666667	0.0666667
schooling	Fixed distance transect	20	5	10	0.3	0.48	0.18	0.6	0.6
schooling	Fixed distance transect	20	5	10	0.3	0.3	0	0	0
schooling	Fixed distance transect	20	5	10	0.3	0.37	0.07	0.233333	0.233333
schooling	Fixed distance transect	20	5	10	0.3	0.41	0.11	0.366667	0.366667
schooling	Fixed distance transect	30	1	2	0.3	2.9	2.6	8.66667	8.66667
schooling	Fixed distance transect	30	1	2	0.3	2.967	2.667	8.89	8.89
schooling	Fixed distance transect	30	1	2	0.3	2.767	2.467	8.22333	8.22333
schooling	Fixed distance transect	30	1	2	0.3	2.267	1.967	6.55667	6.55667
schooling	Fixed distance transect	30	1	2	0.3	2.9	2.6	8.66667	8.66667
schooling	Fixed distance transect	30	1	2	0.3	3.4	3.1	10.3333	10.3333
schooling	Fixed distance transect	30	1	2	0.3	2.7	2.4	8	8
schooling	Fixed distance transect	30	1	2	0.3	1.133	0.833	2.77667	2.77667
schooling	Fixed distance transect	30	1	2	0.3	2.667	2.367	7.89	7.89
schooling	Fixed distance transect	30	1	2	0.3	2.033	1.733	5.77667	5.77667
schooling	Fixed distance transect	30	1	4	0.3	1.767	1.467	4.89	4.89
schooling	Fixed distance transect	30	1	4	0.3	1.533	1.233	4.11	4.11
schooling	Fixed distance transect	30	1	4	0.3	2.333	2.033	6.77667	6.77667
schooling	Fixed distance transect	30	1	4	0.3	1.4	1.1	3.66667	3.66667
schooling	Fixed distance transect	30	1	4	0.3	2.9	2.6	8.66667	8.66667
schooling	Fixed distance transect	30	1	4	0.3	2.567	2.267	7.55667	7.55667
schooling	Fixed distance transect	30	1	4	0.3	1.233	0.933	3.11	3.11
schooling	Fixed distance transect	30	1	4	0.3	1.433	1.133	3.77667	3.77667
schooling	Fixed distance transect	30	1	4	0.3	0.733	0.433	1.44333	1.44333
schooling	Fixed distance transect	30	1	4	0.3	1.8	1.5	5	5
schooling	Fixed distance transect	30	1	6	0.3	1.067	0.767	2.55667	2.55667
schooling	Fixed distance transect	30	1	6	0.3	1.033	0.733	2.44333	2.44333
schooling	Fixed distance transect	30	1	6	0.3	0.933	0.633	2.11	2.11
schooling	Fixed distance transect	30	1	6	0.3	1.233	0.933	3.11	3.11
schooling	Fixed distance transect	30	1	6	0.3	1.233	0.933	3.11	3.11
schooling	Fixed distance transect	30	1	6	0.3	1.2	0.9	3	3
schooling	Fixed distance transect	30	1	6	0.3	0.8	0.5	1.66667	1.66667
schooling	Fixed distance transect	30	1	6	0.3	1.367	1.067	3.55667	3.55667
schooling	Fixed distance transect	30	1	6	0.3	1.167	0.867	2.89	2.89
schooling	Fixed distance transect	30	1	6	0.3	1.333	1.033	3.44333	3.44333
schooling	Fixed distance transect	30	1	8	0.3	1.233	0.933	3.11	3.11
schooling	Fixed distance transect	30	1	8	0.3	1.067	0.767	2.55667	2.55667
schooling	Fixed distance transect	30	1	8	0.3	0.633	0.333	1.11	1.11
schooling	Fixed distance transect	30	1	8	0.3	0.833	0.533	1.77667	1.77667
schooling	Fixed distance transect	30	1	8	0.3	1.1	0.8	2.66667	2.66667
schooling	Fixed distance transect	30	1	8	0.3	0.567	0.267	0.89	0.89
schooling	Fixed distance transect	30	1	8	0.3	1.133	0.833	2.77667	2.77667
schooling	Fixed distance transect	30	1	8	0.3	1.3	1	3.33333	3.33333
schooling	Fixed distance transect	30	1	8	0.3	0.867	0.567	1.89	1.89
schooling	Fixed distance transect	30	1	8	0.3	0.567	0.267	0.89	0.89
schooling	Fixed distance transect	30	1	10	0.3	0.967	0.667	2.22333	2.22333
schooling	Fixed distance transect	30	1	10	0.3	0.733	0.433	1.44333	1.44333
schooling	Fixed distance transect	30	1	10	0.3	0.867	0.567	1.89	1.89
schooling	Fixed distance transect	30	1	10	0.3	0.867	0.567	1.89	1.89
schooling	Fixed distance transect	30	1	10	0.3	0.8	0.5	1.66667	1.66667
schooling	Fixed distance transect	30	1	10	0.3	0.6	0.3	1	1
schooling	Fixed distance transect	30	1	10	0.3	1.033	0.733	2.44333	2.44333
schooling	Fixed distance transect	30	1	10	0.3	0.633	0.333	1.11	1.11
schooling	Fixed distance transect	30	1	10	0.3	0.7	0.4	1.33333	1.33333
schooling	Fixed distance transect	30	1	10	0.3	0.9	0.6	2	2
schooling	Fixed distance transect	30	2	2	0.3	1.167	0.867	2.89	2.89
schooling	Fixed distance transect	30	2	2	0.3	1.65	1.35	4.5	4.5
schooling	Fixed distance transect	30	2	2	0.3	2.15	1.85	6.16667	6.16667
schooling	Fixed distance transect	30	2	2	0.3	1.417	1.117	3.72333	3.72333
schooling	Fixed distance transect	30	2	2	0.3	1.667	1.367	4.55667	4.55667
schooling	Fixed distance transect	30	2	2	0.3	1.933	1.633	5.44333	5.44333
schooling	Fixed distance transect	30	2	2	0.3	1.8	1.5	5	5
schooling	Fixed distance transect	30	2	2	0.3	1.2	0.9	3	3
schooling	Fixed distance transect	30	2	2	0.3	2.233	1.933	6.44333	6.44333
schooling	Fixed distance transect	30	2	2	0.3	2.083	1.783	5.94333	5.94333
schooling	Fixed distance transect	30	2	4	0.3	1.433	1.133	3.77667	3.77667
schooling	Fixed distance transect	30	2	4	0.3	0.967	0.667	2.22333	2.22333
schooling	Fixed distance transect	30	2	4	0.3	1.133	0.833	2.77667	2.77667
schooling	Fixed distance transect	30	2	4	0.3	1.4	1.1	3.66667	3.66667
schooling	Fixed distance transect	30	2	4	0.3	0.983	0.683	2.27667	2.27667
schooling	Fixed distance transect	30	2	4	0.3	1.167	0.867	2.89	2.89
schooling	Fixed distance transect	30	2	4	0.3	1.417	1.117	3.72333	3.72333
schooling	Fixed distance transect	30	2	4	0.3	1.033	0.733	2.44333	2.44333
schooling	Fixed distance transect	30	2	4	0.3	0.617	0.317	1.05667	1.05667
schooling	Fixed distance transect	30	2	4	0.3	0.667	0.367	1.22333	1.22333
schooling	Fixed distance transect	30	2	6	0.3	0.967	0.667	2.22333	2.22333
schooling	Fixed distance transect	30	2	6	0.3	0.933	0.633	2.11	2.11
schooling	Fixed distance transect	30	2	6	0.3	0.917	0.617	2.05667	2.05667
schooling	Fixed distance transect	30	2	6	0.3	0.917	0.617	2.05667	2.05667
schooling	Fixed distance transect	30	2	6	0.3	0.933	0.633	2.11	2.11
schooling	Fixed distance transect	30	2	6	0.3	0.85	0.55	1.83333	1.83333
schooling	Fixed distance transect	30	2	6	0.3	0.883	0.583	1.94333	1.94333
schooling	Fixed distance transect	30	2	6	0.3	0.85	0.55	1.83333	1.83333
schooling	Fixed distance transect	30	2	6	0.3	0.533	0.233	0.776667	0.776667
schooling	Fixed distance transect	30	2	6	0.3	0.567	0.267	0.89	0.89
schooling	Fixed distance transect	30	2	8	0.3	0.45	0.15	0.5	0.5
schooling	Fixed distance transect	30	2	8	0.3	0.583	0.283	0.943333	0.943333
schooling	Fixed distance transect	30	2	8	0.3	0.683	0.383	1.27667	1.27667
schooling	Fixed distance transect	30	2	8	0.3	0.633	0.333	1.11	1.11
schooling	Fixed distance transect	30	2	8	0.3	0.5	0.2	0.666667	0.666667
schooling	Fixed distance transect	30	2	8	0.3	0.783	0.483	1.61	1.61
schooling	Fixed distance transect	30	2	8	0.3	0.6	0.3	1	1
schooling	Fixed distance transect	30	2	8	0.3	0.95	0.65	2.16667	2.16667
schooling	Fixed distance transect	30	2	8	0.3	0.483	0.183	0.61	0.61
schooling	Fixed distance transect	30	2	8	0.3	0.683	0.383	1.27667	1.27667
schooling	Fixed distance transect	30	2	10	0.3	0.683	0.383	1.27667	1.27667
schooling	Fixed distance transect	30	2	10	0.3	0.75	0.45	1.5	1.5
schooling	Fixed distance transect	30	2	10	0.3	0.667	0.367	1.22333	1.22333
schooling	Fixed distance transect	30	2	10	0.3	0.75	0.45	1.5	1.5
schooling	Fixed distance transect	30	2	10	0.3	0.617	0.317	1.05667	1.05667
schooling	Fixed distance transect	30	2	10	0.3	0.6	0.3	1	1
schooling	Fixed distance transect	30	2	10	0.3	0.433	0.133	0.443333	0.443333
schooling	Fixed distance transect	30	2	10	0.3	0.617	0.317	1.05667	1.05667
schooling	Fixed distance transect	30	2	10	0.3	0.6	0.3	1	1
schooling	Fixed distance transect	30	2	10	0.3	0.6	0.3	1	1
schooling	Fixed distance transect	30	3	2	0.3	0.956	0.656	2.18667	2.18667
schooling	Fixed distance transect	30	3	2	0.3	2.156	1.856	6.18667	6.18667
schooling	Fixed distance transect	30	3	2	0.3	1.556	1.256	4.18667	4.18667
schooling	Fixed distance transect	30	3	2	0.3	1.278	0.978	3.26	3.26
schooling	Fixed distance transect	30	3	2	0.3	1.7	1.4	4.66667	4.66667
schooling	Fixed distance transect	30	3	2	0.3	1.378	1.078	3.59333	3.59333
schooling	Fixed distance transect	30	3	2	0.3	0.989	0.689	2.29667	2.29667
schooling	Fixed distance transect	30	3	2	0.3	1.444	1.144	3.81333	3.81333
schooling	Fixed distance transect	30	3	2	0.3	1.722	1.422	4.74	4.74
schooling	Fixed distance transect	30	3	2	0.3	1.7	1.4	4.66667	4.66667
schooling	Fixed distance transect	30	3	4	0.3	0.833	0.533	1.77667	1.77667
schooling	Fixed distance transect	30	3	4	0.3	1.322	1.022	3.40667	3.40667
schooling	Fixed distance transect	30	3	4	0.3	0.989	0.689	2.29667	2.29667
schooling	Fixed distance transect	30	3	4	0.3	0.978	0.678	2.26	2.26
schooling	Fixed distance transect	30	3	4	0.3	0.922	0.622	2.07333	2.07333
schooling	Fixed distance transect	30	3	4	0.3	0.8	0.5	1.66667	1.66667
schooling	Fixed distance transect	30	3	4	0.3	0.922	0.622	2.07333	2.07333
schooling	Fixed distance transect	30	3	4	0.3	0.678	0.378	1.26	1.26
schooling	Fixed distance transect	30	3	4	0.3	0.878	0.578	1.92667	1.92667
schooling	Fixed distance transect	30	3	4	0.3	0.9	0.6	2	2
schooling	Fixed distance transect	30	3	6	0.3	0.744	0.444	1.48	1.48
schooling	Fixed distance transect	30	3	6	0.3	0.967	0.667	2.22333	2.22333
schooling	Fixed distance transect	30	3	6	0.3	0.567	0.267	0.89	0.89
schooling	Fixed distance transect	30	3	6	0.3	0.444	0.144	0.48	0.48
schooling	Fixed distance transect	30	3	6	0.3	0.767	0.467	1.55667	1.55667
schooling	Fixed distance transect	30	3	6	0.3	0.8	0.5	1.66667	1.66667
schooling	Fixed distance transect	30	3	6	0.3	0.922	0.622	2.07333	2.07333
schooling	Fixed distance transect	30	3	6	0.3	0.456	0.156	0.52	0.52
schooling	Fixed distance transect	30	3	6	0.3	0.667	0.367	1.22333	1.22333
schooling	Fixed distance transect	30	3	6	0.3	0.622	0.322	1.07333	1.07333
schooling	Fixed distance transect	30	3	8	0.3	0.367	0.067	0.223333	0.223333
schooling	Fixed distance transect	30	3	8	0.3	0.644	0.344	1.14667	1.14667
schooling	Fixed distance transect	30	3	8	0.3	0.722	0.422	1.40667	1.40667
schooling	Fixed distance transect	30	3	8	0.3	0.567	0.267	0.89	0.89
schooling	Fixed distance transect	30	3	8	0.3	0.689	0.389	1.29667	1.29667
schooling	Fixed distance transect	30	3	8	0.3	0.578	0.278	0.926667	0.926667
schooling	Fixed distance transect	30	3	8	0.3	0.6	0.3	1	1
schooling	Fixed distance transect	30	3	8	0.3	0.422	0.122	0.406667	0.406667
schooling	Fixed distance transect	30	3	8	0.3	0.589	0.289	0.963333	0.963333
schooling	Fixed distance transect	30	3	8	0.3	0.622	0.322	1.07333	1.07333
schooling	Fixed distance transect	30	3	10	0.3	0.411	0.111	0.37	0.37
schooling	Fixed distance transect	30	3	10	0.3	0.533	0.233	0.776667	0.776667
schooling	Fixed distance transect	30	3	10	0.3	0.389	0.089	0.296667	0.296667
schooling	Fixed distance transect	30	3	10	0.3	0.511	0.211	0.703333	0.703333
schooling	Fixed distance transect	30	3	10	0.3	0.667	0.367	1.22333	1.22333
schooling	Fixed distance transect	30	3	10	0.3	0.522	0.222	0.74	0.74
schooling	Fixed distance transect	30	3	10	0.3	0.356	0.056	0.186667	0.186667
schooling	Fixed distance transect	30	3	10	0.3	0.5	0.2	0.666667	0.666667
schooling	Fixed distance transect	30	3	10	0.3	0.333	0.033	0.11	0.11
schooling	Fixed distance transect	30	3	10	0.3	0.478	0.178	0.593333	0.593333
schooling	Fixed distance transect	30	4	2	0.3	1.683	1.383	4.61	4.61
schooling	Fixed distance transect	30	4	2	0.3	1.85	1.55	5.16667	5.16667
schooling	Fixed distance transect	30	4	2	0.3	1.558	1.258	4.19333	4.19333
schooling	Fixed distance transect	30	4	2	0.3	1.342	1.042	3.47333	3.47333
schooling	Fixed distance transect	30	4	2	0.3	1.5	1.2	4	4
schooling	Fixed distance transect	30	4	2	0.3	1.283	0.983	3.27667	3.27667
schooling	Fixed distance transect	30	4	2	0.3	1.692	1.392	4.64	4.64
schooling	Fixed distance transect	30	4	2	0.3	1.408	1.108	3.69333	3.69333
schooling	Fixed distance transect	30	4	2	0.3	1.5	1.2	4	4
schooling	Fixed distance transect	30	4	2	0.3	1.5	1.2	4	4
schooling	Fixed distance transect	30	4	4	0.3	0.942	0.642	2.14	2.14
schooling	Fixed distance transect	30	4	4	0.3	0.517	0.217	0.723333	0.723333
schooling	Fixed distance transect	30	4	4	0.3	0.608	0.308	1.02667	1.02667
schooling	Fixed distance transect	30	4	4	0.3	0.783	0.483	1.61	1.61
schooling	Fixed distance transect	30	4	4	0.3	1.042	0.742	2.47333	2.47333
schooling	Fixed distance transect	30	4	4	0.3	0.825	0.525	1.75	1.75
schooling	Fixed distance transect	30	4	4	0.3	0.9	0.6	2	2
schooling	Fixed distance transect	30	4	4	0.3	0.65	0.35	1.16667	1.16667
schooling	Fixed distance transect	30	4	4	0.3	0.875	0.575	1.91667	1.91667
schooling	Fixed distance transect	30	4	4	0.3	0.625	0.325	1.08333	1.08333
schooling	Fixed distance transect	30	4	6	0.3	0.592	0.292	0.973333	0.973333
schooling	Fixed distance transect	30	4	6	0.3	0.667	0.367	1.22333	1.22333
schooling	Fixed distance transect	30	4	6	0.3	0.642	0.342	1.14	1.14
schooling	Fixed distance transect	30	4	6	0.3	0.608	0.308	1.02667	1.02667
schooling	Fixed distance transect	30	4	6	0.3	0.392	0.092	0.306667	0.306667
schooling	Fixed distance transect	30	4	6	0.3	0.6	0.3	1	1
schooling	Fixed distance transect	30	4	6	0.3	0.633	0.333	1.11	1.11
schooling	Fixed distance transect	30	4	6	0.3	0.608	0.308	1.02667	1.02667
schooling	Fixed distance transect	30	4	6	0.3	0.517	0.217	0.723333	0.723333
schooling	Fixed distance transect	30	4	6	0.3	0.592	0.292	0.973333	0.973333
schooling	Fixed distance transect	30	4	8	0.3	0.492	0.192	0.64	0.64
schooling	Fixed distance transect	30	4	8	0.3	0.617	0.317	1.05667	1.05667
schooling	Fixed distance transect	30	4	8	0.3	0.55	0.25	0.833333	0.833333
schooling	Fixed distance transect	30	4	8	0.3	0.392	0.092	0.306667	0.306667
schooling	Fixed distance transect	30	4	8	0.3	0.458	0.158	0.526667	0.526667
schooling	Fixed distance transect	30	4	8	0.3	0.75	0.45	1.5	1.5
schooling	Fixed distance transect	30	4	8	0.3	0.45	0.15	0.5	0.5
schooling	Fixed distance transect	30	4	8	0.3	0.542	0.242	0.806667	0.806667
schooling	Fixed distance transect	30	4	8	0.3	0.633	0.333	1.11	1.11
schooling	Fixed distance transect	30	4	8	0.3	0.483	0.183	0.61	0.61
schooling	Fixed distance transect	30	4	10	0.3	0.483	0.183	0.61	0.61
schooling	Fixed distance transect	30	4	10	0.3	0.442	0.142	0.473333	0.473333
schooling	Fixed distance transect	30	4	10	0.3	0.483	0.183	0.61	0.61
schooling	Fixed distance transect	30	4	10	0.3	0.517	0.217	0.723333	0.723333
schooling	Fixed distance transect	30	4	10	0.3	0.55	0.25	0.833333	0.833333
schooling	Fixed distance transect	30	4	10	0.3	0.508	0.208	0.693333	0.693333
schooling	Fixed distance transect	30	4	10	0.3	0.442	0.142	0.473333	0.473333
schooling	Fixed distance transect	30	4	10	0.3	0.4	0.1	0.333333	0.333333
schooling	Fixed distance transect	30	4	10	0.3	0.708	0.408	1.36	1.36
schooling	Fixed distance transect	30	4	10	0.3	0.467	0.167	0.556667	0.556667
schooling	Fixed distance transect	30	5	2	0.3	1.68	1.38	4.6	4.6
schooling	Fixed distance transect	30	5	2	0.3	1.54	1.24	4.13333	4.13333
schooling	Fixed distance transect	30	5	2	0.3	1.66	1.36	4.53333	4.53333
schooling	Fixed distance transect	30	5	2	0.3	1.24	0.94	3.13333	3.13333
schooling	Fixed distance transect	30	5	2	0.3	1.527	1.227	4.09	4.09
schooling	Fixed distance transect	30	5	2	0.3	1.64	1.34	4.46667	4.46667
schooling	Fixed distance transect	30	5	2	0.3	1.28	0.98	3.26667	3.26667
schooling	Fixed distance transect	30	5	2	0.3	1.513	1.213	4.04333	4.04333
schooling	Fixed distance transect	30	5	2	0.3	1.24	0.94	3.13333	3.13333
schooling	Fixed distance transect	30	5	2	0.3	1.647	1.347	4.49	4.49
schooling	Fixed distance transect	30	5	4	0.3	0.467	0.167	0.556667	0.556667
schooling	Fixed distance transect	30	5	4	0.3	0.76	0.46	1.53333	1.53333
schooling	Fixed distance transect	30	5	4	0.3	0.667	0.367	1.22333	1.22333
schooling	Fixed distance transect	30	5	4	0.3	0.847	0.547	1.82333	1.82333
schooling	Fixed distance transect	30	5	4	0.3	0.833	0.533	1.77667	1.77667
schooling	Fixed distance transect	30	5	4	0.3	0.833	0.533	1.77667	1.77667
schooling	Fixed distance transect	30	5	4	0.3	0.653	0.353	1.17667	1.17667
schooling	Fixed distance transect	30	5	4	0.3	0.587	0.287	0.956667	0.956667
schooling	Fixed distance transect	30	5	4	0.3	0.84	0.54	1.8	1.8
schooling	Fixed distance transect	30	5	4	0.3	0.713	0.413	1.37667	1.37667
schooling	Fixed distance transect	30	5	6	0.3	0.547	0.247	0.823333	0.823333
schooling	Fixed distance transect	30	5	6	0.3	0.573	0.273	0.91	0.91
schooling	Fixed distance transect	30	5	6	0.3	0.52	0.22	0.733333	0.733333
schooling	Fixed distance transect	30	5	6	0.3	0.547	0.247	0.823333	0.823333
schooling	Fixed distance transect	30	5	6	0.3	0.573	0.273	0.91	0.91
schooling	Fixed distance transect	30	5	6	0.3	0.573	0.273	0.91	0.91
schooling	Fixed distance transect	30	5	6	0.3	0.54	0.24	0.8	0.8
schooling	Fixed distance transect	30	5	6	0.3	0.66	0.36	1.2	1.2
schooling	Fixed distance transect	30	5	6	0.3	0.547	0.247	0.823333	0.823333
schooling	Fixed distance transect	30	5	6	0.3	0.493	0.193	0.643333	0.643333
schooling	Fixed distance transect	30	5	8	0.3	0.553	0.253	0.843333	0.843333
schooling	Fixed distance transect	30	5	8	0.3	0.433	0.133	0.443333	0.443333
schooling	Fixed distance transect	30	5	8	0.3	0.42	0.12	0.4	0.4
schooling	Fixed distance transect	30	5	8	0.3	0.527	0.227	0.756667	0.756667
schooling	Fixed distance transect	30	5	8	0.3	0.34	0.04	0.133333	0.133333
schooling	Fixed distance transect	30	5	8	0.3	0.48	0.18	0.6	0.6
schooling	Fixed distance transect	30	5	8	0.3	0.673	0.373	1.24333	1.24333
schooling	Fixed distance transect	30	5	8	0.3	0.3	0	0	0
schooling	Fixed distance transect	30	5	8	0.3	0.5	0.2	0.666667	0.666667
schooling	Fixed distance transect	30	5	8	0.3	0.32	0.02	0.0666667	0.0666667
schooling	Fixed distance transect	30	5	10	0.3	0.593	0.293	0.976667	0.976667
schooling	Fixed distance transect	30	5	10	0.3	0.327	0.027	0.09	0.09
schooling	Fixed distance transect	30	5	10	0.3	0.3	0	0	0
schooling	Fixed distance transect	30	5	10	0.3	0.32	0.02	0.0666667	0.0666667
schooling	Fixed distance transect	30	5	10	0.3	0.5	0.2	0.666667	0.666667
schooling	Fixed distance transect	30	5	10	0.3	0.473	0.173	0.576667	0.576667
schooling	Fixed distance transect	30	5	10	0.3	0.56	0.26	0.866667	0.866667
schooling	Fixed distance transect	30	5	10	0.3	0.3	0	0	0
schooling	Fixed distance transect	30	5	10	0.3	0.767	0.467	1.55667	1.55667
schooling	Fixed distance transect	30	5	10	0.3	0.407	0.107	0.356667	0.356667
schooling	Fixed distance transect	40	1	2	0.3	2.375	2.075	6.91667	6.91667
schooling	Fixed distance transect	40	1	2	0.3	2.575	2.275	7.58333	7.58333
schooling	Fixed distance transect	40	1	2	0.3	2.35	2.05	6.83333	6.83333
schooling	Fixed distance transect	40	1	2	0.3	2.325	2.025	6.75	6.75
schooling	Fixed distance transect	40	1	2	0.3	2.3	2	6.66667	6.66667
schooling	Fixed distance transect	40	1	2	0.3	2.3	2	6.66667	6.66667
schooling	Fixed distance transect	40	1	2	0.3	2.875	2.575	8.58333	8.58333
schooling	Fixed distance transect	40	1	2	0.3	2.3	2	6.66667	6.66667
schooling	Fixed distance transect	40	1	2	0.3	2.65	2.35	7.83333	7.83333
schooling	Fixed distance transect	40	1	2	0.3	2.9	2.6	8.66667	8.66667
schooling	Fixed distance transect	40	1	4	0.3	1.8	1.5	5	5
schooling	Fixed distance transect	40	1	4	0.3	1.375	1.075	3.58333	3.58333
schooling	Fixed distance transect	40	1	4	0.3	1.675	1.375	4.58333	4.58333
schooling	Fixed distance transect	40	1	4	0.3	1.4	1.1	3.66667	3.66667
schooling	Fixed distance transect	40	1	4	0.3	1.275	0.975	3.25	3.25
schooling	Fixed distance transect	40	1	4	0.3	1.35	1.05	3.5	3.5
schooling	Fixed distance transect	40	1	4	0.3	0.95	0.65	2.16667	2.16667
schooling	Fixed distance transect	40	1	4	0.3	1.8	1.5	5	5
schooling	Fixed distance transect	40	1	4	0.3	1.625	1.325	4.41667	4.41667
schooling	Fixed distance transect	40	1	4	0.3	1.2	0.9	3	3
schooling	Fixed distance transect	40	1	6	0.3	1.275	0.975	3.25	3.25
schooling	Fixed distance transect	40	1	6	0.3	1.075	0.775	2.58333	2.58333
schooling	Fixed distance transect	40	1	6	0.3	1.5	1.2	4	4
schooling	Fixed distance transect	40	1	6	0.3	1.275	0.975	3.25	3.25
schooling	Fixed distance transect	40	1	6	0.3	1.2	0.9	3	3
schooling	Fixed distance transect	40	1	6	0.3	1.775	1.475	4.91667	4.91667
schooling	Fixed distance transect	40	1	6	0.3	0.9	0.6	2	2
schooling	Fixed distance transect	40	1	6	0.3	1.325	1.025	3.41667	3.41667
schooling	Fixed distance transect	40	1	6	0.3	1.1	0.8	2.66667	2.66667
schooling	Fixed distance transect	40	1	6	0.3	1.6	1.3	4.33333	4.33333
schooling	Fixed distance transect	40	1	8	0.3	1.1	0.8	2.66667	2.66667
schooling	Fixed distance transect	40	1	8	0.3	1	0.7	2.33333	2.33333
schooling	Fixed distance transect	40	1	8	0.3	1.1	0.8	2.66667	2.66667
schooling	Fixed distance transect	40	1	8	0.3	0.625	0.325	1.08333	1.08333
schooling	Fixed distance transect	40	1	8	0.3	1.175	0.875	2.91667	2.91667
schooling	Fixed distance transect	40	1	8	0.3	1.05	0.75	2.5	2.5
schooling	Fixed distance transect	40	1	8	0.3	1.225	0.925	3.08333	3.08333
schooling	Fixed distance transect	40	1	8	0.3	1.05	0.75	2.5	2.5
schooling	Fixed distance transect	40	1	8	0.3	1.025	0.725	2.41667	2.41667
schooling	Fixed distance transect	40	1	8	0.3	0.925	0.625	2.08333	2.08333
schooling	Fixed distance transect	40	1	10	0.3	0.7	0.4	1.33333	1.33333
schooling	Fixed distance transect	40	1	10	0.3	1.15	0.85	2.83333	2.83333
schooling	Fixed distance transect	40	1	10	0.3	0.475	0.175	0.583333	0.583333
schooling	Fixed distance transect	40	1	10	0.3	0.8	0.5	1.66667	1.66667
schooling	Fixed distance transect	40	1	10	0.3	0.85	0.55	1.83333	1.83333
schooling	Fixed distance transect	40	1	10	0.3	0.8	0.5	1.66667	1.66667
schooling	Fixed distance transect	40	1	10	0.3	0.9	0.6	2	2
schooling	Fixed distance transect	40	1	10	0.3	0.775	0.475	1.58333	1.58333
schooling	Fixed distance transect	40	1	10	0.3	1.35	1.05	3.5	3.5
schooling	Fixed distance transect	40	1	10	0.3	0.775	0.475	1.58333	1.58333
schooling	Fixed distance transect	40	2	2	0.3	1.563	1.263	4.21	4.21
schooling	Fixed distance transect	40	2	2	0.3	1.9	1.6	5.33333	5.33333
schooling	Fixed distance transect	40	2	2	0.3	1.9	1.6	5.33333	5.33333
schooling	Fixed distance transect	40	2	2	0.3	1.675	1.375	4.58333	4.58333
schooling	Fixed distance transect	40	2	2	0.3	1.475	1.175	3.91667	3.91667
schooling	Fixed distance transect	40	2	2	0.3	2.038	1.738	5.79333	5.79333
schooling	Fixed distance transect	40	2	2	0.3	1.988	1.688	5.62667	5.62667
schooling	Fixed distance transect	40	2	2	0.3	1.6	1.3	4.33333	4.33333
schooling	Fixed distance transect	40	2	2	0.3	1.975	1.675	5.58333	5.58333
schooling	Fixed distance transect	40	2	2	0.3	1.463	1.163	3.87667	3.87667
schooling	Fixed distance transect	40	2	4	0.3	1.063	0.763	2.54333	2.54333
schooling	Fixed distance transect	40	2	4	0.3	1.2	0.9	3	3
schooling	Fixed distance transect	40	2	4	0.3	1.213	0.913	3.04333	3.04333
schooling	Fixed distance transect	40	2	4	0.3	1.613	1.313	4.37667	4.37667
schooling	Fixed distance transect	40	2	4	0.3	0.725	0.425	1.41667	1.41667
schooling	Fixed distance transect	40	2	4	0.3	1.163	0.863	2.87667	2.87667
schooling	Fixed distance transect	40	2	4	0.3	1.175	0.875	2.91667	2.91667
schooling	Fixed distance transect	40	2	4	0.3	0.988	0.688	2.29333	2.29333
schooling	Fixed distance transect	40	2	4	0.3	1.05	0.75	2.5	2.5
schooling	Fixed distance transect	40	2	4	0.3	1.288	0.988	3.29333	3.29333
schooling	Fixed distance transect	40	2	6	0.3	1.025	0.725	2.41667	2.41667
schooling	Fixed distance transect	40	2	6	0.3	0.525	0.225	0.75	0.75
schooling	Fixed distance transect	40	2	6	0.3	0.425	0.125	0.416667	0.416667
schooling	Fixed distance transect	40	2	6	0.3	0.613	0.313	1.04333	1.04333
schooling	Fixed distance transect	40	2	6	0.3	1.063	0.763	2.54333	2.54333
schooling	Fixed distance transect	40	2	6	0.3	0.75	0.45	1.5	1.5
schooling	Fixed distance transect	40	2	6	0.3	0.788	0.488	1.62667	1.62667
schooling	Fixed distance transect	40	2	6	0.3	1.013	0.713	2.37667	2.37667
schooling	Fixed distance transect	40	2	6	0.3	0.625	0.325	1.08333	1.08333
schooling	Fixed distance transect	40	2	6	0.3	0.688	0.388	1.29333	1.29333
schooling	Fixed distance transect	40	2	8	0.3	0.55	0.25	0.833333	0.833333
schooling	Fixed distance transect	40	2	8	0.3	1	0.7	2.33333	2.33333
schooling	Fixed distance transect	40	2	8	0.3	0.6	0.3	1	1
schooling	Fixed distance transect	40	2	8	0.3	0.75	0.45	1.5	1.5
schooling	Fixed distance transect	40	2	8	0.3	0.675	0.375	1.25	1.25
schooling	Fixed distance transect	40	2	8	0.3	0.775	0.475	1.58333	1.58333
schooling	Fixed distance transect	40	2	8	0.3	0.813	0.513	1.71	1.71
schooling	Fixed distance transect	40	2	8	0.3	0.813	0.513	1.71	1.71
schooling	Fixed distance transect	40	2	8	0.3	0.5	0.2	0.666667	0.666667
schooling	Fixed distance transect	40	2	8	0.3	0.5	0.2	0.666667	0.666667
schooling	Fixed distance transect	40	2	10	0.3	0.55	0.25	0.833333	0.833333
schooling	Fixed distance transect	40	2	10	0.3	0.788	0.488	1.62667	1.62667
schooling	Fixed distance transect	40	2	10	0.3	0.688	0.388	1.29333	1.29333
schooling	Fixed distance transect	40	2	10	0.3	0.525	0.225	0.75	0.75
schooling	Fixed distance transect	40	2	10	0.3	0.663	0.363	1.21	1.21
schooling	Fixed distance transect	40	2	10	0.3	0.675	0.375	1.25	1.25
schooling	Fixed distance transect	40	2	10	0.3	0.475	0.175	0.583333	0.583333
schooling	Fixed distance transect	40	2	10	0.3	0.813	0.513	1.71	1.71
schooling	Fixed distance transect	40	2	10	0.3	0.263	-0.037	-0.123333	0.123333
schooling	Fixed distance transect	40	2	10	0.3	0.625	0.325	1.08333	1.08333
schooling	Fixed distance transect	40	3	2	0.3	1.933	1.633	5.44333	5.44333
schooling	Fixed distance transect	40	3	2	0.3	1.608	1.308	4.36	4.36
schooling	Fixed distance transect	40	3	2	0.3	1.567	1.267	4.22333	4.22333
schooling	Fixed distance transect	40	3	2	0.3	1.142	0.842	2.80667	2.80667
schooling	Fixed distance transect	40	3	2	0.3	1.858	1.558	5.19333	5.19333
schooling	Fixed distance transect	40	3	2	0.3	2	1.7	5.66667	5.66667
schooling	Fixed distance transect	40	3	2	0.3	1.617	1.317	4.39	4.39
schooling	Fixed distance transect	40	3	2	0.3	2	1.7	5.66667	5.66667
schooling	Fixed distance transect	40	3	2	0.3	1.117	0.817	2.72333	2.72333
schooling	Fixed distance transect	40	3	2	0.3	1.633	1.333	4.44333	4.44333
schooling	Fixed distance transect	40	3	4	0.3	1.275	0.975	3.25	3.25
schooling	Fixed distance transect	40	3	4	0.3	0.708	0.408	1.36	1.36
schooling	Fixed distance transect	40	3	4	0.3	1.025	0.725	2.41667	2.41667
schooling	Fixed distance transect	40	3	4	0.3	0.65	0.35	1.16667	1.16667
schooling	Fixed distance transect	40	3	4	0.3	0.875	0.575	1.91667	1.91667
schooling	Fixed distance transect	40	3	4	0.3	0.667	0.367	1.22333	1.22333
schooling	Fixed distance transect	40	3	4	0.3	1.167	0.867	2.89	2.89
schooling	Fixed distance transect	40	3	4	0.3	0.867	0.567	1.89	1.89
schooling	Fixed distance transect	40	3	4	0.3	1.1	0.8	2.66667	2.66667
schooling	Fixed distance transect	40	3	4	0.3	1.15	0.85	2.83333	2.83333
schooling	Fixed distance transect	40	3	6	0.3	0.608	0.308	1.02667	1.02667
schooling	Fixed distance transect	40	3	6	0.3	0.975	0.675	2.25	2.25
schooling	Fixed distance transect	40	3	6	0.3	0.775	0.475	1.58333	1.58333
schooling	Fixed distance transect	40	3	6	0.3	0.817	0.517	1.72333	1.72333
schooling	Fixed distance transect	40	3	6	0.3	0.55	0.25	0.833333	0.833333
schooling	Fixed distance transect	40	3	6	0.3	0.758	0.458	1.52667	1.52667
schooling	Fixed distance transect	40	3	6	0.3	0.55	0.25	0.833333	0.833333
schooling	Fixed distance transect	40	3	6	0.3	0.842	0.542	1.80667	1.80667
schooling	Fixed distance transect	40	3	6	0.3	0.725	0.425	1.41667	1.41667
schooling	Fixed distance transect	40	3	6	0.3	0.558	0.258	0.86	0.86
schooling	Fixed distance transect	40	3	8	0.3	0.442	0.142	0.473333	0.473333
schooling	Fixed distance transect	40	3	8	0.3	0.608	0.308	1.02667	1.02667
schooling	Fixed distance transect	40	3	8	0.3	0.567	0.267	0.89	0.89
schooling	Fixed distance transect	40	3	8	0.3	0.492	0.192	0.64	0.64
schooling	Fixed distance transect	40	3	8	0.3	0.533	0.233	0.776667	0.776667
schooling	Fixed distance transect	40	3	8	0.3	0.65	0.35	1.16667	1.16667
schooling	Fixed distance transect	40	3	8	0.3	0.475	0.175	0.583333	0.583333
schooling	Fixed distance transect	40	3	8	0.3	0.6	0.3	1	1
schooling	Fixed distance transect	40	3	8	0.3	0.583	0.283	0.943333	0.943333
schooling	Fixed distance transect	40	3	8	0.3	0.558	0.258	0.86	0.86
schooling	Fixed distance transect	40	3	10	0.3	0.517	0.217	0.723333	0.723333
schooling	Fixed distance transect	40	3	10	0.3	0.65	0.35	1.16667	1.16667
schooling	Fixed distance transect	40	3	10	0.3	0.75	0.45	1.5	1.5
schooling	Fixed distance transect	40	3	10	0.3	0.517	0.217	0.723333	0.723333
schooling	Fixed distance transect	40	3	10	0.3	0.383	0.083	0.276667	0.276667
schooling	Fixed distance transect	40	3	10	0.3	0.65	0.35	1.16667	1.16667
schooling	Fixed distance transect	40	3	10	0.3	0.558	0.258	0.86	0.86
schooling	Fixed distance transect	40	3	10	0.3	0.558	0.258	0.86	0.86
schooling	Fixed distance transect	40	3	10	0.3	0.408	0.108	0.36	0.36
schooling	Fixed distance transect	40	3	10	0.3	0.5	0.2	0.666667	0.666667
schooling	Fixed distance transect	40	4	2	0.3	1.588	1.288	4.29333	4.29333
schooling	Fixed distance transect	40	4	2	0.3	1.425	1.125	3.75	3.75
schooling	Fixed distance transect	40	4	2	0.3	1.406	1.106	3.68667	3.68667
schooling	Fixed distance transect	40	4	2	0.3	1.3	1	3.33333	3.33333
schooling	Fixed distance transect	40	4	2	0.3	1.331	1.031	3.43667	3.43667
schooling	Fixed distance transect	40	4	2	0.3	1.575	1.275	4.25	4.25
schooling	Fixed distance transect	40	4	2	0.3	1.363	1.063	3.54333	3.54333
schooling	Fixed distance transect	40	4	2	0.3	1.669	1.369	4.56333	4.56333
schooling	Fixed distance transect	40	4	2	0.3	1.5	1.2	4	4
schooling	Fixed distance transect	40	4	2	0.3	1.575	1.275	4.25	4.25
schooling	Fixed distance transect	40	4	4	0.3	0.55	0.25	0.833333	0.833333
schooling	Fixed distance transect	40	4	4	0.3	1.2	0.9	3	3
schooling	Fixed distance transect	40	4	4	0.3	0.769	0.469	1.56333	1.56333
schooling	Fixed distance transect	40	4	4	0.3	0.631	0.331	1.10333	1.10333
schooling	Fixed distance transect	40	4	4	0.3	0.875	0.575	1.91667	1.91667
schooling	Fixed distance transect	40	4	4	0.3	0.963	0.663	2.21	2.21
schooling	Fixed distance transect	40	4	4	0.3	0.656	0.356	1.18667	1.18667
schooling	Fixed distance transect	40	4	4	0.3	1.006	0.706	2.35333	2.35333
schooling	Fixed distance transect	40	4	4	0.3	0.744	0.444	1.48	1.48
schooling	Fixed distance transect	40	4	4	0.3	0.644	0.344	1.14667	1.14667
schooling	Fixed distance transect	40	4	6	0.3	0.613	0.313	1.04333	1.04333
schooling	Fixed distance transect	40	4	6	0.3	0.675	0.375	1.25	1.25
schooling	Fixed distance transect	40	4	6	0.3	0.656	0.356	1.18667	1.18667
schooling	Fixed distance transect	40	4	6	0.3	0.75	0.45	1.5	1.5
schooling	Fixed distance transect	40	4	6	0.3	0.538	0.238	0.793333	0.793333
schooling	Fixed distance transect	40	4	6	0.3	0.619	0.319	1.06333	1.06333
schooling	Fixed distance transect	40	4	6	0.3	0.756	0.456	1.52	1.52
schooling	Fixed distance transect	40	4	6	0.3	0.588	0.288	0.96	0.96
schooling	Fixed distance transect	40	4	6	0.3	0.631	0.331	1.10333	1.10333
schooling	Fixed distance transect	40	4	6	0.3	0.675	0.375	1.25	1.25
schooling	Fixed distance transect	40	4	8	0.3	0.463	0.163	0.543333	0.543333
schooling	Fixed distance transect	40	4	8	0.3	0.425	0.125	0.416667	0.416667
schooling	Fixed distance transect	40	4	8	0.3	0.494	0.194	0.646667	0.646667
schooling	Fixed distance transect	40	4	8	0.3	0.463	0.163	0.543333	0.543333
schooling	Fixed distance transect	40	4	8	0.3	0.525	0.225	0.75	0.75
schooling	Fixed distance transect	40	4	8	0.3	0.481	0.181	0.603333	0.603333
schooling	Fixed distance transect	40	4	8	0.3	0.663	0.363	1.21	1.21
schooling	Fixed distance transect	40	4	8	0.3	0.581	0.281	0.936667	0.936667
schooling	Fixed distance transect	40	4	8	0.3	0.606	0.306	1.02	1.02
schooling	Fixed distance transect	40	4	8	0.3	0.463	0.163	0.543333	0.543333
schooling	Fixed distance transect	40	4	10	0.3	0.463	0.163	0.543333	0.543333
schooling	Fixed distance transect	40	4	10	0.3	0.475	0.175	0.583333	0.583333
schooling	Fixed distance transect	40	4	10	0.3	0.563	0.263	0.876667	0.876667
schooling	Fixed distance transect	40	4	10	0.3	0.45	0.15	0.5	0.5
schooling	Fixed distance transect	40	4	10	0.3	0.525	0.225	0.75	0.75
schooling	Fixed distance transect	40	4	10	0.3	0.438	0.138	0.46	0.46
schooling	Fixed distance transect	40	4	10	0.3	0.375	0.075	0.25	0.25
schooling	Fixed distance transect	40	4	10	0.3	0.475	0.175	0.583333	0.583333
schooling	Fixed distance transect	40	4	10	0.3	0.431	0.131	0.436667	0.436667
schooling	Fixed distance transect	40	4	10	0.3	0.463	0.163	0.543333	0.543333
schooling	Fixed distance transect	40	5	2	0.3	1.27	0.97	3.23333	3.23333
schooling	Fixed distance transect	40	5	2	0.3	1.215	0.915	3.05	3.05
schooling	Fixed distance transect	40	5	2	0.3	1.125	0.825	2.75	2.75
schooling	Fixed distance transect	40	5	2	0.3	1.285	0.985	3.28333	3.28333
schooling	Fixed distance transect	40	5	2	0.3	0.96	0.66	2.2	2.2
schooling	Fixed distance transect	40	5	2	0.3	1.37	1.07	3.56667	3.56667
schooling	Fixed distance transect	40	5	2	0.3	0.995	0.695	2.31667	2.31667
schooling	Fixed distance transect	40	5	2	0.3	1.58	1.28	4.26667	4.26667
schooling	Fixed distance transect	40	5	2	0.3	1.445	1.145	3.81667	3.81667
schooling	Fixed distance transect	40	5	2	0.3	1.29	0.99	3.3	3.3
schooling	Fixed distance transect	40	5	4	0.3	0.83	0.53	1.76667	1.76667
schooling	Fixed distance transect	40	5	4	0.3	0.94	0.64	2.13333	2.13333
schooling	Fixed distance transect	40	5	4	0.3	0.885	0.585	1.95	1.95
schooling	Fixed distance transect	40	5	4	0.3	0.9	0.6	2	2
schooling	Fixed distance transect	40	5	4	0.3	0.84	0.54	1.8	1.8
schooling	Fixed distance transect	40	5	4	0.3	0.67	0.37	1.23333	1.23333
schooling	Fixed distance transect	40	5	4	0.3	0.63	0.33	1.1	1.1
schooling	Fixed distance transect	40	5	4	0.3	0.725	0.425	1.41667	1.41667
schooling	Fixed distance transect	40	5	4	0.3	0.88	0.58	1.93333	1.93333
schooling	Fixed distance transect	40	5	4	0.3	0.625	0.325	1.08333	1.08333
schooling	Fixed distance transect	40	5	6	0.3	0.535	0.235	0.783333	0.783333
schooling	Fixed distance transect	40	5	6	0.3	0.575	0.275	0.916667	0.916667
schooling	Fixed distance transect	40	5	6	0.3	0.68	0.38	1.26667	1.26667
schooling	Fixed distance transect	40	5	6	0.3	0.615	0.315	1.05	1.05
schooling	Fixed distance transect	40	5	6	0.3	0.62	0.32	1.06667	1.06667
schooling	Fixed distance transect	40	5	6	0.3	0.8	0.5	1.66667	1.66667
schooling	Fixed distance transect	40	5	6	0.3	0.48	0.18	0.6	0.6
schooling	Fixed distance transect	40	5	6	0.3	0.71	0.41	1.36667	1.36667
schooling	Fixed distance transect	40	5	6	0.3	0.57	0.27	0.9	0.9
schooling	Fixed distance transect	40	5	6	0.3	0.59	0.29	0.966667	0.966667
schooling	Fixed distance transect	40	5	8	0.3	0.475	0.175	0.583333	0.583333
schooling	Fixed distance transect	40	5	8	0.3	0.415	0.115	0.383333	0.383333
schooling	Fixed distance transect	40	5	8	0.3	0.505	0.205	0.683333	0.683333
schooling	Fixed distance transect	40	5	8	0.3	0.475	0.175	0.583333	0.583333
schooling	Fixed distance transect	40	5	8	0.3	0.495	0.195	0.65	0.65
schooling	Fixed distance transect	40	5	8	0.3	0.645	0.345	1.15	1.15
schooling	Fixed distance transect	40	5	8	0.3	0.46	0.16	0.533333	0.533333
schooling	Fixed distance transect	40	5	8	0.3	0.42	0.12	0.4	0.4
schooling	Fixed distance transect	40	5	8	0.3	0.59	0.29	0.966667	0.966667
schooling	Fixed distance transect	40	5	8	0.3	0.465	0.165	0.55	0.55
schooling	Fixed distance transect	40	5	10	0.3	0.43	0.13	0.433333	0.433333
schooling	Fixed distance transect	40	5	10	0.3	0.565	0.265	0.883333	0.883333
schooling	Fixed distance transect	40	5	10	0.3	0.375	0.075	0.25	0.25
schooling	Fixed distance transect	40	5	10	0.3	0.45	0.15	0.5	0.5
schooling	Fixed distance transect	40	5	10	0.3	0.495	0.195	0.65	0.65
schooling	Fixed distance transect	40	5	10	0.3	0.48	0.18	0.6	0.6
schooling	Fixed distance transect	40	5	10	0.3	0.275	-0.025	-0.0833333	0.0833333
schooling	Fixed distance transect	40	5	10	0.3	0.49	0.19	0.633333	0.633333
schooling	Fixed distance transect	40	5	10	0.3	0.59	0.29	0.966667	0.966667
schooling	Fixed distance transect	40	5	10	0.3	0.445	0.145	0.483333	0.483333
schooling	Fixed distance transect	50	1	2	0.3	3.86	3.56	11.8667	11.8667
schooling	Fixed distance transect	50	1	2	0.3	2.78	2.48	8.26667	8.26667
schooling	Fixed distance transect	50	1	2	0.3	2.74	2.44	8.13333	8.13333
schooling	Fixed distance transect	50	1	2	0.3	3	2.7	9	9
schooling	Fixed distance transect	50	1	2	0.3	2.52	2.22	7.4	7.4
schooling	Fixed distance transect	50	1	2	0.3	3.68	3.38	11.2667	11.2667
schooling	Fixed distance transect	50	1	2	0.3	2.32	2.02	6.73333	6.73333
schooling	Fixed distance transect	50	1	2	0.3	3.22	2.92	9.73333	9.73333
schooling	Fixed distance transect	50	1	2	0.3	2.74	2.44	8.13333	8.13333
schooling	Fixed distance transect	50	1	2	0.3	2.28	1.98	6.6	6.6
schooling	Fixed distance transect	50	1	4	0.3	1.12	0.82	2.73333	2.73333
schooling	Fixed distance transect	50	1	4	0.3	1.36	1.06	3.53333	3.53333
schooling	Fixed distance transect	50	1	4	0.3	1.28	0.98	3.26667	3.26667
schooling	Fixed distance transect	50	1	4	0.3	1.6	1.3	4.33333	4.33333
schooling	Fixed distance transect	50	1	4	0.3	1.36	1.06	3.53333	3.53333
schooling	Fixed distance transect	50	1	4	0.3	1.42	1.12	3.73333	3.73333
schooling	Fixed distance transect	50	1	4	0.3	1.78	1.48	4.93333	4.93333
schooling	Fixed distance transect	50	1	4	0.3	1.76	1.46	4.86667	4.86667
schooling	Fixed distance transect	50	1	4	0.3	1.34	1.04	3.46667	3.46667
schooling	Fixed distance transect	50	1	4	0.3	1.92	1.62	5.4	5.4
schooling	Fixed distance transect	50	1	6	0.3	1.14	0.84	2.8	2.8
schooling	Fixed distance transect	50	1	6	0.3	1.24	0.94	3.13333	3.13333
schooling	Fixed distance transect	50	1	6	0.3	1.16	0.86	2.86667	2.86667
schooling	Fixed distance transect	50	1	6	0.3	1.32	1.02	3.4	3.4
schooling	Fixed distance transect	50	1	6	0.3	0.94	0.64	2.13333	2.13333
schooling	Fixed distance transect	50	1	6	0.3	1.6	1.3	4.33333	4.33333
schooling	Fixed distance transect	50	1	6	0.3	1.16	0.86	2.86667	2.86667
schooling	Fixed distance transect	50	1	6	0.3	1.28	0.98	3.26667	3.26667
schooling	Fixed distance transect	50	1	6	0.3	1.02	0.72	2.4	2.4
schooling	Fixed distance transect	50	1	6	0.3	1.26	0.96	3.2	3.2
schooling	Fixed distance transect	50	1	8	0.3	0.9	0.6	2	2
schooling	Fixed distance transect	50	1	8	0.3	0.86	0.56	1.86667	1.86667
schooling	Fixed distance transect	50	1	8	0.3	1.02	0.72	2.4	2.4
schooling	Fixed distance transect	50	1	8	0.3	0.74	0.44	1.46667	1.46667
schooling	Fixed distance transect	50	1	8	0.3	1.16	0.86	2.86667	2.86667
schooling	Fixed distance transect	50	1	8	0.3	1.22	0.92	3.06667	3.06667
schooling	Fixed distance transect	50	1	8	0.3	1.06	0.76	2.53333	2.53333
schooling	Fixed distance transect	50	1	8	0.3	0.92	0.62	2.06667	2.06667
schooling	Fixed distance transect	50	1	8	0.3	1.38	1.08	3.6	3.6
schooling	Fixed distance transect	50	1	8	0.3	1.28	0.98	3.26667	3.26667
schooling	Fixed distance transect	50	1	10	0.3	1.14	0.84	2.8	2.8
schooling	Fixed distance transect	50	1	10	0.3	0.84	0.54	1.8	1.8
schooling	Fixed distance transect	50	1	10	0.3	0.98	0.68	2.26667	2.26667
schooling	Fixed distance transect	50	1	10	0.3	0.82	0.52	1.73333	1.73333
schooling	Fixed distance transect	50	1	10	0.3	1.14	0.84	2.8	2.8
schooling	Fixed distance transect	50	1	10	0.3	0.58	0.28	0.933333	0.933333
schooling	Fixed distance transect	50	1	10	0.3	0.74	0.44	1.46667	1.46667
schooling	Fixed distance transect	50	1	10	0.3	0.82	0.52	1.73333	1.73333
schooling	Fixed distance transect	50	1	10	0.3	0.96	0.66	2.2	2.2
schooling	Fixed distance transect	50	1	10	0.3	0.64	0.34	1.13333	1.13333
schooling	Fixed distance transect	50	2	2	0.3	1.66	1.36	4.53333	4.53333
schooling	Fixed distance transect	50	2	2	0.3	1.37	1.07	3.56667	3.56667
schooling	Fixed distance transect	50	2	2	0.3	2.12	1.82	6.06667	6.06667
schooling	Fixed distance transect	50	2	2	0.3	1.81	1.51	5.03333	5.03333
schooling	Fixed distance transect	50	2	2	0.3	1.67	1.37	4.56667	4.56667
schooling	Fixed distance transect	50	2	2	0.3	2.14	1.84	6.13333	6.13333
schooling	Fixed distance transect	50	2	2	0.3	1.84	1.54	5.13333	5.13333
schooling	Fixed distance transect	50	2	2	0.3	1.47	1.17	3.9	3.9
schooling	Fixed distance transect	50	2	2	0.3	1.95	1.65	5.5	5.5
schooling	Fixed distance transect	50	2	2	0.3	1.8	1.5	5	5
schooling	Fixed distance transect	50	2	4	0.3	1.05	0.75	2.5	2.5
schooling	Fixed distance transect	50	2	4	0.3	1.15	0.85	2.83333	2.83333
schooling	Fixed distance transect	50	2	4	0.3	1.28	0.98	3.26667	3.26667
schooling	Fixed distance transect	50	2	4	0.3	1.18	0.88	2.93333	2.93333
schooling	Fixed distance transect	50	2	4	0.3	1.26	0.96	3.2	3.2
schooling	Fixed distance transect	50	2	4	0.3	1.11	0.81	2.7	2.7
schooling	Fixed distance transect	50	2	4	0.3	1.32	1.02	3.4	3.4
schooling	Fixed distance transect	50	2	4	0.3	1.02	0.72	2.4	2.4
schooling	Fixed distance transect	50	2	4	0.3	1.17	0.87	2.9	2.9
schooling	Fixed distance transect	50	2	4	0.3	1.16	0.86	2.86667	2.86667
schooling	Fixed distance transect	50	2	6	0.3	0.96	0.66	2.2	2.2
schooling	Fixed distance transect	50	2	6	0.3	0.71	0.41	1.36667	1.36667
schooling	Fixed distance transect	50	2	6	0.3	1	0.7	2.33333	2.33333
schooling	Fixed distance transect	50	2	6	0.3	0.52	0.22	0.733333	0.733333
schooling	Fixed distance transect	50	2	6	0.3	0.86	0.56	1.86667	1.86667
schooling	Fixed distance transect	50	2	6	0.3	0.87	0.57	1.9	1.9
schooling	Fixed distance transect	50	2	6	0.3	0.72	0.42	1.4	1.4
schooling	Fixed distance transect	50	2	6	0.3	1.12	0.82	2.73333	2.73333
schooling	Fixed distance transect	50	2	6	0.3	1.06	0.76	2.53333	2.53333
schooling	Fixed distance transect	50	2	6	0.3	0.8	0.5	1.66667	1.66667
schooling	Fixed distance transect	50	2	8	0.3	0.65	0.35	1.16667	1.16667
schooling	Fixed distance transect	50	2	8	0.3	0.67	0.37	1.23333	1.23333
schooling	Fixed distance transect	50	2	8	0.3	0.85	0.55	1.83333	1.83333
schooling	Fixed distance transect	50	2	8	0.3	0.59	0.29	0.966667	0.966667
schooling	Fixed distance transect	50	2	8	0.3	0.71	0.41	1.36667	1.36667
schooling	Fixed distance transect	50	2	8	0.3	0.79	0.49	1.63333	1.63333
schooling	Fixed distance transect	50	2	8	0.3	0.47	0.17	0.566667	0.566667
schooling	Fixed distance transect	50	2	8	0.3	0.53	0.23	0.766667	0.766667
schooling	Fixed distance transect	50	2	8	0.3	0.63	0.33	1.1	1.1
schooling	Fixed distance transect	50	2	8	0.3	0.9	0.6	2	2
schooling	Fixed distance transect	50	2	10	0.3	0.48	0.18	0.6	0.6
schooling	Fixed distance transect	50	2	10	0.3	0.35	0.05	0.166667	0.166667
schooling	Fixed distance transect	50	2	10	0.3	0.68	0.38	1.26667	1.26667
schooling	Fixed distance transect	50	2	10	0.3	0.53	0.23	0.766667	0.766667
schooling	Fixed distance transect	50	2	10	0.3	0.48	0.18	0.6	0.6
schooling	Fixed distance transect	50	2	10	0.3	0.85	0.55	1.83333	1.83333
schooling	Fixed distance transect	50	2	10	0.3	0.62	0.32	1.06667	1.06667
schooling	Fixed distance transect	50	2	10	0.3	0.39	0.09	0.3	0.3
schooling	Fixed distance transect	50	2	10	0.3	0.71	0.41	1.36667	1.36667
schooling	Fixed distance transect	50	2	10	0.3	0.6	0.3	1	1
schooling	Fixed distance transect	50	3	2	0.3	1.167	0.867	2.89	2.89
schooling	Fixed distance transect	50	3	2	0.3	1.547	1.247	4.15667	4.15667
schooling	Fixed distance transect	50	3	2	0.3	1.753	1.453	4.84333	4.84333
schooling	Fixed distance transect	50	3	2	0.3	1.92	1.62	5.4	5.4
schooling	Fixed distance transect	50	3	2	0.3	1.773	1.473	4.91	4.91
schooling	Fixed distance transect	50	3	2	0.3	1.653	1.353	4.51	4.51
schooling	Fixed distance transect	50	3	2	0.3	2.167	1.867	6.22333	6.22333
schooling	Fixed distance transect	50	3	2	0.3	1.747	1.447	4.82333	4.82333
schooling	Fixed distance transect	50	3	2	0.3	1.78	1.48	4.93333	4.93333
schooling	Fixed distance transect	50	3	2	0.3	1.74	1.44	4.8	4.8
schooling	Fixed distance transect	50	3	4	0.3	1.107	0.807	2.69	2.69
schooling	Fixed distance transect	50	3	4	0.3	0.933	0.633	2.11	2.11
schooling	Fixed distance transect	50	3	4	0.3	0.86	0.56	1.86667	1.86667
schooling	Fixed distance transect	50	3	4	0.3	0.847	0.547	1.82333	1.82333
schooling	Fixed distance transect	50	3	4	0.3	0.787	0.487	1.62333	1.62333
schooling	Fixed distance transect	50	3	4	0.3	0.933	0.633	2.11	2.11
schooling	Fixed distance transect	50	3	4	0.3	0.72	0.42	1.4	1.4
schooling	Fixed distance transect	50	3	4	0.3	1.167	0.867	2.89	2.89
schooling	Fixed distance transect	50	3	4	0.3	0.807	0.507	1.69	1.69
schooling	Fixed distance transect	50	3	4	0.3	0.7	0.4	1.33333	1.33333
schooling	Fixed distance transect	50	3	6	0.3	0.527	0.227	0.756667	0.756667
schooling	Fixed distance transect	50	3	6	0.3	0.713	0.413	1.37667	1.37667
schooling	Fixed distance transect	50	3	6	0.3	0.72	0.42	1.4	1.4
schooling	Fixed distance transect	50	3	6	0.3	0.82	0.52	1.73333	1.73333
schooling	Fixed distance transect	50	3	6	0.3	0.76	0.46	1.53333	1.53333
schooling	Fixed distance transect	50	3	6	0.3	0.76	0.46	1.53333	1.53333
schooling	Fixed distance transect	50	3	6	0.3	0.673	0.373	1.24333	1.24333
schooling	Fixed distance transect	50	3	6	0.3	0.747	0.447	1.49	1.49
schooling	Fixed distance transect	50	3	6	0.3	0.533	0.233	0.776667	0.776667
schooling	Fixed distance transect	50	3	6	0.3	0.92	0.62	2.06667	2.06667
schooling	Fixed distance transect	50	3	8	0.3	0.767	0.467	1.55667	1.55667
schooling	Fixed distance transect	50	3	8	0.3	0.473	0.173	0.576667	0.576667
schooling	Fixed distance transect	50	3	8	0.3	0.607	0.307	1.02333	1.02333
schooling	Fixed distance transect	50	3	8	0.3	0.607	0.307	1.02333	1.02333
schooling	Fixed distance transect	50	3	8	0.3	0.593	0.293	0.976667	0.976667
schooling	Fixed distance transect	50	3	8	0.3	0.593	0.293	0.976667	0.976667
schooling	Fixed distance transect	50	3	8	0.3	0.613	0.313	1.04333	1.04333
schooling	Fixed distance transect	50	3	8	0.3	0.747	0.447	1.49	1.49
schooling	Fixed distance transect	50	3	8	0.3	0.673	0.373	1.24333	1.24333
schooling	Fixed distance transect	50	3	8	0.3	0.527	0.227	0.756667	0.756667
schooling	Fixed distance transect	50	3	10	0.3	0.54	0.24	0.8	0.8
schooling	Fixed distance transect	50	3	10	0.3	0.36	0.06	0.2	0.2
schooling	Fixed distance transect	50	3	10	0.3	0.427	0.127	0.423333	0.423333
schooling	Fixed distance transect	50	3	10	0.3	0.353	0.053	0.176667	0.176667
schooling	Fixed distance transect	50	3	10	0.3	0.393	0.093	0.31	0.31
schooling	Fixed distance transect	50	3	10	0.3	0.48	0.18	0.6	0.6
schooling	Fixed distance transect	50	3	10	0.3	0.693	0.393	1.31	1.31
schooling	Fixed distance transect	50	3	10	0.3	0.527	0.227	0.756667	0.756667
schooling	Fixed distance transect	50	3	10	0.3	0.453	0.153	0.51	0.51
schooling	Fixed distance transect	50	3	10	0.3	0.54	0.24	0.8	0.8
schooling	Fixed distance transect	50	4	2	0.3	1.605	1.305	4.35	4.35
schooling	Fixed distance transect	50	4	2	0.3	1.515	1.215	4.05	4.05
schooling	Fixed distance transect	50	4	2	0.3	1.665	1.365	4.55	4.55
schooling	Fixed distance transect	50	4	2	0.3	1.25	0.95	3.16667	3.16667
schooling	Fixed distance transect	50	4	2	0.3	1.24	0.94	3.13333	3.13333
schooling	Fixed distance transect	50	4	2	0.3	1.47	1.17	3.9	3.9
schooling	Fixed distance transect	50	4	2	0.3	1.305	1.005	3.35	3.35
schooling	Fixed distance transect	50	4	2	0.3	1.35	1.05	3.5	3.5
schooling	Fixed distance transect	50	4	2	0.3	2.15	1.85	6.16667	6.16667
schooling	Fixed distance transect	50	4	2	0.3	1.31	1.01	3.36667	3.36667
schooling	Fixed distance transect	50	4	4	0.3	0.705	0.405	1.35	1.35
schooling	Fixed distance transect	50	4	4	0.3	0.875	0.575	1.91667	1.91667
schooling	Fixed distance transect	50	4	4	0.3	0.775	0.475	1.58333	1.58333
schooling	Fixed distance transect	50	4	4	0.3	0.885	0.585	1.95	1.95
schooling	Fixed distance transect	50	4	4	0.3	0.745	0.445	1.48333	1.48333
schooling	Fixed distance transect	50	4	4	0.3	0.605	0.305	1.01667	1.01667
schooling	Fixed distance transect	50	4	4	0.3	0.54	0.24	0.8	0.8
schooling	Fixed distance transect	50	4	4	0.3	0.75	0.45	1.5	1.5
schooling	Fixed distance transect	50	4	4	0.3	1.005	0.705	2.35	2.35
schooling	Fixed distance transect	50	4	4	0.3	0.565	0.265	0.883333	0.883333
schooling	Fixed distance transect	50	4	6	0.3	0.74	0.44	1.46667	1.46667
schooling	Fixed distance transect	50	4	6	0.3	0.71	0.41	1.36667	1.36667
schooling	Fixed distance transect	50	4	6	0.3	0.67	0.37	1.23333	1.23333
schooling	Fixed distance transect	50	4	6	0.3	0.785	0.485	1.61667	1.61667
schooling	Fixed distance transect	50	4	6	0.3	0.845	0.545	1.81667	1.81667
schooling	Fixed distance transect	50	4	6	0.3	0.7	0.4	1.33333	1.33333
schooling	Fixed distance transect	50	4	6	0.3	0.665	0.365	1.21667	1.21667
schooling	Fixed distance transect	50	4	6	0.3	0.64	0.34	1.13333	1.13333
schooling	Fixed distance transect	50	4	6	0.3	0.675	0.375	1.25	1.25
schooling	Fixed distance transect	50	4	6	0.3	0.625	0.325	1.08333	1.08333
schooling	Fixed distance transect	50	4	8	0.3	0.48	0.18	0.6	0.6
schooling	Fixed distance transect	50	4	8	0.3	0.76	0.46	1.53333	1.53333
schooling	Fixed distance transect	50	4	8	0.3	0.54	0.24	0.8	0.8
schooling	Fixed distance transect	50	4	8	0.3	0.485	0.185	0.616667	0.616667
schooling	Fixed distance transect	50	4	8	0.3	0.655	0.355	1.18333	1.18333
schooling	Fixed distance transect	50	4	8	0.3	0.53	0.23	0.766667	0.766667
schooling	Fixed distance transect	50	4	8	0.3	0.56	0.26	0.866667	0.866667
schooling	Fixed distance transect	50	4	8	0.3	0.58	0.28	0.933333	0.933333
schooling	Fixed distance transect	50	4	8	0.3	0.41	0.11	0.366667	0.366667
schooling	Fixed distance transect	50	4	8	0.3	0.51	0.21	0.7	0.7
schooling	Fixed distance transect	50	4	10	0.3	0.51	0.21	0.7	0.7
schooling	Fixed distance transect	50	4	10	0.3	0.405	0.105	0.35	0.35
schooling	Fixed distance transect	50	4	10	0.3	0.48	0.18	0.6	0.6
schooling	Fixed distance transect	50	4	10	0.3	0.49	0.19	0.633333	0.633333
schooling	Fixed distance transect	50	4	10	0.3	0.57	0.27	0.9	0.9
schooling	Fixed distance transect	50	4	10	0.3	0.48	0.18	0.6	0.6
schooling	Fixed distance transect	50	4	10	0.3	0.505	0.205	0.683333	0.683333
schooling	Fixed distance transect	50	4	10	0.3	0.425	0.125	0.416667	0.416667
schooling	Fixed distance transect	50	4	10	0.3	0.39	0.09	0.3	0.3
schooling	Fixed distance transect	50	4	10	0.3	0.6	0.3	1	1
schooling	Fixed distance transect	50	5	2	0.3	1.404	1.104	3.68	3.68
schooling	Fixed distance transect	50	5	2	0.3	1.176	0.876	2.92	2.92
schooling	Fixed distance transect	50	5	2	0.3	1.316	1.016	3.38667	3.38667
schooling	Fixed distance transect	50	5	2	0.3	1.416	1.116	3.72	3.72
schooling	Fixed distance transect	50	5	2	0.3	1.54	1.24	4.13333	4.13333
schooling	Fixed distance transect	50	5	2	0.3	1.22	0.92	3.06667	3.06667
schooling	Fixed distance transect	50	5	2	0.3	1.284	0.984	3.28	3.28
schooling	Fixed distance transect	50	5	2	0.3	1.532	1.232	4.10667	4.10667
schooling	Fixed distance transect	50	5	2	0.3	1.38	1.08	3.6	3.6
schooling	Fixed distance transect	50	5	2	0.3	1.484	1.184	3.94667	3.94667
schooling	Fixed distance transect	50	5	4	0.3	0.796	0.496	1.65333	1.65333
schooling	Fixed distance transect	50	5	4	0.3	0.86	0.56	1.86667	1.86667
schooling	Fixed distance transect	50	5	4	0.3	0.884	0.584	1.94667	1.94667
schooling	Fixed distance transect	50	5	4	0.3	0.768	0.468	1.56	1.56
schooling	Fixed distance transect	50	5	4	0.3	0.788	0.488	1.62667	1.62667
schooling	Fixed distance transect	50	5	4	0.3	0.752	0.452	1.50667	1.50667
schooling	Fixed distance transect	50	5	4	0.3	0.608	0.308	1.02667	1.02667
schooling	Fixed distance transect	50	5	4	0.3	0.84	0.54	1.8	1.8
schooling	Fixed distance transect	50	5	4	0.3	0.696	0.396	1.32	1.32
schooling	Fixed distance transect	50	5	4	0.3	0.592	0.292	0.973333	0.973333
schooling	Fixed distance transect	50	5	6	0.3	0.648	0.348	1.16	1.16
schooling	Fixed distance transect	50	5	6	0.3	0.548	0.248	0.826667	0.826667
schooling	Fixed distance transect	50	5	6	0.3	0.34	0.04	0.133333	0.133333
schooling	Fixed distance transect	50	5	6	0.3	0.572	0.272	0.906667	0.906667
schooling	Fixed distance transect	50	5	6	0.3	0.512	0.212	0.706667	0.706667
schooling	Fixed distance transect	50	5	6	0.3	0.744	0.444	1.48	1.48
schooling	Fixed distance transect	50	5	6	0.3	0.724	0.424	1.41333	1.41333
schooling	Fixed distance transect	50	5	6	0.3	0.652	0.352	1.17333	1.17333
schooling	Fixed distance transect	50	5	6	0.3	0.576	0.276	0.92	0.92
schooling	Fixed distance transect	50	5	6	0.3	0.712	0.412	1.37333	1.37333
schooling	Fixed distance transect	50	5	8	0.3	0.54	0.24	0.8	0.8
schooling	Fixed distance transect	50	5	8	0.3	0.44	0.14	0.466667	0.466667
schooling	Fixed distance transect	50	5	8	0.3	0.372	0.072	0.24	0.24
schooling	Fixed distance transect	50	5	8	0.3	0.5	0.2	0.666667	0.666667
schooling	Fixed distance transect	50	5	8	0.3	0.584	0.284	0.946667	0.946667
schooling	Fixed distance transect	50	5	8	0.3	0.392	0.092	0.306667	0.306667
schooling	Fixed distance transect	50	5	8	0.3	0.52	0.22	0.733333	0.733333
schooling	Fixed distance transect	50	5	8	0.3	0.52	0.22	0.733333	0.733333
schooling	Fixed distance transect	50	5	8	0.3	0.58	0.28	0.933333	0.933333
schooling	Fixed distance transect	50	5	8	0.3	0.62	0.32	1.06667	1.06667
schooling	Fixed distance transect	50	5	10	0.3	0.42	0.12	0.4	0.4
schooling	Fixed distance transect	50	5	10	0.3	0.328	0.028	0.0933333	0.0933333
schooling	Fixed distance transect	50	5	10	0.3	0.48	0.18	0.6	0.6
schooling	Fixed distance transect	50	5	10	0.3	0.388	0.088	0.293333	0.293333
schooling	Fixed distance transect	50	5	10	0.3	0.412	0.112	0.373333	0.373333
schooling	Fixed distance transect	50	5	10	0.3	0.44	0.14	0.466667	0.466667
schooling	Fixed distance transect	50	5	10	0.3	0.432	0.132	0.44	0.44
schooling	Fixed distance transect	50	5	10	0.3	0.428	0.128	0.426667	0.426667
schooling	Fixed distance transect	50	5	10	0.3	0.476	0.176	0.586667	0.586667
schooling	Fixed distance transect	50	5	10	0.3	0.56	0.26	0.866667	0.866667
cryptic	Fixed distance transect	10	1	2	0.3	0.4	0.1	0.333333	0.333333
cryptic	Fixed distance transect	10	1	2	0.3	0.6	0.3	1	1
cryptic	Fixed distance transect	10	1	2	0.3	0.1	-0.2	-0.666667	0.666667
cryptic	Fixed distance transect	10	1	2	0.3	0.3	0	0	0
cryptic	Fixed distance transect	10	1	2	0.3	0.3	0	0	0
cryptic	Fixed distance transect	10	1	2	0.3	0.2	-0.1	-0.333333	0.333333
cryptic	Fixed distance transect	10	1	2	0.3	0.6	0.3	1	1
cryptic	Fixed distance transect	10	1	2	0.3	0.2	-0.1	-0.333333	0.333333
cryptic	Fixed distance transect	10	1	2	0.3	0.5	0.2	0.666667	0.666667
cryptic	Fixed distance transect	10	1	2	0.3	0.4	0.1	0.333333	0.333333
cryptic	Fixed distance transect	10	1	4	0.3	0.2	-0.1	-0.333333	0.333333
cryptic	Fixed distance transect	10	1	4	0.3	0.3	0	0	0
cryptic	Fixed distance transect	10	1	4	0.3	0.1	-0.2	-0.666667	0.666667
cryptic	Fixed distance transect	10	1	4	0.3	0.1	-0.2	-0.666667	0.666667
cryptic	Fixed distance transect	10	1	4	0.3	0.4	0.1	0.333333	0.333333
cryptic	Fixed distance transect	10	1	4	0.3	0.2	-0.1	-0.333333	0.333333
cryptic	Fixed distance transect	10	1	4	0.3	0	-0.3	-1	1
cryptic	Fixed distance transect	10	1	4	0.3	0.4	0.1	0.333333	0.333333
cryptic	Fixed distance transect	10	1	4	0.3	0.2	-0.1	-0.333333	0.333333
cryptic	Fixed distance transect	10	1	4	0.3	0.4	0.1	0.333333	0.333333
cryptic	Fixed distance transect	10	1	6	0.3	0.2	-0.1	-0.333333	0.333333
cryptic	Fixed distance transect	10	1	6	0.3	0.2	-0.1	-0.333333	0.333333
cryptic	Fixed distance transect	10	1	6	0.3	0.1	-0.2	-0.666667	0.666667
cryptic	Fixed distance transect	10	1	6	0.3	0.1	-0.2	-0.666667	0.666667
cryptic	Fixed distance transect	10	1	6	0.3	0.1	-0.2	-0.666667	0.666667
cryptic	Fixed distance transect	10	1	6	0.3	0.3	0	0	0
cryptic	Fixed distance transect	10	1	6	0.3	0.1	-0.2	-0.666667	0.666667
cryptic	Fixed distance transect	10	1	6	0.3	0.3	0	0	0
cryptic	Fixed distance transect	10	1	6	0.3	0.1	-0.2	-0.666667	0.666667
cryptic	Fixed distance transect	10	1	6	0.3	0.2	-0.1	-0.333333	0.333333
cryptic	Fixed distance transect	10	1	8	0.3	0.4	0.1	0.333333	0.333333
cryptic	Fixed distance transect	10	1	8	0.3	0.4	0.1	0.333333	0.333333
cryptic	Fixed distance transect	10	1	8	0.3	0.2	-0.1	-0.333333	0.333333
cryptic	Fixed distance transect	10	1	8	0.3	0.2	-0.1	-0.333333	0.333333
cryptic	Fixed distance transect	10	1	8	0.3	0.2	-0.1	-0.333333	0.333333
cryptic	Fixed distance transect	10	1	8	0.3	0	-0.3	-1	1
cryptic	Fixed distance transect	10	1	8	0.3	0.1	-0.2	-0.666667	0.666667
cryptic	Fixed distance transect	10	1	8	0.3	0	-0.3	-1	1
cryptic	Fixed distance transect	10	1	8	0.3	0.4	0.1	0.333333	0.333333
cryptic	Fixed distance transect	10	1	8	0.3	0.2	-0.1	-0.333333	0.333333
cryptic	Fixed distance transect	10	1	10	0.3	0.2	-0.1	-0.333333	0.333333
cryptic	Fixed distance transect	10	1	10	0.3	0.3	0	0	0
cryptic	Fixed distance transect	10	1	10	0.3	0.1	-0.2	-0.666667	0.666667
cryptic	Fixed distance transect	10	1	10	0.3	0.1	-0.2	-0.666667	0.666667
cryptic	Fixed distance transect	10	1	10	0.3	0.2	-0.1	-0.333333	0.333333
cryptic	Fixed distance transect	10	1	10	0.3	0.1	-0.2	-0.666667	0.666667
cryptic	Fixed distance transect	10	1	10	0.3	0	-0.3	-1	1
cryptic	Fixed distance transect	10	1	10	0.3	0.3	0	0	0
cryptic	Fixed distance transect	10	1	10	0.3	0.5	0.2	0.666667	0.666667
cryptic	Fixed distance transect	10	1	10	0.3	0.2	-0.1	-0.333333	0.333333
cryptic	Fixed distance transect	10	2	2	0.3	0.25	-0.05	-0.166667	0.166667
cryptic	Fixed distance transect	10	2	2	0.3	0.4	0.1	0.333333	0.333333
cryptic	Fixed distance transect	10	2	2	0.3	0.45	0.15	0.5	0.5
cryptic	Fixed distance transect	10	2	2	0.3	0.4	0.1	0.333333	0.333333
cryptic	Fixed distance transect	10	2	2	0.3	0.3	0	0	0
cryptic	Fixed distance transect	10	2	2	0.3	0.5	0.2	0.666667	0.666667
cryptic	Fixed distance transect	10	2	2	0.3	0.25	-0.05	-0.166667	0.166667
cryptic	Fixed distance transect	10	2	2	0.3	0.35	0.05	0.166667	0.166667
cryptic	Fixed distance transect	10	2	2	0.3	0.25	-0.05	-0.166667	0.166667
cryptic	Fixed distance transect	10	2	2	0.3	0.35	0.05	0.166667	0.166667
cryptic	Fixed distance transect	10	2	4	0.3	0.25	-0.05	-0.166667	0.166667
cryptic	Fixed distance transect	10	2	4	0.3	0.2	-0.1	-0.333333	0.333333
cryptic	Fixed distance transect	10	2	4	0.3	0.4	0.1	0.333333	0.333333
cryptic	Fixed distance transect	10	2	4	0.3	0.25	-0.05	-0.166667	0.166667
cryptic	Fixed distance transect	10	2	4	0.3	0.3	0	0	0
cryptic	Fixed distance transect	10	2	4	0.3	0.4	0.1	0.333333	0.333333
cryptic	Fixed distance transect	10	2	4	0.3	0.15	-0.15	-0.5	0.5
cryptic	Fixed distance transect	10	2	4	0.3	0.1	-0.2	-0.666667	0.666667
cryptic	Fixed distance transect	10	2	4	0.3	0.25	-0.05	-0.166667	0.166667
cryptic	Fixed distance transect	10	2	4	0.3	0.25	-0.05	-0.166667	0.166667
cryptic	Fixed distance transect	10	2	6	0.3	0.3	0	0	0
cryptic	Fixed distance transect	10	2	6	0.3	0.2	-0.1	-0.333333	0.333333
cryptic	Fixed distance transect	10	2	6	0.3	0.15	-0.15	-0.5	0.5
cryptic	Fixed distance transect	10	2	6	0.3	0.15	-0.15	-0.5	0.5
cryptic	Fixed distance transect	10	2	6	0.3	0	-0.3	-1	1
cryptic	Fixed distance transect	10	2	6	0.3	0.25	-0.05	-0.166667	0.166667
cryptic	Fixed distance transect	10	2	6	0.3	0.15	-0.15	-0.5	0.5
cryptic	Fixed distance transect	10	2	6	0.3	0.2	-0.1	-0.333333	0.333333
cryptic	Fixed distance transect	10	2	6	0.3	0.35	0.05	0.166667	0.166667
cryptic	Fixed distance transect	10	2	6	0.3	0.3	0	0	0
cryptic	Fixed distance transect	10	2	8	0.3	0.15	-0.15	-0.5	0.5
cryptic	Fixed distance transect	10	2	8	0.3	0.45	0.15	0.5	0.5
cryptic	Fixed distance transect	10	2	8	0.3	0.3	0	0	0
cryptic	Fixed distance transect	10	2	8	0.3	0.1	-0.2	-0.666667	0.666667
cryptic	Fixed distance transect	10	2	8	0.3	0.35	0.05	0.166667	0.166667
cryptic	Fixed distance transect	10	2	8	0.3	0.05	-0.25	-0.833333	0.833333
cryptic	Fixed distance transect	10	2	8	0.3	0.05	-0.25	-0.833333	0.833333
cryptic	Fixed distance transect	10	2	8	0.3	0.35	0.05	0.166667	0.166667
cryptic	Fixed distance transect	10	2	8	0.3	0.3	0	0	0
cryptic	Fixed distance transect	10	2	8	0.3	0.3	0	0	0
cryptic	Fixed distance transect	10	2	10	0.3	0.15	-0.15	-0.5	0.5
cryptic	Fixed distance transect	10	2	10	0.3	0.05	-0.25	-0.833333	0.833333
cryptic	Fixed distance transect	10	2	10	0.3	0	-0.3	-1	1
cryptic	Fixed distance transect	10	2	10	0.3	0.15	-0.15	-0.5	0.5
cryptic	Fixed distance transect	10	2	10	0.3	0.15	-0.15	-0.5	0.5
cryptic	Fixed distance transect	10	2	10	0.3	0.2	-0.1	-0.333333	0.333333
cryptic	Fixed distance transect	10	2	10	0.3	0.4	0.1	0.333333	0.333333
cryptic	Fixed distance transect	10	2	10	0.3	0.15	-0.15	-0.5	0.5
cryptic	Fixed distance transect	10	2	10	0.3	0.2	-0.1	-0.333333	0.333333
cryptic	Fixed distance transect	10	2	10	0.3	0.1	-0.2	-0.666667	0.666667
cryptic	Fixed distance transect	10	3	2	0.3	0.167	-0.133	-0.443333	0.443333
cryptic	Fixed distance transect	10	3	2	0.3	0.1	-0.2	-0.666667	0.666667
cryptic	Fixed distance transect	10	3	2	0.3	0.167	-0.133	-0.443333	0.443333
cryptic	Fixed distance transect	10	3	2	0.3	0.333	0.033	0.11	0.11
cryptic	Fixed distance transect	10	3	2	0.3	0.233	-0.067	-0.223333	0.223333
cryptic	Fixed distance transect	10	3	2	0.3	0.167	-0.133	-0.443333	0.443333
cryptic	Fixed distance transect	10	3	2	0.3	0.333	0.033	0.11	0.11
cryptic	Fixed distance transect	10	3	2	0.3	0.3	0	0	0
cryptic	Fixed distance transect	10	3	2	0.3	0.267	-0.033	-0.11	0.11
cryptic	Fixed distance transect	10	3	2	0.3	0.2	-0.1	-0.333333	0.333333
cryptic	Fixed distance transect	10	3	4	0.3	0.133	-0.167	-0.556667	0.556667
cryptic	Fixed distance transect	10	3	4	0.3	0.2	-0.1	-0.333333	0.333333
cryptic	Fixed distance transect	10	3	4	0.3	0.167	-0.133	-0.443333	0.443333
cryptic	Fixed distance transect	10	3	4	0.3	0.033	-0.267	-0.89	0.89
cryptic	Fixed distance transect	10	3	4	0.3	0.167	-0.133	-0.443333	0.443333
cryptic	Fixed distance transect	10	3	4	0.3	0.133	-0.167	-0.556667	0.556667
cryptic	Fixed distance transect	10	3	4	0.3	0.133	-0.167	-0.556667	0.556667
cryptic	Fixed distance transect	10	3	4	0.3	0.133	-0.167	-0.556667	0.556667
cryptic	Fixed distance transect	10	3	4	0.3	0.167	-0.133	-0.443333	0.443333
cryptic	Fixed distance transect	10	3	4	0.3	0.2	-0.1	-0.333333	0.333333
cryptic	Fixed distance transect	10	3	6	0.3	0.1	-0.2	-0.666667	0.666667
cryptic	Fixed distance transect	10	3	6	0.3	0.333	0.033	0.11	0.11
cryptic	Fixed distance transect	10	3	6	0.3	0.033	-0.267	-0.89	0.89
cryptic	Fixed distance transect	10	3	6	0.3	0.133	-0.167	-0.556667	0.556667
cryptic	Fixed distance transect	10	3	6	0.3	0.133	-0.167	-0.556667	0.556667
cryptic	Fixed distance transect	10	3	6	0.3	0.1	-0.2	-0.666667	0.666667
cryptic	Fixed distance transect	10	3	6	0.3	0.133	-0.167	-0.556667	0.556667
cryptic	Fixed distance transect	10	3	6	0.3	0.1	-0.2	-0.666667	0.666667
cryptic	Fixed distance transect	10	3	6	0.3	0.233	-0.067	-0.223333	0.223333
cryptic	Fixed distance transect	10	3	6	0.3	0.167	-0.133	-0.443333	0.443333
cryptic	Fixed distance transect	10	3	8	0.3	0.133	-0.167	-0.556667	0.556667
cryptic	Fixed distance transect	10	3	8	0.3	0.367	0.067	0.223333	0.223333
cryptic	Fixed distance transect	10	3	8	0.3	0.067	-0.233	-0.776667	0.776667
cryptic	Fixed distance transect	10	3	8	0.3	0.167	-0.133	-0.443333	0.443333
cryptic	Fixed distance transect	10	3	8	0.3	0.3	0	0	0
cryptic	Fixed distance transect	10	3	8	0.3	0.1	-0.2	-0.666667	0.666667
cryptic	Fixed distance transect	10	3	8	0.3	0.2	-0.1	-0.333333	0.333333
cryptic	Fixed distance transect	10	3	8	0.3	0.067	-0.233	-0.776667	0.776667
cryptic	Fixed distance transect	10	3	8	0.3	0.033	-0.267	-0.89	0.89
cryptic	Fixed distance transect	10	3	8	0.3	0.1	-0.2	-0.666667	0.666667
cryptic	Fixed distance transect	10	3	10	0.3	0.2	-0.1	-0.333333	0.333333
cryptic	Fixed distance transect	10	3	10	0.3	0.167	-0.133	-0.443333	0.443333
cryptic	Fixed distance transect	10	3	10	0.3	0.167	-0.133	-0.443333	0.443333
cryptic	Fixed distance transect	10	3	10	0.3	0.1	-0.2	-0.666667	0.666667
cryptic	Fixed distance transect	10	3	10	0.3	0.067	-0.233	-0.776667	0.776667
cryptic	Fixed distance transect	10	3	10	0.3	0.1	-0.2	-0.666667	0.666667
cryptic	Fixed distance transect	10	3	10	0.3	0.1	-0.2	-0.666667	0.666667
cryptic	Fixed distance transect	10	3	10	0.3	0.2	-0.1	-0.333333	0.333333
cryptic	Fixed distance transect	10	3	10	0.3	0.1	-0.2	-0.666667	0.666667
cryptic	Fixed distance transect	10	3	10	0.3	0.267	-0.033	-0.11	0.11
cryptic	Fixed distance transect	10	4	2	0.3	0.25	-0.05	-0.166667	0.166667
cryptic	Fixed distance transect	10	4	2	0.3	0.275	-0.025	-0.0833333	0.0833333
cryptic	Fixed distance transect	10	4	2	0.3	0.05	-0.25	-0.833333	0.833333
cryptic	Fixed distance transect	10	4	2	0.3	0.175	-0.125	-0.416667	0.416667
cryptic	Fixed distance transect	10	4	2	0.3	0.25	-0.05	-0.166667	0.166667
cryptic	Fixed distance transect	10	4	2	0.3	0.25	-0.05	-0.166667	0.166667
cryptic	Fixed distance transect	10	4	2	0.3	0.125	-0.175	-0.583333	0.583333
cryptic	Fixed distance transect	10	4	2	0.3	0.15	-0.15	-0.5	0.5
cryptic	Fixed distance transect	10	4	2	0.3	0.1	-0.2	-0.666667	0.666667
cryptic	Fixed distance transect	10	4	2	0.3	0.075	-0.225	-0.75	0.75
cryptic	Fixed distance transect	10	4	4	0.3	0.1	-0.2	-0.666667	0.666667
cryptic	Fixed distance transect	10	4	4	0.3	0.1	-0.2	-0.666667	0.666667
cryptic	Fixed distance transect	10	4	4	0.3	0.075	-0.225	-0.75	0.75
cryptic	Fixed distance transect	10	4	4	0.3	0.125	-0.175	-0.583333	0.583333
cryptic	Fixed distance transect	10	4	4	0.3	0.15	-0.15	-0.5	0.5
cryptic	Fixed distance transect	10	4	4	0.3	0.125	-0.175	-0.583333	0.583333
cryptic	Fixed distance transect	10	4	4	0.3	0.175	-0.125	-0.416667	0.416667
cryptic	Fixed distance transect	10	4	4	0.3	0.15	-0.15	-0.5	0.5
cryptic	Fixed distance transect	10	4	4	0.3	0.2	-0.1	-0.333333	0.333333
cryptic	Fixed distance transect	10	4	4	0.3	0.15	-0.15	-0.5	0.5
cryptic	Fixed distance transect	10	4	6	0.3	0.075	-0.225	-0.75	0.75
cryptic	Fixed distance transect	10	4	6	0.3	0.05	-0.25	-0.833333	0.833333
cryptic	Fixed distance transect	10	4	6	0.3	0.125	-0.175	-0.583333	0.583333
cryptic	Fixed distance transect	10	4	6	0.3	0.2	-0.1	-0.333333	0.333333
cryptic	Fixed distance transect	10	4	6	0.3	0.1	-0.2	-0.666667	0.666667
cryptic	Fixed distance transect	10	4	6	0.3	0.2	-0.1	-0.333333	0.333333
cryptic	Fixed distance transect	10	4	6	0.3	0.075	-0.225	-0.75	0.75
cryptic	Fixed distance transect	10	4	6	0.3	0.075	-0.225	-0.75	0.75
cryptic	Fixed distance transect	10	4	6	0.3	0.075	-0.225	-0.75	0.75
cryptic	Fixed distance transect	10	4	6	0.3	0.225	-0.075	-0.25	0.25
cryptic	Fixed distance transect	10	4	8	0.3	0.15	-0.15	-0.5	0.5
cryptic	Fixed distance transect	10	4	8	0.3	0.075	-0.225	-0.75	0.75
cryptic	Fixed distance transect	10	4	8	0.3	0.125	-0.175	-0.583333	0.583333
cryptic	Fixed distance transect	10	4	8	0.3	0.05	-0.25	-0.833333	0.833333
cryptic	Fixed distance transect	10	4	8	0.3	0.125	-0.175	-0.583333	0.583333
cryptic	Fixed distance transect	10	4	8	0.3	0.1	-0.2	-0.666667	0.666667
cryptic	Fixed distance transect	10	4	8	0.3	0.075	-0.225	-0.75	0.75
cryptic	Fixed distance transect	10	4	8	0.3	0.025	-0.275	-0.916667	0.916667
cryptic	Fixed distance transect	10	4	8	0.3	0.1	-0.2	-0.666667	0.666667
cryptic	Fixed distance transect	10	4	8	0.3	0.125	-0.175	-0.583333	0.583333
cryptic	Fixed distance transect	10	4	10	0.3	0.15	-0.15	-0.5	0.5
cryptic	Fixed distance transect	10	4	10	0.3	0.1	-0.2	-0.666667	0.666667
cryptic	Fixed distance transect	10	4	10	0.3	0.075	-0.225	-0.75	0.75
cryptic	Fixed distance transect	10	4	10	0.3	0.175	-0.125	-0.416667	0.416667
cryptic	Fixed distance transect	10	4	10	0.3	0.1	-0.2	-0.666667	0.666667
cryptic	Fixed distance transect	10	4	10	0.3	0.075	-0.225	-0.75	0.75
cryptic	Fixed distance transect	10	4	10	0.3	0.05	-0.25	-0.833333	0.833333
cryptic	Fixed distance transect	10	4	10	0.3	0.125	-0.175	-0.583333	0.583333
cryptic	Fixed distance transect	10	4	10	0.3	0.125	-0.175	-0.583333	0.583333
cryptic	Fixed distance transect	10	4	10	0.3	0.05	-0.25	-0.833333	0.833333
cryptic	Fixed distance transect	10	5	2	0.3	0.12	-0.18	-0.6	0.6
cryptic	Fixed distance transect	10	5	2	0.3	0.08	-0.22	-0.733333	0.733333
cryptic	Fixed distance transect	10	5	2	0.3	0.12	-0.18	-0.6	0.6
cryptic	Fixed distance transect	10	5	2	0.3	0.14	-0.16	-0.533333	0.533333
cryptic	Fixed distance transect	10	5	2	0.3	0.18	-0.12	-0.4	0.4
cryptic	Fixed distance transect	10	5	2	0.3	0.1	-0.2	-0.666667	0.666667
cryptic	Fixed distance transect	10	5	2	0.3	0.14	-0.16	-0.533333	0.533333
cryptic	Fixed distance transect	10	5	2	0.3	0.3	0	0	0
cryptic	Fixed distance transect	10	5	2	0.3	0.16	-0.14	-0.466667	0.466667
cryptic	Fixed distance transect	10	5	2	0.3	0.08	-0.22	-0.733333	0.733333
cryptic	Fixed distance transect	10	5	4	0.3	0.14	-0.16	-0.533333	0.533333
cryptic	Fixed distance transect	10	5	4	0.3	0.12	-0.18	-0.6	0.6
cryptic	Fixed distance transect	10	5	4	0.3	0.02	-0.28	-0.933333	0.933333
cryptic	Fixed distance transect	10	5	4	0.3	0.16	-0.14	-0.466667	0.466667
cryptic	Fixed distance transect	10	5	4	0.3	0.14	-0.16	-0.533333	0.533333
cryptic	Fixed distance transect	10	5	4	0.3	0.04	-0.26	-0.866667	0.866667
cryptic	Fixed distance transect	10	5	4	0.3	0.1	-0.2	-0.666667	0.666667
cryptic	Fixed distance transect	10	5	4	0.3	0.02	-0.28	-0.933333	0.933333
cryptic	Fixed distance transect	10	5	4	0.3	0.12	-0.18	-0.6	0.6
cryptic	Fixed distance transect	10	5	4	0.3	0.12	-0.18	-0.6	0.6
cryptic	Fixed distance transect	10	5	6	0.3	0.14	-0.16	-0.533333	0.533333
cryptic	Fixed distance transect	10	5	6	0.3	0.12	-0.18	-0.6	0.6
cryptic	Fixed distance transect	10	5	6	0.3	0.12	-0.18	-0.6	0.6
cryptic	Fixed distance transect	10	5	6	0.3	0.04	-0.26	-0.866667	0.866667
cryptic	Fixed distance transect	10	5	6	0.3	0.02	-0.28	-0.933333	0.933333
cryptic	Fixed distance transect	10	5	6	0.3	0.18	-0.12	-0.4	0.4
cryptic	Fixed distance transect	10	5	6	0.3	0.12	-0.18	-0.6	0.6
cryptic	Fixed distance transect	10	5	6	0.3	0.06	-0.24	-0.8	0.8
cryptic	Fixed distance transect	10	5	6	0.3	0.08	-0.22	-0.733333	0.733333
cryptic	Fixed distance transect	10	5	6	0.3	0.12	-0.18	-0.6	0.6
cryptic	Fixed distance transect	10	5	8	0.3	0.12	-0.18	-0.6	0.6
cryptic	Fixed distance transect	10	5	8	0.3	0.08	-0.22	-0.733333	0.733333
cryptic	Fixed distance transect	10	5	8	0.3	0.12	-0.18	-0.6	0.6
cryptic	Fixed distance transect	10	5	8	0.3	0.12	-0.18	-0.6	0.6
cryptic	Fixed distance transect	10	5	8	0.3	0.04	-0.26	-0.866667	0.866667
cryptic	Fixed distance transect	10	5	8	0.3	0.12	-0.18	-0.6	0.6
cryptic	Fixed distance transect	10	5	8	0.3	0.04	-0.26	-0.866667	0.866667
cryptic	Fixed distance transect	10	5	8	0.3	0.04	-0.26	-0.866667	0.866667
cryptic	Fixed distance transect	10	5	8	0.3	0.12	-0.18	-0.6	0.6
cryptic	Fixed distance transect	10	5	8	0.3	0.06	-0.24	-0.8	0.8
cryptic	Fixed distance transect	10	5	10	0.3	0.16	-0.14	-0.466667	0.466667
cryptic	Fixed distance transect	10	5	10	0.3	0.06	-0.24	-0.8	0.8
cryptic	Fixed distance transect	10	5	10	0.3	0.08	-0.22	-0.733333	0.733333
cryptic	Fixed distance transect	10	5	10	0.3	0.08	-0.22	-0.733333	0.733333
cryptic	Fixed distance transect	10	5	10	0.3	0.04	-0.26	-0.866667	0.866667
cryptic	Fixed distance transect	10	5	10	0.3	0.1	-0.2	-0.666667	0.666667
cryptic	Fixed distance transect	10	5	10	0.3	0.14	-0.16	-0.533333	0.533333
cryptic	Fixed distance transect	10	5	10	0.3	0.06	-0.24	-0.8	0.8
cryptic	Fixed distance transect	10	5	10	0.3	0.02	-0.28	-0.933333	0.933333
cryptic	Fixed distance transect	10	5	10	0.3	0.08	-0.22	-0.733333	0.733333
cryptic	Fixed distance transect	20	1	2	0.3	0.3	0	0	0
cryptic	Fixed distance transect	20	1	2	0.3	0.35	0.05	0.166667	0.166667
cryptic	Fixed distance transect	20	1	2	0.3	0.7	0.4	1.33333	1.33333
cryptic	Fixed distance transect	20	1	2	0.3	0.4	0.1	0.333333	0.333333
cryptic	Fixed distance transect	20	1	2	0.3	0.45	0.15	0.5	0.5
cryptic	Fixed distance transect	20	1	2	0.3	0.35	0.05	0.166667	0.166667
cryptic	Fixed distance transect	20	1	2	0.3	0.05	-0.25	-0.833333	0.833333
cryptic	Fixed distance transect	20	1	2	0.3	0.3	0	0	0
cryptic	Fixed distance transect	20	1	2	0.3	0.4	0.1	0.333333	0.333333
cryptic	Fixed distance transect	20	1	2	0.3	0.2	-0.1	-0.333333	0.333333
cryptic	Fixed distance transect	20	1	4	0.3	0.3	0	0	0
cryptic	Fixed distance transect	20	1	4	0.3	0.15	-0.15	-0.5	0.5
cryptic	Fixed distance transect	20	1	4	0.3	0.3	0	0	0
cryptic	Fixed distance transect	20	1	4	0.3	0.3	0	0	0
cryptic	Fixed distance transect	20	1	4	0.3	0.55	0.25	0.833333	0.833333
cryptic	Fixed distance transect	20	1	4	0.3	0.2	-0.1	-0.333333	0.333333
cryptic	Fixed distance transect	20	1	4	0.3	0.7	0.4	1.33333	1.33333
cryptic	Fixed distance transect	20	1	4	0.3	0.05	-0.25	-0.833333	0.833333
cryptic	Fixed distance transect	20	1	4	0.3	0.1	-0.2	-0.666667	0.666667
cryptic	Fixed distance transect	20	1	4	0.3	0.2	-0.1	-0.333333	0.333333
cryptic	Fixed distance transect	20	1	6	0.3	0.3	0	0	0
cryptic	Fixed distance transect	20	1	6	0.3	0.25	-0.05	-0.166667	0.166667
cryptic	Fixed distance transect	20	1	6	0.3	0.3	0	0	0
cryptic	Fixed distance transect	20	1	6	0.3	0.3	0	0	0
cryptic	Fixed distance transect	20	1	6	0.3	0.3	0	0	0
cryptic	Fixed distance transect	20	1	6	0.3	0.6	0.3	1	1
cryptic	Fixed distance transect	20	1	6	0.3	0.15	-0.15	-0.5	0.5
cryptic	Fixed distance transect	20	1	6	0.3	0.25	-0.05	-0.166667	0.166667
cryptic	Fixed distance transect	20	1	6	0.3	0.2	-0.1	-0.333333	0.333333
cryptic	Fixed distance transect	20	1	6	0.3	0.2	-0.1	-0.333333	0.333333
cryptic	Fixed distance transect	20	1	8	0.3	0.4	0.1	0.333333	0.333333
cryptic	Fixed distance transect	20	1	8	0.3	0.15	-0.15	-0.5	0.5
cryptic	Fixed distance transect	20	1	8	0.3	0.1	-0.2	-0.666667	0.666667
cryptic	Fixed distance transect	20	1	8	0.3	0.25	-0.05	-0.166667	0.166667
cryptic	Fixed distance transect	20	1	8	0.3	0.1	-0.2	-0.666667	0.666667
cryptic	Fixed distance transect	20	1	8	0.3	0.15	-0.15	-0.5	0.5
cryptic	Fixed distance transect	20	1	8	0.3	0.3	0	0	0
cryptic	Fixed distance transect	20	1	8	0.3	0.15	-0.15	-0.5	0.5
cryptic	Fixed distance transect	20	1	8	0.3	0.15	-0.15	-0.5	0.5
cryptic	Fixed distance transect	20	1	8	0.3	0.2	-0.1	-0.333333	0.333333
cryptic	Fixed distance transect	20	1	10	0.3	0.2	-0.1	-0.333333	0.333333
cryptic	Fixed distance transect	20	1	10	0.3	0.15	-0.15	-0.5	0.5
cryptic	Fixed distance transect	20	1	10	0.3	0.3	0	0	0
cryptic	Fixed distance transect	20	1	10	0.3	0.25	-0.05	-0.166667	0.166667
cryptic	Fixed distance transect	20	1	10	0.3	0.2	-0.1	-0.333333	0.333333
cryptic	Fixed distance transect	20	1	10	0.3	0.15	-0.15	-0.5	0.5
cryptic	Fixed distance transect	20	1	10	0.3	0.25	-0.05	-0.166667	0.166667
cryptic	Fixed distance transect	20	1	10	0.3	0.25	-0.05	-0.166667	0.166667
cryptic	Fixed distance transect	20	1	10	0.3	0.3	0	0	0
cryptic	Fixed distance transect	20	1	10	0.3	0.05	-0.25	-0.833333	0.833333
cryptic	Fixed distance transect	20	2	2	0.3	0.275	-0.025	-0.0833333	0.0833333
cryptic	Fixed distance transect	20	2	2	0.3	0.325	0.025	0.0833333	0.0833333
cryptic	Fixed distance transect	20	2	2	0.3	0.225	-0.075	-0.25	0.25
cryptic	Fixed distance transect	20	2	2	0.3	0.3	0	0	0
cryptic	Fixed distance transect	20	2	2	0.3	0.3	0	0	0
cryptic	Fixed distance transect	20	2	2	0.3	0.35	0.05	0.166667	0.166667
cryptic	Fixed distance transect	20	2	2	0.3	0.225	-0.075	-0.25	0.25
cryptic	Fixed distance transect	20	2	2	0.3	0.425	0.125	0.416667	0.416667
cryptic	Fixed distance transect	20	2	2	0.3	0.325	0.025	0.0833333	0.0833333
cryptic	Fixed distance transect	20	2	2	0.3	0.375	0.075	0.25	0.25
cryptic	Fixed distance transect	20	2	4	0.3	0.125	-0.175	-0.583333	0.583333
cryptic	Fixed distance transect	20	2	4	0.3	0.2	-0.1	-0.333333	0.333333
cryptic	Fixed distance transect	20	2	4	0.3	0.325	0.025	0.0833333	0.0833333
cryptic	Fixed distance transect	20	2	4	0.3	0.15	-0.15	-0.5	0.5
cryptic	Fixed distance transect	20	2	4	0.3	0.35	0.05	0.166667	0.166667
cryptic	Fixed distance transect	20	2	4	0.3	0.225	-0.075	-0.25	0.25
cryptic	Fixed distance transect	20	2	4	0.3	0.225	-0.075	-0.25	0.25
cryptic	Fixed distance transect	20	2	4	0.3	0.35	0.05	0.166667	0.166667
cryptic	Fixed distance transect	20	2	4	0.3	0.2	-0.1	-0.333333	0.333333
cryptic	Fixed distance transect	20	2	4	0.3	0.275	-0.025	-0.0833333	0.0833333
cryptic	Fixed distance transect	20	2	6	0.3	0.225	-0.075	-0.25	0.25
cryptic	Fixed distance transect	20	2	6	0.3	0.2	-0.1	-0.333333	0.333333
cryptic	Fixed distance transect	20	2	6	0.3	0.15	-0.15	-0.5	0.5
cryptic	Fixed distance transect	20	2	6	0.3	0.3	0	0	0
cryptic	Fixed distance transect	20	2	6	0.3	0.225	-0.075	-0.25	0.25
cryptic	Fixed distance transect	20	2	6	0.3	0.225	-0.075	-0.25	0.25
cryptic	Fixed distance transect	20	2	6	0.3	0.075	-0.225	-0.75	0.75
cryptic	Fixed distance transect	20	2	6	0.3	0.1	-0.2	-0.666667	0.666667
cryptic	Fixed distance transect	20	2	6	0.3	0.2	-0.1	-0.333333	0.333333
cryptic	Fixed distance transect	20	2	6	0.3	0.125	-0.175	-0.583333	0.583333
cryptic	Fixed distance transect	20	2	8	0.3	0.2	-0.1	-0.333333	0.333333
cryptic	Fixed distance transect	20	2	8	0.3	0.175	-0.125	-0.416667	0.416667
cryptic	Fixed distance transect	20	2	8	0.3	0.175	-0.125	-0.416667	0.416667
cryptic	Fixed distance transect	20	2	8	0.3	0.175	-0.125	-0.416667	0.416667
cryptic	Fixed distance transect	20	2	8	0.3	0.2	-0.1	-0.333333	0.333333
cryptic	Fixed distance transect	20	2	8	0.3	0.25	-0.05	-0.166667	0.166667
cryptic	Fixed distance transect	20	2	8	0.3	0.2	-0.1	-0.333333	0.333333
cryptic	Fixed distance transect	20	2	8	0.3	0.15	-0.15	-0.5	0.5
cryptic	Fixed distance transect	20	2	8	0.3	0.3	0	0	0
cryptic	Fixed distance transect	20	2	8	0.3	0.15	-0.15	-0.5	0.5
cryptic	Fixed distance transect	20	2	10	0.3	0.225	-0.075	-0.25	0.25
cryptic	Fixed distance transect	20	2	10	0.3	0.1	-0.2	-0.666667	0.666667
cryptic	Fixed distance transect	20	2	10	0.3	0.25	-0.05	-0.166667	0.166667
cryptic	Fixed distance transect	20	2	10	0.3	0.15	-0.15	-0.5	0.5
cryptic	Fixed distance transect	20	2	10	0.3	0.15	-0.15	-0.5	0.5
cryptic	Fixed distance transect	20	2	10	0.3	0.25	-0.05	-0.166667	0.166667
cryptic	Fixed distance transect	20	2	10	0.3	0.275	-0.025	-0.0833333	0.0833333
cryptic	Fixed distance transect	20	2	10	0.3	0.125	-0.175	-0.583333	0.583333
cryptic	Fixed distance transect	20	2	10	0.3	0.25	-0.05	-0.166667	0.166667
cryptic	Fixed distance transect	20	2	10	0.3	0.15	-0.15	-0.5	0.5
cryptic	Fixed distance transect	20	3	2	0.3	0.283	-0.017	-0.0566667	0.0566667
cryptic	Fixed distance transect	20	3	2	0.3	0.183	-0.117	-0.39	0.39
cryptic	Fixed distance transect	20	3	2	0.3	0.183	-0.117	-0.39	0.39
cryptic	Fixed distance transect	20	3	2	0.3	0.2	-0.1	-0.333333	0.333333
cryptic	Fixed distance transect	20	3	2	0.3	0.25	-0.05	-0.166667	0.166667
cryptic	Fixed distance transect	20	3	2	0.3	0.133	-0.167	-0.556667	0.556667
cryptic	Fixed distance transect	20	3	2	0.3	0.25	-0.05	-0.166667	0.166667
cryptic	Fixed distance transect	20	3	2	0.3	0.283	-0.017	-0.0566667	0.0566667
cryptic	Fixed distance transect	20	3	2	0.3	0.25	-0.05	-0.166667	0.166667
cryptic	Fixed distance transect	20	3	2	0.3	0.133	-0.167	-0.556667	0.556667
cryptic	Fixed distance transect	20	3	4	0.3	0.133	-0.167	-0.556667	0.556667
cryptic	Fixed distance transect	20	3	4	0.3	0.2	-0.1	-0.333333	0.333333
cryptic	Fixed distance transect	20	3	4	0.3	0.183	-0.117	-0.39	0.39
cryptic	Fixed distance transect	20	3	4	0.3	0.25	-0.05	-0.166667	0.166667
cryptic	Fixed distance transect	20	3	4	0.3	0.167	-0.133	-0.443333	0.443333
cryptic	Fixed distance transect	20	3	4	0.3	0.083	-0.217	-0.723333	0.723333
cryptic	Fixed distance transect	20	3	4	0.3	0.167	-0.133	-0.443333	0.443333
cryptic	Fixed distance transect	20	3	4	0.3	0.217	-0.083	-0.276667	0.276667
cryptic	Fixed distance transect	20	3	4	0.3	0.117	-0.183	-0.61	0.61
cryptic	Fixed distance transect	20	3	4	0.3	0.15	-0.15	-0.5	0.5
cryptic	Fixed distance transect	20	3	6	0.3	0.167	-0.133	-0.443333	0.443333
cryptic	Fixed distance transect	20	3	6	0.3	0.15	-0.15	-0.5	0.5
cryptic	Fixed distance transect	20	3	6	0.3	0.067	-0.233	-0.776667	0.776667
cryptic	Fixed distance transect	20	3	6	0.3	0.15	-0.15	-0.5	0.5
cryptic	Fixed distance transect	20	3	6	0.3	0.1	-0.2	-0.666667	0.666667
cryptic	Fixed distance transect	20	3	6	0.3	0.183	-0.117	-0.39	0.39
cryptic	Fixed distance transect	20	3	6	0.3	0.1	-0.2	-0.666667	0.666667
cryptic	Fixed distance transect	20	3	6	0.3	0.117	-0.183	-0.61	0.61
cryptic	Fixed distance transect	20	3	6	0.3	0.033	-0.267	-0.89	0.89
cryptic	Fixed distance transect	20	3	6	0.3	0.167	-0.133	-0.443333	0.443333
cryptic	Fixed distance transect	20	3	8	0.3	0.133	-0.167	-0.556667	0.556667
cryptic	Fixed distance transect	20	3	8	0.3	0.1	-0.2	-0.666667	0.666667
cryptic	Fixed distance transect	20	3	8	0.3	0.183	-0.117	-0.39	0.39
cryptic	Fixed distance transect	20	3	8	0.3	0.217	-0.083	-0.276667	0.276667
cryptic	Fixed distance transect	20	3	8	0.3	0.133	-0.167	-0.556667	0.556667
cryptic	Fixed distance transect	20	3	8	0.3	0.083	-0.217	-0.723333	0.723333
cryptic	Fixed distance transect	20	3	8	0.3	0.1	-0.2	-0.666667	0.666667
cryptic	Fixed distance transect	20	3	8	0.3	0.067	-0.233	-0.776667	0.776667
cryptic	Fixed distance transect	20	3	8	0.3	0.167	-0.133	-0.443333	0.443333
cryptic	Fixed distance transect	20	3	8	0.3	0.083	-0.217	-0.723333	0.723333
cryptic	Fixed distance transect	20	3	10	0.3	0.133	-0.167	-0.556667	0.556667
cryptic	Fixed distance transect	20	3	10	0.3	0.033	-0.267	-0.89	0.89
cryptic	Fixed distance transect	20	3	10	0.3	0.083	-0.217	-0.723333	0.723333
cryptic	Fixed distance transect	20	3	10	0.3	0.117	-0.183	-0.61	0.61
cryptic	Fixed distance transect	20	3	10	0.3	0.117	-0.183	-0.61	0.61
cryptic	Fixed distance transect	20	3	10	0.3	0.117	-0.183	-0.61	0.61
cryptic	Fixed distance transect	20	3	10	0.3	0.117	-0.183	-0.61	0.61
cryptic	Fixed distance transect	20	3	10	0.3	0.033	-0.267	-0.89	0.89
cryptic	Fixed distance transect	20	3	10	0.3	0.217	-0.083	-0.276667	0.276667
cryptic	Fixed distance transect	20	3	10	0.3	0.167	-0.133	-0.443333	0.443333
cryptic	Fixed distance transect	20	4	2	0.3	0.213	-0.087	-0.29	0.29
cryptic	Fixed distance transect	20	4	2	0.3	0.163	-0.137	-0.456667	0.456667
cryptic	Fixed distance transect	20	4	2	0.3	0.225	-0.075	-0.25	0.25
cryptic	Fixed distance transect	20	4	2	0.3	0.175	-0.125	-0.416667	0.416667
cryptic	Fixed distance transect	20	4	2	0.3	0.138	-0.162	-0.54	0.54
cryptic	Fixed distance transect	20	4	2	0.3	0.163	-0.137	-0.456667	0.456667
cryptic	Fixed distance transect	20	4	2	0.3	0.05	-0.25	-0.833333	0.833333
cryptic	Fixed distance transect	20	4	2	0.3	0.188	-0.112	-0.373333	0.373333
cryptic	Fixed distance transect	20	4	2	0.3	0.238	-0.062	-0.206667	0.206667
cryptic	Fixed distance transect	20	4	2	0.3	0.2	-0.1	-0.333333	0.333333
cryptic	Fixed distance transect	20	4	4	0.3	0.113	-0.187	-0.623333	0.623333
cryptic	Fixed distance transect	20	4	4	0.3	0.125	-0.175	-0.583333	0.583333
cryptic	Fixed distance transect	20	4	4	0.3	0.088	-0.212	-0.706667	0.706667
cryptic	Fixed distance transect	20	4	4	0.3	0.213	-0.087	-0.29	0.29
cryptic	Fixed distance transect	20	4	4	0.3	0.088	-0.212	-0.706667	0.706667
cryptic	Fixed distance transect	20	4	4	0.3	0.15	-0.15	-0.5	0.5
cryptic	Fixed distance transect	20	4	4	0.3	0.15	-0.15	-0.5	0.5
cryptic	Fixed distance transect	20	4	4	0.3	0.163	-0.137	-0.456667	0.456667
cryptic	Fixed distance transect	20	4	4	0.3	0.125	-0.175	-0.583333	0.583333
cryptic	Fixed distance transect	20	4	4	0.3	0.163	-0.137	-0.456667	0.456667
cryptic	Fixed distance transect	20	4	6	0.3	0.113	-0.187	-0.623333	0.623333
cryptic	Fixed distance transect	20	4	6	0.3	0.05	-0.25	-0.833333	0.833333
cryptic	Fixed distance transect	20	4	6	0.3	0.063	-0.237	-0.79	0.79
cryptic	Fixed distance transect	20	4	6	0.3	0.1	-0.2	-0.666667	0.666667
cryptic	Fixed distance transect	20	4	6	0.3	0.075	-0.225	-0.75	0.75
cryptic	Fixed distance transect	20	4	6	0.3	0.063	-0.237	-0.79	0.79
cryptic	Fixed distance transect	20	4	6	0.3	0.138	-0.162	-0.54	0.54
cryptic	Fixed distance transect	20	4	6	0.3	0.125	-0.175	-0.583333	0.583333
cryptic	Fixed distance transect	20	4	6	0.3	0.075	-0.225	-0.75	0.75
cryptic	Fixed distance transect	20	4	6	0.3	0.163	-0.137	-0.456667	0.456667
cryptic	Fixed distance transect	20	4	8	0.3	0.025	-0.275	-0.916667	0.916667
cryptic	Fixed distance transect	20	4	8	0.3	0.125	-0.175	-0.583333	0.583333
cryptic	Fixed distance transect	20	4	8	0.3	0.125	-0.175	-0.583333	0.583333
cryptic	Fixed distance transect	20	4	8	0.3	0.088	-0.212	-0.706667	0.706667
cryptic	Fixed distance transect	20	4	8	0.3	0.063	-0.237	-0.79	0.79
cryptic	Fixed distance transect	20	4	8	0.3	0.138	-0.162	-0.54	0.54
cryptic	Fixed distance transect	20	4	8	0.3	0.063	-0.237	-0.79	0.79
cryptic	Fixed distance transect	20	4	8	0.3	0.1	-0.2	-0.666667	0.666667
cryptic	Fixed distance transect	20	4	8	0.3	0.088	-0.212	-0.706667	0.706667
cryptic	Fixed distance transect	20	4	8	0.3	0.088	-0.212	-0.706667	0.706667
cryptic	Fixed distance transect	20	4	10	0.3	0.038	-0.262	-0.873333	0.873333
cryptic	Fixed distance transect	20	4	10	0.3	0.05	-0.25	-0.833333	0.833333
cryptic	Fixed distance transect	20	4	10	0.3	0.15	-0.15	-0.5	0.5
cryptic	Fixed distance transect	20	4	10	0.3	0.038	-0.262	-0.873333	0.873333
cryptic	Fixed distance transect	20	4	10	0.3	0.088	-0.212	-0.706667	0.706667
cryptic	Fixed distance transect	20	4	10	0.3	0.05	-0.25	-0.833333	0.833333
cryptic	Fixed distance transect	20	4	10	0.3	0.063	-0.237	-0.79	0.79
cryptic	Fixed distance transect	20	4	10	0.3	0.075	-0.225	-0.75	0.75
cryptic	Fixed distance transect	20	4	10	0.3	0.05	-0.25	-0.833333	0.833333
cryptic	Fixed distance transect	20	4	10	0.3	0.075	-0.225	-0.75	0.75
cryptic	Fixed distance transect	20	5	2	0.3	0.21	-0.09	-0.3	0.3
cryptic	Fixed distance transect	20	5	2	0.3	0.12	-0.18	-0.6	0.6
cryptic	Fixed distance transect	20	5	2	0.3	0.1	-0.2	-0.666667	0.666667
cryptic	Fixed distance transect	20	5	2	0.3	0.12	-0.18	-0.6	0.6
cryptic	Fixed distance transect	20	5	2	0.3	0.09	-0.21	-0.7	0.7
cryptic	Fixed distance transect	20	5	2	0.3	0.11	-0.19	-0.633333	0.633333
cryptic	Fixed distance transect	20	5	2	0.3	0.17	-0.13	-0.433333	0.433333
cryptic	Fixed distance transect	20	5	2	0.3	0.16	-0.14	-0.466667	0.466667
cryptic	Fixed distance transect	20	5	2	0.3	0.13	-0.17	-0.566667	0.566667
cryptic	Fixed distance transect	20	5	2	0.3	0.12	-0.18	-0.6	0.6
cryptic	Fixed distance transect	20	5	4	0.3	0.13	-0.17	-0.566667	0.566667
cryptic	Fixed distance transect	20	5	4	0.3	0.08	-0.22	-0.733333	0.733333
cryptic	Fixed distance transect	20	5	4	0.3	0.07	-0.23	-0.766667	0.766667
cryptic	Fixed distance transect	20	5	4	0.3	0.11	-0.19	-0.633333	0.633333
cryptic	Fixed distance transect	20	5	4	0.3	0.12	-0.18	-0.6	0.6
cryptic	Fixed distance transect	20	5	4	0.3	0.07	-0.23	-0.766667	0.766667
cryptic	Fixed distance transect	20	5	4	0.3	0.08	-0.22	-0.733333	0.733333
cryptic	Fixed distance transect	20	5	4	0.3	0.06	-0.24	-0.8	0.8
cryptic	Fixed distance transect	20	5	4	0.3	0.14	-0.16	-0.533333	0.533333
cryptic	Fixed distance transect	20	5	4	0.3	0.12	-0.18	-0.6	0.6
cryptic	Fixed distance transect	20	5	6	0.3	0.17	-0.13	-0.433333	0.433333
cryptic	Fixed distance transect	20	5	6	0.3	0.09	-0.21	-0.7	0.7
cryptic	Fixed distance transect	20	5	6	0.3	0.08	-0.22	-0.733333	0.733333
cryptic	Fixed distance transect	20	5	6	0.3	0.1	-0.2	-0.666667	0.666667
cryptic	Fixed distance transect	20	5	6	0.3	0.07	-0.23	-0.766667	0.766667
cryptic	Fixed distance transect	20	5	6	0.3	0.1	-0.2	-0.666667	0.666667
cryptic	Fixed distance transect	20	5	6	0.3	0.06	-0.24	-0.8	0.8
cryptic	Fixed distance transect	20	5	6	0.3	0.06	-0.24	-0.8	0.8
cryptic	Fixed distance transect	20	5	6	0.3	0.08	-0.22	-0.733333	0.733333
cryptic	Fixed distance transect	20	5	6	0.3	0.07	-0.23	-0.766667	0.766667
cryptic	Fixed distance transect	20	5	8	0.3	0.08	-0.22	-0.733333	0.733333
cryptic	Fixed distance transect	20	5	8	0.3	0.07	-0.23	-0.766667	0.766667
cryptic	Fixed distance transect	20	5	8	0.3	0.07	-0.23	-0.766667	0.766667
cryptic	Fixed distance transect	20	5	8	0.3	0.06	-0.24	-0.8	0.8
cryptic	Fixed distance transect	20	5	8	0.3	0.09	-0.21	-0.7	0.7
cryptic	Fixed distance transect	20	5	8	0.3	0.03	-0.27	-0.9	0.9
cryptic	Fixed distance transect	20	5	8	0.3	0.06	-0.24	-0.8	0.8
cryptic	Fixed distance transect	20	5	8	0.3	0.03	-0.27	-0.9	0.9
cryptic	Fixed distance transect	20	5	8	0.3	0.05	-0.25	-0.833333	0.833333
cryptic	Fixed distance transect	20	5	8	0.3	0.07	-0.23	-0.766667	0.766667
cryptic	Fixed distance transect	20	5	10	0.3	0.04	-0.26	-0.866667	0.866667
cryptic	Fixed distance transect	20	5	10	0.3	0.08	-0.22	-0.733333	0.733333
cryptic	Fixed distance transect	20	5	10	0.3	0.03	-0.27	-0.9	0.9
cryptic	Fixed distance transect	20	5	10	0.3	0.06	-0.24	-0.8	0.8
cryptic	Fixed distance transect	20	5	10	0.3	0.09	-0.21	-0.7	0.7
cryptic	Fixed distance transect	20	5	10	0.3	0.07	-0.23	-0.766667	0.766667
cryptic	Fixed distance transect	20	5	10	0.3	0.05	-0.25	-0.833333	0.833333
cryptic	Fixed distance transect	20	5	10	0.3	0.11	-0.19	-0.633333	0.633333
cryptic	Fixed distance transect	20	5	10	0.3	0.11	-0.19	-0.633333	0.633333
cryptic	Fixed distance transect	20	5	10	0.3	0.12	-0.18	-0.6	0.6
cryptic	Fixed distance transect	30	1	2	0.3	0.333	0.033	0.11	0.11
cryptic	Fixed distance transect	30	1	2	0.3	0.233	-0.067	-0.223333	0.223333
cryptic	Fixed distance transect	30	1	2	0.3	0.367	0.067	0.223333	0.223333
cryptic	Fixed distance transect	30	1	2	0.3	0.4	0.1	0.333333	0.333333
cryptic	Fixed distance transect	30	1	2	0.3	0.567	0.267	0.89	0.89
cryptic	Fixed distance transect	30	1	2	0.3	0.2	-0.1	-0.333333	0.333333
cryptic	Fixed distance transect	30	1	2	0.3	0.367	0.067	0.223333	0.223333
cryptic	Fixed distance transect	30	1	2	0.3	0.2	-0.1	-0.333333	0.333333
cryptic	Fixed distance transect	30	1	2	0.3	0.333	0.033	0.11	0.11
cryptic	Fixed distance transect	30	1	2	0.3	0.4	0.1	0.333333	0.333333
cryptic	Fixed distance transect	30	1	4	0.3	0.367	0.067	0.223333	0.223333
cryptic	Fixed distance transect	30	1	4	0.3	0.133	-0.167	-0.556667	0.556667
cryptic	Fixed distance transect	30	1	4	0.3	0.367	0.067	0.223333	0.223333
cryptic	Fixed distance transect	30	1	4	0.3	0.233	-0.067	-0.223333	0.223333
cryptic	Fixed distance transect	30	1	4	0.3	0.4	0.1	0.333333	0.333333
cryptic	Fixed distance transect	30	1	4	0.3	0.133	-0.167	-0.556667	0.556667
cryptic	Fixed distance transect	30	1	4	0.3	0.4	0.1	0.333333	0.333333
cryptic	Fixed distance transect	30	1	4	0.3	0.3	0	0	0
cryptic	Fixed distance transect	30	1	4	0.3	0.167	-0.133	-0.443333	0.443333
cryptic	Fixed distance transect	30	1	4	0.3	0.333	0.033	0.11	0.11
cryptic	Fixed distance transect	30	1	6	0.3	0.233	-0.067	-0.223333	0.223333
cryptic	Fixed distance transect	30	1	6	0.3	0.267	-0.033	-0.11	0.11
cryptic	Fixed distance transect	30	1	6	0.3	0.233	-0.067	-0.223333	0.223333
cryptic	Fixed distance transect	30	1	6	0.3	0.367	0.067	0.223333	0.223333
cryptic	Fixed distance transect	30	1	6	0.3	0.2	-0.1	-0.333333	0.333333
cryptic	Fixed distance transect	30	1	6	0.3	0.333	0.033	0.11	0.11
cryptic	Fixed distance transect	30	1	6	0.3	0.133	-0.167	-0.556667	0.556667
cryptic	Fixed distance transect	30	1	6	0.3	0.233	-0.067	-0.223333	0.223333
cryptic	Fixed distance transect	30	1	6	0.3	0.367	0.067	0.223333	0.223333
cryptic	Fixed distance transect	30	1	6	0.3	0.067	-0.233	-0.776667	0.776667
cryptic	Fixed distance transect	30	1	8	0.3	0.333	0.033	0.11	0.11
cryptic	Fixed distance transect	30	1	8	0.3	0.1	-0.2	-0.666667	0.666667
cryptic	Fixed distance transect	30	1	8	0.3	0.2	-0.1	-0.333333	0.333333
cryptic	Fixed distance transect	30	1	8	0.3	0.267	-0.033	-0.11	0.11
cryptic	Fixed distance transect	30	1	8	0.3	0.2	-0.1	-0.333333	0.333333
cryptic	Fixed distance transect	30	1	8	0.3	0.267	-0.033	-0.11	0.11
cryptic	Fixed distance transect	30	1	8	0.3	0.133	-0.167	-0.556667	0.556667
cryptic	Fixed distance transect	30	1	8	0.3	0.3	0	0	0
cryptic	Fixed distance transect	30	1	8	0.3	0.2	-0.1	-0.333333	0.333333
cryptic	Fixed distance transect	30	1	8	0.3	0.133	-0.167	-0.556667	0.556667
cryptic	Fixed distance transect	30	1	10	0.3	0.2	-0.1	-0.333333	0.333333
cryptic	Fixed distance transect	30	1	10	0.3	0.1	-0.2	-0.666667	0.666667
cryptic	Fixed distance transect	30	1	10	0.3	0.267	-0.033	-0.11	0.11
cryptic	Fixed distance transect	30	1	10	0.3	0.2	-0.1	-0.333333	0.333333
cryptic	Fixed distance transect	30	1	10	0.3	0.1	-0.2	-0.666667	0.666667
cryptic	Fixed distance transect	30	1	10	0.3	0.133	-0.167	-0.556667	0.556667
cryptic	Fixed distance transect	30	1	10	0.3	0.167	-0.133	-0.443333	0.443333
cryptic	Fixed distance transect	30	1	10	0.3	0.2	-0.1	-0.333333	0.333333
cryptic	Fixed distance transect	30	1	10	0.3	0.1	-0.2	-0.666667	0.666667
cryptic	Fixed distance transect	30	1	10	0.3	0.267	-0.033	-0.11	0.11
cryptic	Fixed distance transect	30	2	2	0.3	0.317	0.017	0.0566667	0.0566667
cryptic	Fixed distance transect	30	2	2	0.3	0.283	-0.017	-0.0566667	0.0566667
cryptic	Fixed distance transect	30	2	2	0.3	0.383	0.083	0.276667	0.276667
cryptic	Fixed distance transect	30	2	2	0.3	0.283	-0.017	-0.0566667	0.0566667
cryptic	Fixed distance transect	30	2	2	0.3	0.383	0.083	0.276667	0.276667
cryptic	Fixed distance transect	30	2	2	0.3	0.433	0.133	0.443333	0.443333
cryptic	Fixed distance transect	30	2	2	0.3	0.3	0	0	0
cryptic	Fixed distance transect	30	2	2	0.3	0.25	-0.05	-0.166667	0.166667
cryptic	Fixed distance transect	30	2	2	0.3	0.35	0.05	0.166667	0.166667
cryptic	Fixed distance transect	30	2	2	0.3	0.167	-0.133	-0.443333	0.443333
cryptic	Fixed distance transect	30	2	4	0.3	0.367	0.067	0.223333	0.223333
cryptic	Fixed distance transect	30	2	4	0.3	0.25	-0.05	-0.166667	0.166667
cryptic	Fixed distance transect	30	2	4	0.3	0.167	-0.133	-0.443333	0.443333
cryptic	Fixed distance transect	30	2	4	0.3	0.183	-0.117	-0.39	0.39
cryptic	Fixed distance transect	30	2	4	0.3	0.233	-0.067	-0.223333	0.223333
cryptic	Fixed distance transect	30	2	4	0.3	0.167	-0.133	-0.443333	0.443333
cryptic	Fixed distance transect	30	2	4	0.3	0.167	-0.133	-0.443333	0.443333
cryptic	Fixed distance transect	30	2	4	0.3	0.167	-0.133	-0.443333	0.443333
cryptic	Fixed distance transect	30	2	4	0.3	0.167	-0.133	-0.443333	0.443333
cryptic	Fixed distance transect	30	2	4	0.3	0.2	-0.1	-0.333333	0.333333
cryptic	Fixed distance transect	30	2	6	0.3	0.15	-0.15	-0.5	0.5
cryptic	Fixed distance transect	30	2	6	0.3	0.217	-0.083	-0.276667	0.276667
cryptic	Fixed distance transect	30	2	6	0.3	0.25	-0.05	-0.166667	0.166667
cryptic	Fixed distance transect	30	2	6	0.3	0.283	-0.017	-0.0566667	0.0566667
cryptic	Fixed distance transect	30	2	6	0.3	0.217	-0.083	-0.276667	0.276667
cryptic	Fixed distance transect	30	2	6	0.3	0.35	0.05	0.166667	0.166667
cryptic	Fixed distance transect	30	2	6	0.3	0.167	-0.133	-0.443333	0.443333
cryptic	Fixed distance transect	30	2	6	0.3	0.267	-0.033	-0.11	0.11
cryptic	Fixed distance transect	30	2	6	0.3	0.283	-0.017	-0.0566667	0.0566667
cryptic	Fixed distance transect	30	2	6	0.3	0.35	0.05	0.166667	0.166667
cryptic	Fixed distance transect	30	2	8	0.3	0.2	-0.1	-0.333333	0.333333
cryptic	Fixed distance transect	30	2	8	0.3	0.167	-0.133	-0.443333	0.443333
cryptic	Fixed distance transect	30	2	8	0.3	0.267	-0.033	-0.11	0.11
cryptic	Fixed distance transect	30	2	8	0.3	0.2	-0.1	-0.333333	0.333333
cryptic	Fixed distance transect	30	2	8	0.3	0.183	-0.117	-0.39	0.39
cryptic	Fixed distance transect	30	2	8	0.3	0.167	-0.133	-0.443333	0.443333
cryptic	Fixed distance transect	30	2	8	0.3	0.117	-0.183	-0.61	0.61
cryptic	Fixed distance transect	30	2	8	0.3	0.167	-0.133	-0.443333	0.443333
cryptic	Fixed distance transect	30	2	8	0.3	0.117	-0.183	-0.61	0.61
cryptic	Fixed distance transect	30	2	8	0.3	0.183	-0.117	-0.39	0.39
cryptic	Fixed distance transect	30	2	10	0.3	0.067	-0.233	-0.776667	0.776667
cryptic	Fixed distance transect	30	2	10	0.3	0.25	-0.05	-0.166667	0.166667
cryptic	Fixed distance transect	30	2	10	0.3	0.283	-0.017	-0.0566667	0.0566667
cryptic	Fixed distance transect	30	2	10	0.3	0.117	-0.183	-0.61	0.61
cryptic	Fixed distance transect	30	2	10	0.3	0.217	-0.083	-0.276667	0.276667
cryptic	Fixed distance transect	30	2	10	0.3	0.217	-0.083	-0.276667	0.276667
cryptic	Fixed distance transect	30	2	10	0.3	0.167	-0.133	-0.443333	0.443333
cryptic	Fixed distance transect	30	2	10	0.3	0.117	-0.183	-0.61	0.61
cryptic	Fixed distance transect	30	2	10	0.3	0.2	-0.1	-0.333333	0.333333
cryptic	Fixed distance transect	30	2	10	0.3	0.15	-0.15	-0.5	0.5
cryptic	Fixed distance transect	30	3	2	0.3	0.256	-0.044	-0.146667	0.146667
cryptic	Fixed distance transect	30	3	2	0.3	0.333	0.033	0.11	0.11
cryptic	Fixed distance transect	30	3	2	0.3	0.156	-0.144	-0.48	0.48
cryptic	Fixed distance transect	30	3	2	0.3	0.156	-0.144	-0.48	0.48
cryptic	Fixed distance transect	30	3	2	0.3	0.2	-0.1	-0.333333	0.333333
cryptic	Fixed distance transect	30	3	2	0.3	0.233	-0.067	-0.223333	0.223333
cryptic	Fixed distance transect	30	3	2	0.3	0.211	-0.089	-0.296667	0.296667
cryptic	Fixed distance transect	30	3	2	0.3	0.233	-0.067	-0.223333	0.223333
cryptic	Fixed distance transect	30	3	2	0.3	0.167	-0.133	-0.443333	0.443333
cryptic	Fixed distance transect	30	3	2	0.3	0.189	-0.111	-0.37	0.37
cryptic	Fixed distance transect	30	3	4	0.3	0.133	-0.167	-0.556667	0.556667
cryptic	Fixed distance transect	30	3	4	0.3	0.189	-0.111	-0.37	0.37
cryptic	Fixed distance transect	30	3	4	0.3	0.156	-0.144	-0.48	0.48
cryptic	Fixed distance transect	30	3	4	0.3	0.122	-0.178	-0.593333	0.593333
cryptic	Fixed distance transect	30	3	4	0.3	0.222	-0.078	-0.26	0.26
cryptic	Fixed distance transect	30	3	4	0.3	0.222	-0.078	-0.26	0.26
cryptic	Fixed distance transect	30	3	4	0.3	0.144	-0.156	-0.52	0.52
cryptic	Fixed distance transect	30	3	4	0.3	0.256	-0.044	-0.146667	0.146667
cryptic	Fixed distance transect	30	3	4	0.3	0.256	-0.044	-0.146667	0.146667
cryptic	Fixed distance transect	30	3	4	0.3	0.111	-0.189	-0.63	0.63
cryptic	Fixed distance transect	30	3	6	0.3	0.167	-0.133	-0.443333	0.443333
cryptic	Fixed distance transect	30	3	6	0.3	0.133	-0.167	-0.556667	0.556667
cryptic	Fixed distance transect	30	3	6	0.3	0.144	-0.156	-0.52	0.52
cryptic	Fixed distance transect	30	3	6	0.3	0.167	-0.133	-0.443333	0.443333
cryptic	Fixed distance transect	30	3	6	0.3	0.167	-0.133	-0.443333	0.443333
cryptic	Fixed distance transect	30	3	6	0.3	0.111	-0.189	-0.63	0.63
cryptic	Fixed distance transect	30	3	6	0.3	0.122	-0.178	-0.593333	0.593333
cryptic	Fixed distance transect	30	3	6	0.3	0.111	-0.189	-0.63	0.63
cryptic	Fixed distance transect	30	3	6	0.3	0.1	-0.2	-0.666667	0.666667
cryptic	Fixed distance transect	30	3	6	0.3	0.189	-0.111	-0.37	0.37
cryptic	Fixed distance transect	30	3	8	0.3	0.189	-0.111	-0.37	0.37
cryptic	Fixed distance transect	30	3	8	0.3	0.078	-0.222	-0.74	0.74
cryptic	Fixed distance transect	30	3	8	0.3	0.089	-0.211	-0.703333	0.703333
cryptic	Fixed distance transect	30	3	8	0.3	0.189	-0.111	-0.37	0.37
cryptic	Fixed distance transect	30	3	8	0.3	0.167	-0.133	-0.443333	0.443333
cryptic	Fixed distance transect	30	3	8	0.3	0.111	-0.189	-0.63	0.63
cryptic	Fixed distance transect	30	3	8	0.3	0.144	-0.156	-0.52	0.52
cryptic	Fixed distance transect	30	3	8	0.3	0.189	-0.111	-0.37	0.37
cryptic	Fixed distance transect	30	3	8	0.3	0.122	-0.178	-0.593333	0.593333
cryptic	Fixed distance transect	30	3	8	0.3	0.178	-0.122	-0.406667	0.406667
cryptic	Fixed distance transect	30	3	10	0.3	0.078	-0.222	-0.74	0.74
cryptic	Fixed distance transect	30	3	10	0.3	0.1	-0.2	-0.666667	0.666667
cryptic	Fixed distance transect	30	3	10	0.3	0.056	-0.244	-0.813333	0.813333
cryptic	Fixed distance transect	30	3	10	0.3	0.167	-0.133	-0.443333	0.443333
cryptic	Fixed distance transect	30	3	10	0.3	0.111	-0.189	-0.63	0.63
cryptic	Fixed distance transect	30	3	10	0.3	0.178	-0.122	-0.406667	0.406667
cryptic	Fixed distance transect	30	3	10	0.3	0.1	-0.2	-0.666667	0.666667
cryptic	Fixed distance transect	30	3	10	0.3	0.122	-0.178	-0.593333	0.593333
cryptic	Fixed distance transect	30	3	10	0.3	0.144	-0.156	-0.52	0.52
cryptic	Fixed distance transect	30	3	10	0.3	0.167	-0.133	-0.443333	0.443333
cryptic	Fixed distance transect	30	4	2	0.3	0.15	-0.15	-0.5	0.5
cryptic	Fixed distance transect	30	4	2	0.3	0.158	-0.142	-0.473333	0.473333
cryptic	Fixed distance transect	30	4	2	0.3	0.2	-0.1	-0.333333	0.333333
cryptic	Fixed distance transect	30	4	2	0.3	0.15	-0.15	-0.5	0.5
cryptic	Fixed distance transect	30	4	2	0.3	0.175	-0.125	-0.416667	0.416667
cryptic	Fixed distance transect	30	4	2	0.3	0.15	-0.15	-0.5	0.5
cryptic	Fixed distance transect	30	4	2	0.3	0.208	-0.092	-0.306667	0.306667
cryptic	Fixed distance transect	30	4	2	0.3	0.158	-0.142	-0.473333	0.473333
cryptic	Fixed distance transect	30	4	2	0.3	0.192	-0.108	-0.36	0.36
cryptic	Fixed distance transect	30	4	2	0.3	0.117	-0.183	-0.61	0.61
cryptic	Fixed distance transect	30	4	4	0.3	0.075	-0.225	-0.75	0.75
cryptic	Fixed distance transect	30	4	4	0.3	0.175	-0.125	-0.416667	0.416667
cryptic	Fixed distance transect	30	4	4	0.3	0.1	-0.2	-0.666667	0.666667
cryptic	Fixed distance transect	30	4	4	0.3	0.167	-0.133	-0.443333	0.443333
cryptic	Fixed distance transect	30	4	4	0.3	0.117	-0.183	-0.61	0.61
cryptic	Fixed distance transect	30	4	4	0.3	0.15	-0.15	-0.5	0.5
cryptic	Fixed distance transect	30	4	4	0.3	0.067	-0.233	-0.776667	0.776667
cryptic	Fixed distance transect	30	4	4	0.3	0.092	-0.208	-0.693333	0.693333
cryptic	Fixed distance transect	30	4	4	0.3	0.133	-0.167	-0.556667	0.556667
cryptic	Fixed distance transect	30	4	4	0.3	0.158	-0.142	-0.473333	0.473333
cryptic	Fixed distance transect	30	4	6	0.3	0.117	-0.183	-0.61	0.61
cryptic	Fixed distance transect	30	4	6	0.3	0.125	-0.175	-0.583333	0.583333
cryptic	Fixed distance transect	30	4	6	0.3	0.175	-0.125	-0.416667	0.416667
cryptic	Fixed distance transect	30	4	6	0.3	0.125	-0.175	-0.583333	0.583333
cryptic	Fixed distance transect	30	4	6	0.3	0.092	-0.208	-0.693333	0.693333
cryptic	Fixed distance transect	30	4	6	0.3	0.125	-0.175	-0.583333	0.583333
cryptic	Fixed distance transect	30	4	6	0.3	0.133	-0.167	-0.556667	0.556667
cryptic	Fixed distance transect	30	4	6	0.3	0.133	-0.167	-0.556667	0.556667
cryptic	Fixed distance transect	30	4	6	0.3	0.167	-0.133	-0.443333	0.443333
cryptic	Fixed distance transect	30	4	6	0.3	0.133	-0.167	-0.556667	0.556667
cryptic	Fixed distance transect	30	4	8	0.3	0.117	-0.183	-0.61	0.61
cryptic	Fixed distance transect	30	4	8	0.3	0.117	-0.183	-0.61	0.61
cryptic	Fixed distance transect	30	4	8	0.3	0.083	-0.217	-0.723333	0.723333
cryptic	Fixed distance transect	30	4	8	0.3	0.1	-0.2	-0.666667	0.666667
cryptic	Fixed distance transect	30	4	8	0.3	0.083	-0.217	-0.723333	0.723333
cryptic	Fixed distance transect	30	4	8	0.3	0.05	-0.25	-0.833333	0.833333
cryptic	Fixed distance transect	30	4	8	0.3	0.083	-0.217	-0.723333	0.723333
cryptic	Fixed distance transect	30	4	8	0.3	0.058	-0.242	-0.806667	0.806667
cryptic	Fixed distance transect	30	4	8	0.3	0.108	-0.192	-0.64	0.64
cryptic	Fixed distance transect	30	4	8	0.3	0.067	-0.233	-0.776667	0.776667
cryptic	Fixed distance transect	30	4	10	0.3	0.058	-0.242	-0.806667	0.806667
cryptic	Fixed distance transect	30	4	10	0.3	0.1	-0.2	-0.666667	0.666667
cryptic	Fixed distance transect	30	4	10	0.3	0.1	-0.2	-0.666667	0.666667
cryptic	Fixed distance transect	30	4	10	0.3	0.067	-0.233	-0.776667	0.776667
cryptic	Fixed distance transect	30	4	10	0.3	0.092	-0.208	-0.693333	0.693333
cryptic	Fixed distance transect	30	4	10	0.3	0.083	-0.217	-0.723333	0.723333
cryptic	Fixed distance transect	30	4	10	0.3	0.092	-0.208	-0.693333	0.693333
cryptic	Fixed distance transect	30	4	10	0.3	0.083	-0.217	-0.723333	0.723333
cryptic	Fixed distance transect	30	4	10	0.3	0.067	-0.233	-0.776667	0.776667
cryptic	Fixed distance transect	30	4	10	0.3	0.058	-0.242	-0.806667	0.806667
cryptic	Fixed distance transect	30	5	2	0.3	0.173	-0.127	-0.423333	0.423333
cryptic	Fixed distance transect	30	5	2	0.3	0.067	-0.233	-0.776667	0.776667
cryptic	Fixed distance transect	30	5	2	0.3	0.1	-0.2	-0.666667	0.666667
cryptic	Fixed distance transect	30	5	2	0.3	0.14	-0.16	-0.533333	0.533333
cryptic	Fixed distance transect	30	5	2	0.3	0.107	-0.193	-0.643333	0.643333
cryptic	Fixed distance transect	30	5	2	0.3	0.113	-0.187	-0.623333	0.623333
cryptic	Fixed distance transect	30	5	2	0.3	0.113	-0.187	-0.623333	0.623333
cryptic	Fixed distance transect	30	5	2	0.3	0.127	-0.173	-0.576667	0.576667
cryptic	Fixed distance transect	30	5	2	0.3	0.133	-0.167	-0.556667	0.556667
cryptic	Fixed distance transect	30	5	2	0.3	0.167	-0.133	-0.443333	0.443333
cryptic	Fixed distance transect	30	5	4	0.3	0.087	-0.213	-0.71	0.71
cryptic	Fixed distance transect	30	5	4	0.3	0.08	-0.22	-0.733333	0.733333
cryptic	Fixed distance transect	30	5	4	0.3	0.053	-0.247	-0.823333	0.823333
cryptic	Fixed distance transect	30	5	4	0.3	0.1	-0.2	-0.666667	0.666667
cryptic	Fixed distance transect	30	5	4	0.3	0.127	-0.173	-0.576667	0.576667
cryptic	Fixed distance transect	30	5	4	0.3	0.06	-0.24	-0.8	0.8
cryptic	Fixed distance transect	30	5	4	0.3	0.06	-0.24	-0.8	0.8
cryptic	Fixed distance transect	30	5	4	0.3	0.08	-0.22	-0.733333	0.733333
cryptic	Fixed distance transect	30	5	4	0.3	0.08	-0.22	-0.733333	0.733333
cryptic	Fixed distance transect	30	5	4	0.3	0.113	-0.187	-0.623333	0.623333
cryptic	Fixed distance transect	30	5	6	0.3	0.107	-0.193	-0.643333	0.643333
cryptic	Fixed distance transect	30	5	6	0.3	0.1	-0.2	-0.666667	0.666667
cryptic	Fixed distance transect	30	5	6	0.3	0.147	-0.153	-0.51	0.51
cryptic	Fixed distance transect	30	5	6	0.3	0.067	-0.233	-0.776667	0.776667
cryptic	Fixed distance transect	30	5	6	0.3	0.08	-0.22	-0.733333	0.733333
cryptic	Fixed distance transect	30	5	6	0.3	0.1	-0.2	-0.666667	0.666667
cryptic	Fixed distance transect	30	5	6	0.3	0.12	-0.18	-0.6	0.6
cryptic	Fixed distance transect	30	5	6	0.3	0.08	-0.22	-0.733333	0.733333
cryptic	Fixed distance transect	30	5	6	0.3	0.06	-0.24	-0.8	0.8
cryptic	Fixed distance transect	30	5	6	0.3	0.087	-0.213	-0.71	0.71
cryptic	Fixed distance transect	30	5	8	0.3	0.12	-0.18	-0.6	0.6
cryptic	Fixed distance transect	30	5	8	0.3	0.12	-0.18	-0.6	0.6
cryptic	Fixed distance transect	30	5	8	0.3	0.047	-0.253	-0.843333	0.843333
cryptic	Fixed distance transect	30	5	8	0.3	0.073	-0.227	-0.756667	0.756667
cryptic	Fixed distance transect	30	5	8	0.3	0.06	-0.24	-0.8	0.8
cryptic	Fixed distance transect	30	5	8	0.3	0.073	-0.227	-0.756667	0.756667
cryptic	Fixed distance transect	30	5	8	0.3	0.12	-0.18	-0.6	0.6
cryptic	Fixed distance transect	30	5	8	0.3	0.08	-0.22	-0.733333	0.733333
cryptic	Fixed distance transect	30	5	8	0.3	0.06	-0.24	-0.8	0.8
cryptic	Fixed distance transect	30	5	8	0.3	0.08	-0.22	-0.733333	0.733333
cryptic	Fixed distance transect	30	5	10	0.3	0.093	-0.207	-0.69	0.69
cryptic	Fixed distance transect	30	5	10	0.3	0.047	-0.253	-0.843333	0.843333
cryptic	Fixed distance transect	30	5	10	0.3	0.067	-0.233	-0.776667	0.776667
cryptic	Fixed distance transect	30	5	10	0.3	0.093	-0.207	-0.69	0.69
cryptic	Fixed distance transect	30	5	10	0.3	0.067	-0.233	-0.776667	0.776667
cryptic	Fixed distance transect	30	5	10	0.3	0.067	-0.233	-0.776667	0.776667
cryptic	Fixed distance transect	30	5	10	0.3	0.067	-0.233	-0.776667	0.776667
cryptic	Fixed distance transect	30	5	10	0.3	0.087	-0.213	-0.71	0.71
cryptic	Fixed distance transect	30	5	10	0.3	0.067	-0.233	-0.776667	0.776667
[truncated: 3,001 more rows]
